# Supplementary material for: A Hetero-Multimeric Chitinase-Containing Plasmodium falciparum and Plasmodium gallinaceum Ookinete-Secreted Protein Complex Involved in Mosquito Midgut Invasion
Source: PubMed Central journal article supplement (PMC7821095; doi:10.3389/fcimb.2020.615343), 2021-01-08
Supplement: DataSheet_2.pdf [file DataSheet_2.pdf]

## HPLC fractionation of *Plasmodium gallinaceum* ookinete culture supernatant

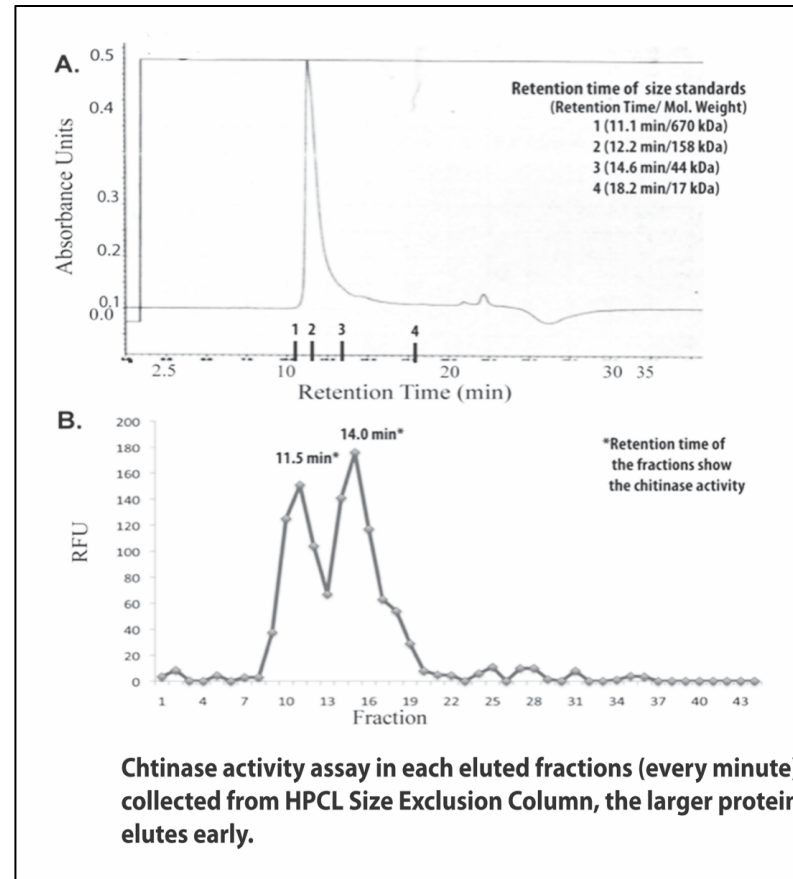

**Supplementary Figure 2: Size exclusion HPLC fractionation of *Plasmodium gallinaceum* ookinete culture supernatant and analysis of chitinase activity.** Approximately 50 mL of serum free ookinete culture supernatant was concentrated using Centricon (10 kDa cut off centrifugal filter devices, EMD Millipore, MT) to a final volume of 1 mL volume and loaded onto a TSKgel G2000SW column (Tosoh Biosciences LLC, King of Prussia, PA) using a Beckman Gold 500 HPLC instrument, Gel filtration standards (Bio-Rad) and autoclaved PBS (pH 7.4) were used for running the samples and fractions were collected. Approximately, 100  $\mu$ l of sample from each fraction (Total 0.5 mL volume/one minute) were analyzed in duplicates for the presence of chitinase activity. We observed two distinct chitinase peak activity in *P. gallinaceum* ookinete secreted culture supernatant. To analyze further the sample were analyzed on a high resolution chromatography followed by immuno-detection and estimation of the chitinase complex in both *P. falciparum* and *P. gallinaceum* (Figure 5).
