# Supplementary material for: A Hetero-Multimeric Chitinase-Containing Plasmodium falciparum and Plasmodium gallinaceum Ookinete-Secreted Protein Complex Involved in Mosquito Midgut Invasion
Source: PubMed Central journal article supplement (PMC7821095; doi:10.3389/fcimb.2020.615343), 2021-01-08
Supplement: DataSheet_3.pdf [file DataSheet_3.pdf]

## Silver staining of chitin bead affinity pulldown of *Plasmodium gallinaceum* chitinase complex

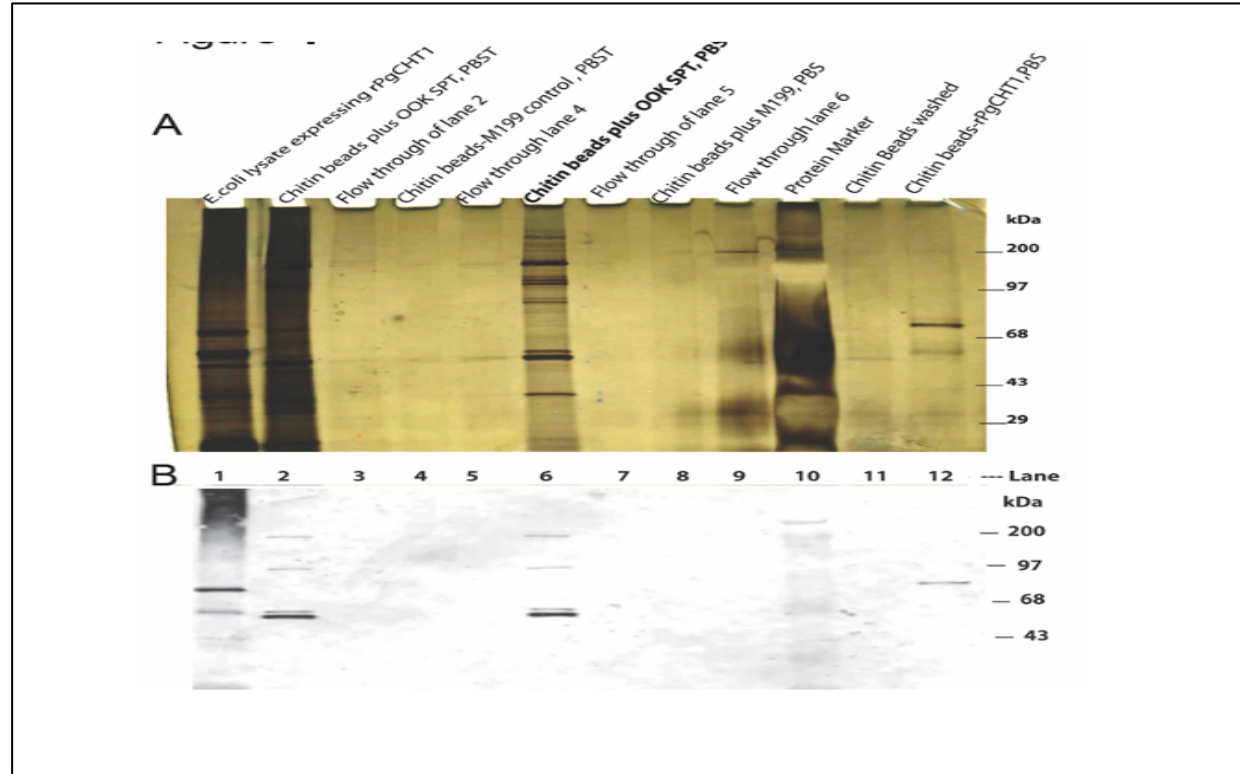

**Supplementary Figure 3 : Silver staining of chitin bead affinity pulldown of *Plasmodium gallinaceum* chitinase complex.** Chitin beads were added to serum-free *P. gallinaceum* ookinete culture supernatants as an affinity pulldown assay of the ookinete secretome to identify proteins associated with the chitinase complex. Protein bound beads were washed three times with PBS with 1% Tween 20 (PBST) or PBS (Lane 2 and 6 respectively). SDS sample buffer was directly added to beads, boiled, and analyzed by 4-12% Tris-Glycine gradient SDS-PAGE. As controls, samples were run along with chitin beads incubated in media alone (Lane 4 and 8), beads alone (lane 11), and incubated with rPgCMT1 protein (Lane 12) and flow through samples. One gel was silver stained and a replicate gel was used for Western immunoblotting, probed with mouse anti-chitinase active site peptide (B1993) polyclonal sera. Lanes 2 and 6 shows that the chitin beads pulled down the chitinases and interacting high molecular chitinase and protein complex band; washing with PBST did not detach the complex from the chitin beads. The duplex band (Lane 2 and 6, around 50 kDa, bottom panel) shows the with pro- and mature forms of PgCMT1 and two other higher immuno-reactive bands (100 kDa and just below 200 kDa) are homo or heteromeric forms of the chitinase-containing complex.
