# Supplementary material for: A Hetero-Multimeric Chitinase-Containing Plasmodium falciparum and Plasmodium gallinaceum Ookinete-Secreted Protein Complex Involved in Mosquito Midgut Invasion
Source: PubMed Central journal article supplement (PMC7821095; doi:10.3389/fcimb.2020.615343), 2021-01-08
Supplement: DataSheet_5.pdf [file DataSheet_5.pdf]

**Supplementary Table 1: List of primers (A) used for generating transgenic *P. berghei* chimeric parasite line expressing *PfCHT1* and product size (B)**

A

| Primer code                                                      | Sequence                                   | Enzymes      | Product (bp) | Description                    |
|------------------------------------------------------------------|--------------------------------------------|--------------|--------------|--------------------------------|
| <b>Primers used to generate construct pL2321</b>                 |                                            |              |              |                                |
| 9450                                                             | ACTGGGCCCGTAAGGGCGTAAAAATAACCAAAGG         | <i>Apal</i>  | 1049         | Forward <i>Pbcht1</i> HR1      |
| 9451                                                             | GAGCCGCGGTTTTCTAAATTTTGTAAAGTATATTA        | <i>SacII</i> |              | Reverse <i>Pbcht1</i> HR1      |
| 9452                                                             | CGAGGTACCGGATAAATACAAATTTTCTCACA           | <i>KpnI</i>  | 973          | Forward <i>Pbcht1</i> HR2      |
| 9453                                                             | CATGCGGCCGCTATTATTTAACGATGTTTTAGTTACAAAAAC | <i>NotI</i>  |              | Reverse <i>Pbcht1</i> HR2      |
| <b>Primers used to generate construct pL2322</b>                 |                                            |              |              |                                |
| 9454                                                             | GAGCCGCGGATGAATTTTACTGTGAAATATTCATTTTTAG   | <i>SacII</i> | 1137         | Forward <i>Pfcht1</i> ORF      |
| 9455                                                             | CGAGGTACCTTAATGTAAGATTCTACGAAATATTC        | <i>KpnI</i>  |              | Reverse <i>Pfcht1</i> ORF      |
| <b>Primers used for genotyping <i>PbΔcht1</i> (3152cl1)</b>      |                                            |              |              |                                |
| 9489                                                             | GTTGTAAAATTTAATAGTTCATACCATTACC            |              | 1316         | 5' integration                 |
| 7289                                                             | TAAAGCACAATATCTAGGATACTAC                  |              |              |                                |
| 7922                                                             | GTCTCTCAATGATTCATAAATAGTTGG                |              | 1320         | 3' integration                 |
| 9490                                                             | TATTATGAAAATGGTGAATTGACGCTTTAACC           |              |              |                                |
| 4698                                                             | GTTGCTAAACTGCATCGTC                        |              | 1108         | SM                             |
| 4699                                                             | GTTTGAGGTAGCAAGTAGACG                      |              |              |                                |
| 9532                                                             | ATCCCTATCACATGTTGACGCACTCTGC               |              | 1506         | <i>PbΔcht1</i> confirmation    |
| 9533                                                             | CTTGTTACCCATATAGCATCATTGTGTTTAGC           |              |              |                                |
| <b>Primers used for genotyping <i>Pb-PfCHT1(r)</i> (3165cl1)</b> |                                            |              |              |                                |
| 9454                                                             | GAGCCGCGGATGAATTTTACTGTGAAATATTCATTTTTAG   |              | 1155         | <i>Pfcht1</i> ORF confirmation |
| 9455                                                             | CGAGGTACCTTAATGTAAGATTCTACGAAATATTC        |              |              |                                |
| 9489                                                             | GTTGTAAAATTTAATAGTTCATACCATTACC            |              | 1281         | 5' integration                 |
| 9536                                                             | CTCGATGTCCTCAATGACACTTAC                   |              |              |                                |
| 9537                                                             | TGTTTCCTCAACCCCTTTAATCCGAATGA              |              | 1369         | 3' integration                 |
| 9490                                                             | TATTATGAAAATGGTGAATTGACGCTTTAACC           |              |              |                                |
| 4698                                                             | GTTGCTAAACTGCATCGTC                        |              | 1108         | SM                             |
| 4699                                                             | GTTTGAGGTAGCAAGTAGACG                      |              |              |                                |

B

| Template                        | Product | Primers     | Amplicon size |
|---------------------------------|---------|-------------|---------------|
| <b><i>PbΔcht1</i> (3152cl1)</b> | 5'int   | 9489 & 7289 | 1316 bp       |
|                                 | 3'int   | 7922 & 9490 | 1320 bp       |
|                                 | SM      | 4698 & 4699 | 1108 bp       |
|                                 | ORF     | 9530 & 9531 | 1506 bp       |
| <b>Pb-PfCHT1 (r) (3165cl1)</b>  | ORF     | 9454 & 9455 | 1155 bp       |
|                                 | 5'int   | 9489 & 9536 | 1281bp        |
|                                 | 3'int   | 9537 & 9490 | 1369bp        |
|                                 | SM      | 4698 & 4699 | 1108bp        |
