# Supplementary material for: A Hetero-Multimeric Chitinase-Containing Plasmodium falciparum and Plasmodium gallinaceum Ookinete-Secreted Protein Complex Involved in Mosquito Midgut Invasion
Source: Front Cell Infect Microbiol. 2021 Jan 8;10:615343. doi: 10.3389/fcimb.2020.615343 (PMC7821095; doi:10.3389/fcimb.2020.615343)
Supplement: Supplementary Data Sheet 2 — Mass spec data of P. gallinaceum chitinase complex chitin bead pull-down from the serum free samples ookinete culture supernatant. [file Table_2.xlsx]

## Sheet: Peptide List
		DTASelect v2.0.31h
			3.702	81.2	1	R.KESYSIYVY.K
1	Histone 2b		5.012	83.3	2	R.KESYSIYVYK.V
	PF07_0054		4.719	44.2	1	K.VLKQVHPDTGISSK.A
			6.535	80.8	3	K.VLKQVHPDTGISSK.A
			5.377	68.2	4	L.KQVHPDTGISSK.A
			4.997	81.8	5	L.KQVHPDTGISSK.A
			4.55	65	1	K.QVHPDTGISSK.A
			8.792	82.1	1	K.AMGIMNSFVNDIFER.I
			6.222	41.7	3	K.AMGIMNSFVNDIFERIAGEASR.L
			4.098	31	2	K.AMGIMNSFVNDIFERIAGEASR.L
			5.107	92.9	2	S.FVNDIFER.I
			3.816	83.3	1	F.VNDIFER.I
			4.092	62.5	1	R.IAGEASRLAHYNK.R
			4.438	75	1	R.STITSREIQTA.V
			4.318	58.3	1	R.STITSREIQTAVR.L
			3.747	78.6	1	R.EIQTAVRL.L
			5.395	66.7	24	R.EIQTAVRLLLPGELAK.H
			5.383	68.2	6	T.AVRLLLPGELAK.H
			4.653	100	3	K.HAVSEGTK.A
			7.668	90.9	4	K.HAVSEGTKAVTK.Y
			6.573	68.2	2	K.HAVSEGTKAVTK.Y
			5.21	62.5	1	K.HAVSEGTKAVTKY.T
			7.317	64.3	1	K.HAVSEGTKAVTKYTS.S
			7.313	73.3	2	K.HAVSEGTKAVTKYTSS.K
			8.02	54.7	11	K.HAVSEGTKAVTKYTSSK.-
			7.619	56.2	3	K.HAVSEGTKAVTKYTSSK.-
			9.027	71.9	18	K.HAVSEGTKAVTKYTSSK.-
			5.283	81.8	2	E.GTKAVTKYTSSK.-
			4.183	85	2	G.TKAVTKYTSSK.-
			4.702	56.2	1	K.AVTKYTSSK.-
			4.77	87.5	2	K.AVTKYTSSK.-
2	Elongation factor 1 alpha	Pgal0652a04.q1k|1|12-85
	PF13_0305		2.889	70	1	Q.LSGDSALVSLE.P
	PF13_0304		5.762	86.4	1	L.SGDSALVSLEPK.K
	PF11_0245		4.899	68.2	1	L.SGDSALVSLEPK.K
	MAL13P1.164		4.987	44.4	4	L.SGDSALVSLEPKKPMVVET.F
			6.036	44.7	1	L.SGDSALVSLEPKKPMVVETF.T
			6.133	56.7	4	K.KPMVVETFTEYPPLGR.F
			4.372	66.7	1	M.VVETFTEYPPLGR.F
			4.627	56.2	1	T.FTEYPPLGR.F
			4.891	83.3	4	T.FTEYPPLGRF.A
			4.838	75	1	F.TEYPPLGRF.A
			3.335	68.8	2	K.SVEKKEPGAVSSNKPAK.T
			5.099	42.2	1	K.SVEKKEPGAVSSNKPAK.T
		2500308.c000217845.Contig1|5|1102-1178
		Pgal0909g11.q1k|5|83-247
		Pgal0907a05.p1k|6|1-127
		Pgal0529d01.q1k|2|16-101
		Pgal0431a01.p1k|3|18-103
		Pgal0257c02.q1k|3|27-190
3	Hypothetical protein		4.138	57.7	1	K.TLDATNKLDEDSKK.I			3
	PF14_0467		5.071	70	2	L.YENFGSKIDQY.A
			5.482	67.9	1	L.YENFGSKIDQYAEAN.S
			7.245	58.8	3	L.YENFGSKIDQYAEANSID.F
			6.641	75	1	F.GSKIDQYAEANSIDF.E
			4.918	81.8	4	F.EDEMQALDELAK.D
		2500308.c000330497.Contig1|3|472-542
		Pgal0986h02.q1k|4|52-122
		Pgal0859f09.q1k|4|152-222
		Pgal0859f09.p1k|1|144-214
		Pgal0794a10.q1k|3|117-187
		Pgal0591g10.q1k|4|101-171
		Pgal0591g10.p1k|1|115-185								2
		Pgal0271g11.p1k|4|6-76
4	Ribosomal		5.591	29.8	1	I.GGMKVKADRDESSPYAAMMAAQDVAAR.L
	PFE0810c		8.045	73.5	3	R.DESSPYAAMMAAQDVAAR.L
			5.417	65	1	K.TPGPGAQSALR.-
5	Elongation factor 1 alpha	2500308.c000015033.Contig1|1|1748-2205
	as sample 2	2500308.c000015033.Contig1|4|979-1430
			6.131	66.7	1	L.VVIGHVDSGK.S
			6.435	72.2	1	L.VVIGHVDSGK.S
			7.228	83.3	2	L.LIVPAEVGGFEGAFSK.E
			5.825	64.3	1	L.IVPAEVGGFEGAFSK.E
			5.513	82.1	3	L.IVPAEVGGFEGAFSK.E
			4.652	66.7	2	K.QIVVGVNKMDTVK.Y
			2.976	93.8	2	R.YEEIKKEVR.D
			6.666	88.9	1	K.VGYAADKVDF.I
			5.4	50	1	K.VGYAADKVDFIPISGFEGDNL.I
			7.104	75	2	K.VDFIPISGFEGDNLIEK.S
			5.771	88.5	3	F.IPISGFEGDNLIEK.S
			3.664	70	1	L.IEKSDKTPWYK.G
			3.75	66.7	1	K.SDKTPWYKGR.T
			6.438	75	3	R.TLIEALDTMEPPK.R
			4.236	85.7	1	R.IPLQGVYK.I
			5.364	85	3	K.IGGIGTVPVGR.V
			4.285	50	2	K.IGGIGTVPVGR.V
			7.214	65.6	5	K.EVLEEARPGDNIGFNVK.N
			6.095	79.2	2	E.VLEEARPGDNIGF.N
			5.077	60.7	1	K.FTAQVIILNHPGEIK.N
			4.9	85	1	K.FVNIDSKIDKR.S
			4.491	94.4	2	F.VNIDSKIDKR.S
			4.345	77.8	1	R.SGKVVEENPK.A
			5.468	79.2	9	R.SGKVVEENPKAIK.S
			4.313	54.2	1	R.SGKVVEENPKAIK.S
			4.71	62.5	1	R.SGKVVEENPKAIK.S
			4.381	83.3	1	K.VVEENPKAIK.S
			5.762	86.4	1	K.SGDSALVSLEPK.K
			4.899	68.2	1	K.SGDSALVSLEPK.K
			4.987	44.4	4	K.SGDSALVSLEPKKPMVVET.F
			6.036	44.7	1	K.SGDSALVSLEPKKPMVVETF.T
			6.133	56.7	4	K.KPMVVETFTEYPPLGR.F
			4.372	66.7	1	M.VVETFTEYPPLGR.F
			4.627	56.2	1	T.FTEYPPLGR.F
			4.891	83.3	4	T.FTEYPPLGRF.A
			4.838	75	1	F.TEYPPLGRF.A
			3.335	68.8	2	K.SVEKKEPGAVSSNKPAK.T
			5.099	42.2	1	K.SVEKKEPGAVSSNKPAK.T
6		Pgal0307b12.q1k|3|14-105
			5.402	85.7	3	A.LSDLHAHK.L
	No matching with Pf		3.814	64.3	1	K.LRVDPVNF.K
			4.431	92.9	2	L.RVDPVNFK.L
		*	6.171	60	1	F.TPAVHASLDKF.L
		*	4.677	85	1	F.LASVSTVLTSK.Y
		*	6.276	58.3	1	F.LASVSTVLTSKYR.-
		2500308.c000219735.Contig1|1|473-854
7	PgCHT2	PgCHT2
			3.766	75	2	R.ELIKSYKER.E
			4.326	75	1	R.ELIKSYKER.E
			4.314	70	1	R.EHGIIQGYYPS.W
			5.058	77.3	2	R.EHGIIQGYYPSW.V
			4.404	68.2	2	F.AKLDLSYDDINS.I
			5.287	28.7	1	F.AKLDLSYDDINSIITTPSLFKSLIGLEY.I
			7.951	54.5	4	M.ILSLGGENYQPSSLDAALNSTEK.I
			7.262	52.5	2	L.SLGGENYQPSSLDAALNSTEK.I
			4.594	81.2	1	L.NSTEKIANL.V
			3.54	77.8	1	Y.FQNPSVKPEL.L
			4.694	63.6	2	Y.FQNPSVKPELLR.G
			5.962	67.6	3	F.VQTFNYNNTNDPSIIHEL.Y
			4.151	75	1	M.FSDNPFKPNDK.A
			5.137	77.3	1	M.FSDNPFKPNDKA.Y
			5.126	80	1	A.YVKSIGDTIKK.Q
			3.748	70	1	K.SIGDTIKKQNK.L
			5.219	83.3	1	K.LNKAADGLGL.W
			6.137	90	1	K.LNKAADGLGLW.S
			10.055	37.1	4	K.LNKAADGLGLWSLSNNLAVFNENEVIQNFVEALH.-
			4.514	50	1	K.AADGLGLWSLSNNL.A
			4.916	65.4	1	K.AADGLGLWSLSNNL.A
			5.825	50	1	K.AADGLGLWSLSNNLAVF.N
			6.571	52.8	1	K.AADGLGLWSLSNNLAVFNE.N
			5.482	42.1	1	K.AADGLGLWSLSNNLAVFNEN.E
			9.008	35.8	1	K.AADGLGLWSLSNNLAVFNENEVIQNFVEALH.-
			5.385	33.3	1	D.GLGLWSLSNNLAVFNENEVIQNFVEALH.-
			7.768	32.4	1	D.GLGLWSLSNNLAVFNENEVIQNFVEALH.-
			3.904	72.2	1	L.WSLSNNLAVF.N
			4.809	55.9	1	W.SLSNNLAVFNENEVIQNF.V
			7.318	66.7	1	L.SNNLAVFNENEVIQNF.V
			4.382	70.8	1	N.LAVFNENEVIQNF.V
			4.337	77.3	2	L.AVFNENEVIQNF.V
			6.315	88.5	4	F.NENEVIQNFVEALH.-
			3.542	75	1	N.EVIQNFVEALH.-
			4.409	88.9	2	E.VIQNFVEALH.-
8	Elongation factor	Pgal1114h05.q1k|4|117-173
			5.619	70.8	3	R.VETGVLKPGMVVT.F
			4.688	61.5	2	R.VETGVLKPGMVVTF.A
			8.192	54.3	1	R.VETGVLKPGMVVTFAPVNVTTEVK.S
			5.519	35.9	1	R.VETGVLKPGMVVTFAPVNVTTEVK.S
			3.792	61.1	1	F.APVNVTTEVK.S
			6.738	88.9	2	F.APVNVTTEVK.S
9	WRAP	2500308.c000115995.Contig1|3|440-742
			6.28	69.2	1	T.YEKLNVISHSSVSR.L
			4.842	85	1	E.KLNVISHSSVS.R
			4.401	83.3	1	W.IKGTIPFLES.M
			4.967	54.2	1	F.DRDQRLLVPFTDE.I
			5.862	79.2	4	R.LLVPFTDEISQDK.Q
			5.511	64.3	5	R.LLVPFTDEISQDKQK.L
			5.375	75	1	K.LIEKVKGINDVAR.G
			4.059	54.5	1	L.IEKVKGINDVAR.G
			4.172	87.5	1	K.VKGINDVAR.G
			4.801	65.4	1	K.VKGINDVARGPDTL.Y
			5.306	72.7	1	K.GINDVARGPDTL.Y
			5.177	50	1	K.GINDVARGPDTLYVY.A
			6.524	77.3	5	Y.ALENVIFGDGTR.S
			7.112	65.4	3	Y.ALENVIFGDGTRSD.A
			5.471	65.6	5	Y.ALENVIFGDGTRSDAPK.V
			5.783	55.6	1	F.YYGYDYGANKSLIPDIVED.Y
			7.259	70	2	F.VIPAAEQVKER.I
			5.504	83.3	3	K.SSMIQKVVYK.-
10	Enlolase	2500308.c000215337.Contig1|3|717-1156
	PF10_0155		5.871	75	1	F.RAAVPSGASTGIYEA.L
			8.39	70.6	3	R.AAVPSGASTGIYEALELR.D
			3.505	81.2	1	K.NITNVIAPK.L
			4.348	77.3	1	R.AGAAANKISLYK.Y
			4.391	59.1	1	L.NVINGGSHAGNK.L
			5.825	55.9	1	L.NVINGGSHAGNKLAFQEF.M
			4.482	50	1	R.YGAEVYHTLK.S
			6.009	88.9	3	R.YGAEVYHTLK.S
		*	6.957	23.7	1	K.YGIDATNVGDEGGFAPNILNAVEALDLLVDAIKTAGYEGK.V
			6.174	60.7	2	S.IEDPFDQDDWENYAK.L
			4.131	79.2	3	K.AIGKTVQIVGDDL.L
			8.133	76.7	3	K.TVQIVGDDLLVTNPAR.I
			4.385	61.1	1	L.LVTNPARINK.A
			4.379	56.2	1	R.IEESLGNNAIYAGENFR.H
			7.421	78.1	6	R.IEESLGNNAIYAGENFR.H
			6.293	47.5	1	R.IEESLGNNAIYAGENFRHQLD.-
11	Hypothetical protein	2500308.c000014768.Contig1|1|733-828
	PF11_0055	Pgal0324e10.q1k|5|69-164
			5.83	84.6	1	K.LNEDLIATQENIEK.L
			4.97	60.7	1	K.GQVLPEFIQDNENNK.T
			3.776	72.7	1	F.IQDNENNKTNEK.D
			3.658	75	2	F.IQDNENNKTNEKDEL.-
		2500308.c000336589.Contig1|2|378-505
12	Histone 2B	Pgal0324g01.p1k|4|67-194
			3.121	85.7	3	F.INDIFDRL.V
			4.499	63.6	1	R.TLSSREIQTAVR.L
			3.747	78.6	1	R.EIQTAVRL.L
			4.638	53.3	1	R.EIQTAVRLLLPGELSK.H
			3.526	63.6	2	T.AVRLLLPGELSK.H
			4.653	100	3	K.HAVSEGTK.A
			7.668	90.9	4	K.HAVSEGTKAVTK.Y
			6.573	68.2	2	K.HAVSEGTKAVTK.Y
			5.21	62.5	1	K.HAVSEGTKAVTKY.T
			5.796	50	1	K.HAVSEGTKAVTKYTT.S
			6.631	63.3	1	K.HAVSEGTKAVTKYTTS.G
			6.42	53.1	1	K.HAVSEGTKAVTKYTTSG.G
			8.02	67.6	4	K.HAVSEGTKAVTKYTTSGG.-
			4.696	61.1	2	K.AVTKYTTSGG.-
13	Heat Shock Pro 70	2500308.c000114677.Contig1|2|404-711
		*	6.989	84.6	1	R.NENVDIIANDQGNR.T
	PF08_0054	*	6.291	50	2	R.NENVDIIANDQGNRTTPSYVAF.T
	MAL7P1.228	*	5.884	69.2	1	K.NQVARNPENTVFDA.K
		*	4.221	53.3	1	K.NQVARNPENTVFDAKR.L
		*	5.188	41.7	1	K.NQVARNPENTVFDAKR.L
			5.59	77.8	1	R.NPENTVFDAK.R
			4.885	88.9	1	R.NPENTVFDAK.R
			6.127	80	2	R.NPENTVFDAKR.L
		*	6.305	90	1	K.FTESSVQSDMK.H
			6.319	68.8	6	K.AGVDEKPMIEVTYQGEK.K
			5.494	90	3	K.MKENAEAFLGK.S
			5.351	68.2	1	K.ENAEAFLGKSIK.N
			3.988	67.9	3	K.NAVITVPAYFNDSQR.Q
			4.674	55.6	2	F.NDSQRQATKDAGTIAGLNV.M
			4.27	63.6	1	K.DAGTIAGLNVMR.I
			6.844	95.5	4	K.DAGTIAGLNVMR.I
14	Aminopeptidase	2500308.c000215572.Contig2|1|12-145
	MAL13P1.56	Pgal0977g04.q1k|4|66-259
		Pgal0927a12.q1k|5|1-268
		Pgal0562h05.q1k|4|1-261
		Pgal0561h01.q1k|5|3-249
		Pgal0550f07.q1k|1|12-145
		Pgal0544a09.p1k|5|1-224
		Pgal0544a09.p1kw|5|1-282
		Pgal0368h11.p1k|2|14-184
		2500308.c000326303.Contig1|3|1190-1426
			7.689	69.2	1	R.GGPIGSGGNTSQEK.K
			7.54	68.8	3	K.LSSESLDPSAFDDITTR.E
			5.339	53.1	1	R.EDDSGNNESGDNKVVPK.I
15	Phosphoglycerate mutase	2500308.c000114737.Contig1|2|94-308
	PF11_0208		5.054	66.7	1	L.NERHYGSLQGLNK.S
			4.778	77.8	1	R.HYGSLQGLNK.S
			6.06	77.8	2	R.HYGSLQGLNK.S
			8.131	71.4	1	R.HYGSLQGLNKSETAK.K
		*	3.814	91.7	1	K.YGEEQVK.I
		*	5.624	72.2	2	K.YGEEQVKIWR.R
		*	3.851	83.3	1	R.RSYDIPPPKL.D
		*	3.559	68.2	1	R.RSYDIPPPKLDK.E
		*	4.541	87.5	1	R.SYDIPPPKL.D
		*	4.399	65	1	R.SYDIPPPKLDK.E
			3.856	50	1	K.VLVSAHGNSLR.G
			5.57	80	2	K.KKMDEVANQGK.A
			4.679	81.8	1	K.KMDEVANQGKAK.-
			4.904	87.5	1	K.MDEVANQGK.A
			5.423	85	1	K.MDEVANQGKAK.-
16		Pgal0070h05.q1k|1|6-119
	NO matching	*	4.654	22.7	1	P.LLLHLPAASAPPSLPAASAPPSLPAASAPQHTAV.P
		*	5.225	50	1	L.PAASAPPSLPAASAPPSLPAA.S
17	Gamete antigen 27/25	Contig207|5|2248-2467
	PF13_0011		5.865	75	3	M.VGLQENNLVEQGAPK.R
			4.339	50	1	M.VGLQENNLVEQGAPK.R
			5.734	63.3	1	M.VGLQENNLVEQGAPKR.D
			6.6	68.8	1	M.VGLQENNLVEQGAPKRD.D
			6.197	85	2	K.AIVEEIVETEK.H
			4.823	77.8	1	K.SFLHDDVAYR.V
			3.905	80	2	F.FTSALNIIPSK.D
			3.926	88.9	2	F.TSALNIIPSK.D
			6	31.2	1	F.TSALNIIPSKDLPLHPDDDNPPPHN.-
			5.145	47.5	1	L.NIIPSKDLPLHPDDDNPPPHN.-
			6.108	67.9	1	K.DLPLHPDDDNPPPHN.-
			5.609	69.2	1	D.LPLHPDDDNPPPHN.-
18	Ribosomal Protein	2500308.c000330497.Contig1|3|256-316
	PFE0810c	Pgal1082e09.p1k|4|25-85
		Pgal0271g11.q1k|3|100-160
			5.767	46.9	1	K.VKTPQPETAVVSGPQAK.E
			7.664	71.4	1	K.TPQPETAVVSGPQAK.E
19	Hypothetical protein	2500308.c000115606.Contig1|5|2176-2316
	PFE0945c	Pgal0524d04.q1k|6|29-169
			5.455	26	1	C.EKTEILPLGDILSGVADIANVVSGK.N
			5.882	21.1	1	C.EKTEILPLGDILSGVADIANVVSGKNENVTNVVSESTPK.I
20	GTP binding ran/tc4	2500308.c000114818.Contig1|5|305-502
	PF11_0183	Pgal0336f02.p1k|3|9-176
			6.621	83.3	2	K.TQFNVWDTAGQEK.F
			5.388	80	1	Q.FNVWDTAGQEK.F
			4.221	83.3	1	R.NLQYYDLSAR.S
			3.561	72.2	2	R.SNYNFEKPFL.W
			5.807	42.5	1	R.EAEKELEQAAAVAIDEEDIEN.-
21	RNA DNA binding protein	2500308.c000330197.Contig1|3|282-389
	PF10_0063	Pgal1053h09.q1k|2|73-167
			7.757	31.7	1	K.NPFDEVIITGLGSATKIAIGAASIMEK.E
			4.467	90	2	K.IAIGAASIMEK.E
22	Chitinase	Contig274|1|1563-2153
	PFL2510w		3.774	58.3	1	K.GKNNINNSLGIIR.E
	PgCHT1		4.514	90	4	K.NNINNSLGIIR.E
			4.116	61.5	1	K.NNINNSLGIIRENK.N
			3.511	77.8	5	R.QILEEYKKRK.Q
			7.842	65.6	4	K.QGIIAGYYGSWNSQGDR.A
			6.293	38.9	1	K.QGIIAGYYGSWNSQGDRAK.H
			5.273	94.4	1	Y.YGSWNSQGDR.A
			5.945	44.1	3	F.DLDGVDIDWEPHGSFNNL.N
			4.489	40.5	1	F.DLDGVDIDWEPHGSFNNLNELN.F
			3.653	83.3	1	F.SNYYIKL.I
			5.394	80	1	K.DEESPYNTKFL.S
			3.078	77.8	1	K.FLSEQIETNK.E
			3.857	72.2	1	F.INIFNTAKEK.I
			4.181	64.3	1	K.ELLELVGK.T
			4.792	61.1	1	F.MKEQLPTGSF.D
			6.53	94.4	1	F.MKEQLPTGSF.D
			5.652	75	2	Y.YKHNDAIWK.T
			6.269	70	2	W.WQQGPPEGQALESYTK.L
23	Pfs230	Pgal0921d04.q1k|4|1-265
	PFB0405w		6.191	70.8	1	K.ENTVVEYTANLSR.W
			4.669	66.7	1	K.LIIKYPTTEK.A
			5.207	58.8	2	K.NEPINIDNILPGSIILDK.Y
		*	5.769	69.2	2	K.LTDISTNAEHDFIK.Q
		*	5.951	86.4	1	F.IKQNNLGHSLSY.I
		2500308.c000113972.Contig1|1|112-219
24	Ribosomal Protein	Pgal0875c09.p1k|4|146-253
	PFB0830w	Pgal0602f12.p1k|3|18-105
		Pgal0349d12.q1k|6|1-110
			3.915	68.2	1	F.NIRNIVDASAQR.D
			6.176	59.1	2	K.EASVYSTFQLPK.L
25	Ribosomal Protein	2500308.c000436329.Contig1|3|742-983
	PF10_0264		6.536	83.3	1	K.FAQYTGAQAIAGR.W
			6.193	41.7	1	K.NLANEENAATAPHLVENQF.A
			6.711	46.9	1	L.ANEENAATAPHLVENQF.A
		*	5.508	47.4	3	K.EEWNDNTNEDWKNPITADEW.-
26	Actin depolymerize factor	2500308.c000111970.Contig2|5|566-630
	PFE0165w	Pgal1091b08.q1k|3|93-157
		Pgal0928f10.p1k|1|17-68
		Pgal0903f06.q1k|4|72-136
			7.099	80.8	4	L.TSVIEGVQDVADFK.-
			6.862	75	2	T.SVIEGVQDVADFK.-
27	Pfs230	Pgal0904f09.q1k|5|8-251
			6.397	85	1	K.NATAISNTEYK.E
			6.191	70.8	1	K.ENTVVEYTANLSR.W
			4.669	66.7	1	K.LIIKYPTTEK.A
			5.207	58.8	2	K.NEPINIDNILPGSIILDK.Y
28	Ribosomal L27	Pgal0697a03.q1k|5|42-117
		Pgal0930h05.q1k|6|76-164
		Pgal0755g07.p1k|4|195-264
			4.938	50	2	R.AGKKAVVINTIETQTR.E
			5.563	66.7	1	K.KAVVINTIETQTR.E
29	Histone H4	2500308.c000332237.Contig1|6|258-362
	PF11_0061	Pgal1171f06.q1k|6|59-163
		Pgal0942b12.q1k|5|64-168
		Pgal0267e05.p1k|6|59-163
			4.901	63.6	1	R.DNIQGITKPAIR.R
			4.677	81.8	5	R.DNIQGITKPAIR.R
			4.884	94.4	1	R.ISGLIYEEIR.G
		2500308.c000218885.Contig1|2|932-1056
30	Histone 2b	Pgal0715g11.q1k|2|63-199
			5.59	83.3	1	R.YDSYGLYIFK.V
			4.653	100	3	K.HAVSEGTK.A
			7.668	90.9	4	K.HAVSEGTKAVTK.F
			6.573	68.2	2	K.HAVSEGTKAVTK.F
			5.877	75	1	K.HAVSEGTKAVTKF.T
			6.977	57.1	1	K.HAVSEGTKAVTKFTS.K
			4.476	85.7	1	K.AVTKFTSK.-
31	Heat shock 86	2500308.c000331611.Contig1|5|454-947
	PF07_0029		8.151	76.7	2	K.TNNTLTIEDSGIGMTK.N
			4.18	81.8	4	K.NDLINNLGTIAR.S
			4.438	83.3	1	K.DDQLEYLEEK.R
			3.741	88.9	1	K.KEETEEDKEK.K
			5.606	36.4	3	K.KEDNEEDKTDHPKVEDVTEELEK.A
			5.257	55.6	1	K.VEDVTEELEK.A
			7.014	82.1	2	R.KPEEVTNEEYASFYK.S
			4.436	72.7	1	F.YKSLTNDWEDHL.A
			6.283	79.2	2	K.SLTNDWEDHLAVK.H
32	Actin	2500308.c000219765.Contig1|1|202-586
	PFL2215w		7.061	63.2	2	L.VVDNGSGNVKAGVAGDDAPR.S
			5.644	83.3	1	K.AGVAGDDAPR.S
			5.767	70	1	K.DAFVGDEAQTK.R
			5.137	85	2	K.DAFVGDEAQTK.R
			5.31	77.3	1	K.DAFVGDEAQTKR.G
			5.507	75	2	H.GIVTNWDDMEK.I
			5.066	72.2	1	G.IVTNWDDMEK.I
			7.311	64.7	3	R.AAPEEHPVLLTEAPLNPK.G
			3.08	78.6	1	A.PEEHPVLL.T
			6.637	66.7	2	A.PEEHPVLLTEAPLNPK.G
			4.171	60	1	L.TEAPLNPKGNR.E
			5.575	62.5	1	Y.DESGPSIVHRKCF.-
32	Actin	2500308.c000114948.Contig1|2|70-194
	PFL2215w	Pgal0393e07.p1k|3|28-152
		Pgal0390e06.p1k|2|15-130
			4.002	87.5	5	R.AGLQFPVGR.V
			6.191	73.1	1	Y.LTAEVLELAGNATK.D
33	Histone h2A	2500308.c000015104.Contig1|4|202-258
		Pgal1024e05.p1k|2|24-80
		Pgal0585d02.q1k|6|10-66
			6.253	94.4	3	K.NLGDVVLHDF.R
			4.433	55.6	1	K.NLGDVVLHDF.R
34	Oxidoreductase	Pgal1050f02.q1k|5|105-161
	PF!3_0144	*	4.707	66.7	1	I.GDEELDTLIK.A
		*	4.339	83.3	1	I.GDEELDTLIK.A
35	Ribosomal S14	2500308.c000330497.Contig1|2|522-611
	PFE0810c	Pgal0986h02.q1k|6|101-190
		Pgal0713d04.q1k|3|25-114
		Pgal0271g11.p1k|6|55-144
			4.901	75	1	R.IEDVTPIPTDSTR.K
			4.667	57.1	2	R.IEDVTPIPTDSTRKK.S
36	HSP 70	2500308.c000217676.Contig1|5|193-825
	PFI10875w		3.657	75	1	R.VEILNNELGNR.I
			4.814	66.7	1	R.ITPSYVSFVDGER.K
			4.779	68.2	3	K.LEATLHPSQTVF.D
			5.167	67.9	1	K.LEATLHPSQTVFDVK.R
			5.757	66.7	2	K.DTTFAPEQISAMVLEK.M
			5.152	86.4	1	K.EIAQSFLGKPVK.N
			5.339	67.9	1	K.NAVVTVPAYFNDAQR.Q
			5.432	95.5	1	K.DAGTIAGLNIVR.I
			4.272	75	1	K.NNLDNYVQSMR.A
37	NO Matching in PF	Pgal0926e01.p1k|5|36-129
		Pgal0926e01.q1k|3|35-128
			7.055	65.4	2	R.MSEFTTNLTEEEEK.S
			4.651	83.3	1	F.TTNLTEEEEK.S
38	HSP 70	2500308.c000114677.Contig1|1|676-1077
	PF08_0054		4.13	78.6	1	K.DNNLLGKF.H
			7.543	85.7	4	F.DIDANGILNVTAVEK.S
		*	4.846	73.1	1	K.STGKQNHITITNDK.G
		*	5.841	80	1	R.NSLENYCYGVK.S
			3.119	75	1	K.SSLEDQKIKEK.L
39	HSP 86	2500308.c000215525.Contig1|3|53-320
	PF07_0029	Pgal0846a03.p1ka|4|1-252
		Pgal0787f07.q1k|6|1-151
		Pgal0787f07.p1k|2|16-141
		Pgal0535f11.q1k|1|14-197
		Pgal0266c04.p1kw|5|1-216
			5.245	75	1	R.DNSMTSYMLSK.K
			4.264	66.7	1	F.ALEEPTIFSK.R
			5.016	60	1	D.IELPPLEETVEGTDSK.M
40	Ribosomal S13	2500308.c000113899.Contig1|5|746-898
	PF13_0316	Pgal1112e07.p1k|5|82-241
		Pgal0930f06.q1k|2|36-201
		Pgal0930f06.p1k|6|36-201
		Pgal0927a07.q1k|2|35-200
		Pgal0419g09.q1k|5|72-231
			5.149	70.8	1	K.KGQTPSQIGATLR.D
			3.835	78.6	2	S.VTGNKILR.I
		2500308.c000218203.Contig1|5|942-1259
41	Tubulin beta chain	Pgal0538b10.q1k|5|1-284
	PF10_0084		6.719	81.8	1	R.VDVFYNEATGGR.Y
			5.212	70.8	1	F.VFGQTGAGNNWAK.G
			4.849	64.3	1	R.ALTVPELTQQMFDAK.N
42	DNA/RNA binding	2500308.c000115893.Contig1|3|438-687
	PF08_0074	Pgal1019f09.q1k|5|12-253
		Pgal0983g08.p1k|4|1-174
		Pgal0784b04.p1k|6|1-221
			5.025	69.2	1	Y.VSGQDNNEHVVQEK.T
			5.652	62.5	1	R.DQLDTKDAGYQPPLDEK.Y
43	NO matching	Pgal0605a03.p1k|3|7-248
		*	2.912	66.7	1	N.FIKSIIILSSCLI.K
			3.694	53.6	1	N.NLKLSKALKKANSLN.P
44	Disulphide isomerase	Contig122|5|306-730
		Pgal0967d05.p1k|6|1-193
			3.719	92.9	1	F.FKDVEEGK.I
			6.636	75	1	F.VKAGSKVPLPYEGER.T
			5.367	30	1	F.LNKHATNTPISIEGVSQDTDGSEEEL.-
			7.152	52.3	2	K.HATNTPISIEGVSQDTDGSEEEL.-
45	HYPO	2500308.c000115615.Contig1|2|729-869
	PFL0280c	Pgal1181d09.p1k|4|45-185
		Pgal1151d02.q1k|5|11-151
		Pgal0899c02.q1k|1|44-184
		Pgal0755g12.q1k|3|6-122
		Pgal0558b11.p1k|1|18-143
		Pgal0438g07.q1k|6|45-185
			4.072	65.4	1	R.DTYDDVQIQINDLK.R
			6.517	67.9	1	R.DTYDDVQIQINDLKR.Q
46	Oxidoreductase	2500308.c000015104.Contig1|6|584-746
	PF13_0144	Pgal1181c11.q1k|2|115-277
		Pgal0553c01.q1k|6|1-82
		Pgal0553c01.p1k|3|10-73
			5.567	62.5	4	L.FENYKHEAVVDEETKPN.-
			4.307	61.5	1	N.YKHEAVVDEETKPN.-
			8.648	86.4	1	K.HEAVVDEETKPN.-
47	Transport Protein	2500308.c000331083.Contig1|4|153-1014
	PF11_0466	*	7.805	66.7	2	K.DTAEEFGDVSSGEHPK.Q
			4.929	81.8	1	K.DDLINNLGTIAK.S
			3.992	63.6	2	K.SGTSNFLEAISK.S
			3.711	70	1	K.LMNEQKPIWLR.S
			6.376	70	2	F.VKGVVDSDDLPLNVSR.E
			5.483	61.5	1	K.GVVDSDDLPLNVSR.E
			7.141	69.4	3	K.NFEEGNEESENLHSANEEL.-
48	HYP0	2500308.c000215348.Contig1|5|1023-1254
	PFF1045w	Pgal1125e08.p1k|5|1-232
		Pgal0623a07.q1k|3|1-162
		Pgal0303a05.q1k|5|1-206
			5.089	77.8	1	K.SSSDLEKYLK.S
			5.379	58.3	1	K.SKEFSGSVMNTLY.D
49	elongation factor 2	2500308.c000011614.Contig1|2|458-1291
	PF14_0486		6.032	72.7	1	R.NMSVIAHVDHGK.S
			4.058	83.3	1	K.STLTDSLVSK.A
			5.362	60	1	L.VSKAGIISSKNAGDAR.F
			5.924	75	2	K.AGIISSKNAGDAR.F
		*	5.182	75	1	R.VFSGTVATGQK.V
		*	4.517	66.7	1	R.VFSGTVATGQKVR.I
			4.998	92.9	1	K.YSVSPVVR.V
			5.671	88.5	5	K.AYPLAEGLAEAIDK.N
			5.204	83.3	2	M.PSLDQYLDKL.-
50	Ribosomal L3	2500308.c000330099.Contig1|4|79-474
	PF10_0272		4.966	81.2	2	R.HGSLGFLPR.K
			3.826	92.9	1	K.AGMTHIVR.E
			4.55	65	1	L.LEKNLPVSTVF.N
			3.571	88.9	1	R.EALSQVALKF.I
51	Pf gamete 27/25	2500308.c000115663.Contig1|6|760-987
	PF13_0011	Pgal1153g09.p1k|6|52-279
		Pgal0939h06.p1k|5|4-134
		Pgal0596h03.p1k|6|13-159
		Pgal0394h01.p1k|5|1-152
		2500308.c000215504.Contig1|5|517-744
			4.744	64.3	1	K.EIYSAEDK.A
			4.611	68.2	1	F.FETCNKEGNLER.K
52	ribosomal	2500308.c000441994.Contig1|6|102-272
	PFD1055w	Pgal1013h12.p1k|6|70-240
		Pgal0504f10.p1k|1|31-201
		Pgal0342d11.p1k|3|12-150
			5.13	70.8	1	R.RLTTKGENAINNF.A
			6.441	80.8	3	R.LTTKGENAINNFAR.Y
			5.605	88.9	1	K.GENAINNFAR.Y
53	Hypo
	PFE077ow	Pgal0814h07.p1k|4|9-206
			4.8	75	1	R.STPDNEVLVAR.V
			5.927	81.8	1	K.SLDEIQTYVTNK.L
54	ribo P0	Contig206|3|1969-2286
	PF11_0313		5.048	83.3	1	K.LSTLIQQYTK.I
			7.748	80	1	Y.VAAAPAASATKTEEPK.K
55	Plasmepsin	Contig164|4|3256-3716
	6,7, 1-4		4.498	46.4	1	F.YGEAEVGDDKQKFTF.I
			4.515	93.8	1	F.TVFDYDNER.V
			7.736	68.2	2	F.TVFDYDNERVGF.A
			4.926	93.8	2	R.VGFAVAKNL.-
56	Transmission bl Precur	2500308.c000331825.Contig1|3|1-293
	PF13_0247	*	5.168	88.9	1	K.IAQNSFNNSK.L
		*	5.266	83.3	2	K.GSFGEVILSR.D
57	PfG377	2500308.c000015072.Contig1|4|426-2957
	PFL24056		5.636	47.2	1	L.FETDGVMPEPLVADGSASK.I
			5.647	52.9	1	F.ETDGVMPEPLVADGSASK.I
			5.119	73.1	2	K.TLPIGGEEGKLTPK.E
			6.457	68.8	3	K.EEELVDINEETGIGVPK.E
			5.892	79.2	1	L.VDINEETGIGVPK.E
			4.763	64.7	2	L.VDINEETGIGVPKEIAEK.E
			5.425	40	1	L.VDINEETGIGVPKEIAEKEAK.E
			4.628	72.7	1	K.LPEYTEPTTSDK.E
			7.384	71.4	4	L.SELQAHEEVEEEEER.R
			4.687	93.8	1	H.EEVEEEEER.R
			5.952	73.1	1	R.KGAGIDDDAPEFLK.E
			5.557	75	1	K.GAGIDDDAPEFLK.E
			5.562	81.8	1	K.GEIESEFTEIQK.K
			7.165	66.7	2	K.VLESNLSGISSDTPGK.A
			4.483	87.5	1	R.VDITGIMDK.K
			4.229	77.8	1	K.VEAYLAKPIL.L
			3.078	65	1	K.NKNIIEDTYEK.L
			3.803	59.1	1	F.FTNEEVPLEQKL.L
58	Keratin	contaminant_KERATIN22
		*	7.833	57.9	1	R.GSSSGGGYSSGSSSYGSGGR.Q
		*	8.972	52.3	1	R.GGSGGGGSISGGGYGSGGGSGGR.Y
59	TBA precursor	2500308.c000115335.Contig1|6|26-493
	PF13_0247		3.883	75	1	G.DEEYISPNDLGNK.I
			4.307	50	1	G.DEEYISPNDLGNKISGF.L
			4.891	50	2	G.DEEYISPNDLGNKISGFLG.Y
			4.253	68.2	1	L.TNDSFPYLKNPK.S
60	Tubulin beta chain	2500308.c000219849.Contig1|2|142-533
	PFD1050w	2500308.c000326406.Contig2|6|972-1287
		2500308.c000219851.Contig1|3|339-727
			5.397	90.9	3	F.VDLEPTVVDEVR.T
			6.166	83.3	1	K.DVNAAVATIKTKR.T
61	Kinase	2500308.c000014959.Contig1|6|649-1076
	PFI1105w		3.716	70.8	2	R.VDFNVPIDNGIIK.D
			4.05	81.8	1	G.KQLPGVQALSNK.-
62	Translation factor	2500308.c000218755.Contig1|6|412-896
	PF14_0104	Pgal1011f03.p1k|5|1-282
			3.694	75	1	K.DKLAEQNLENL.D
			6.212	71.4	1	K.DKLAEQNLENLDVTK.L
			5.68	75	1	L.DVTKLTPLSEDVISR.Q
			4.904	80	1	K.LTPLSEDVISR.Q
63	Pfs230	2500308.c000333167.Contig1|3|67-934
	PFB0405w		7.773	52.4	1	E.DEPHEIDDTIDGGYETTEDGDL.S
			3.391	87.5	2	K.FDNIDYFPK.K
			5.186	69.2	1	K.SITDLINNSVIYNK.E
64	HyPO	2500308.c000115927.Contig1|4|68-568
	PF14_0096	Pgal1127c10.q1k|2|17-272
			4.539	88.9	1	Y.NLQNTANQQR.T
			3.979	65.4	1	F.VSYDNVDSAINAVK.Y
65	Ligase	2500308.c000218146.Contig1|1|1304-1909
	PFE0475w	Pgal0389h07.p1k|4|8-223
			3.969	75	1	K.TVAAMDVLAPK.I
			5.056	53.3	3	K.IGEIVGGSQREDNLEL.L
66	t-complex protein	2500308.c000215626.Contig1|4|308-821
	PFL1425w	Pgal0937f09.q1k|4|1-220
			5.714	72.2	1	R.EVDVAHPAAK.S
			3.665	70.8	1	K.VEKIPGGEITDSY.V
67	Hsp 60	2500308.c000218563.Contig1|1|82-628
	PF10_0153		3.545	83.3	1	K.LANLGAQMVK.Q
			4.983	68.2	1	K.LDDPQVVSYLGK.A
68	Poly A binding P	Contig262|1|430-1227
	PFL1170w		4.421	70.8	1	L.YIKNLDDAIDDQM.L
			5.967	86.4	1	K.NLDDAIDDQMLR.E
			5.738	50	1	F.SQNTLSYGRPVITAF.N
69	Hypo	2500308.c000016362.Contig1|2|192-1480
			4.28	81.2	1	K.TYKPLIEEF.Y
			8.261	50	2	F.YSGESSSLKTISDTSIQKENNF.I
			5.038	31	2	F.YSGESSSLKTISDTSIQKENNF.I
70	Hypo	2500308.c000115183.Contig1|5|1-1262
			4.305	68.2	1	K.EDDFSYQNVFDK.N
			4.095	57.1	1	R.GHFGIVSK.S
71	Hypo	2500308.c000217771.Contig1|3|48-1934
			6.307	73.1	1	K.VTILFTDGNDNVAK.D
			4.884	72.7	1	K.TYVKPFAINTVK.Q
		Unfiltered
		Filtered
		Forward matches
		Decoy matches
		Forward FP rate
		Classification
		Unclassified
