# Supplementary material for: A Hetero-Multimeric Chitinase-Containing Plasmodium falciparum and Plasmodium gallinaceum Ookinete-Secreted Protein Complex Involved in Mosquito Midgut Invasion
Source: Front Cell Infect Microbiol. 2021 Jan 8;10:615343. doi: 10.3389/fcimb.2020.615343 (PMC7821095; doi:10.3389/fcimb.2020.615343)
Supplement: Supplementary Data Sheet 5 — Mass spec data of Pb-PfCH1 (r) chitin bead pull-down samples from the samples from ookinete culture supernatant. [file Table_5.xlsx]

## Sheet: Total protein identified
MS/MS View:1222 Proteins in 1016 Clusters<BR>With 6 Decoys and 9 Filtered Out	Accession Number	Alternate ID	Molecular Weight	Pb-PfCHT1; Total Spectral count
Complement C3 OS=Mus musculus OX=10090 GN=C3 PE=1 SV=3	P01027	C3	186 kDa	777
Apolipoprotein B-100 OS=Mus musculus OX=10090 GN=Apob PE=1 SV=1	E9Q414	Apob	509 kDa	748
Apolipoprotein A-I OS=Mus musculus OX=10090 GN=Apoa1 PE=1 SV=2	Q00623	Apoa1	31 kDa	518
Murinoglobulin-1 OS=Mus musculus OX=10090 GN=Mug1 PE=1 SV=3	P28665	Mug1	165 kDa	356
Hemoglobin subunit beta-1 OS=Mus musculus OX=10090 GN=Hbb-b1 PE=1 SV=2	P02088	Hbb-b1	16 kDa	418
Hemoglobin subunit alpha OS=Mus musculus OX=10090 GN=Hba PE=1 SV=2	P01942	Hba	15 kDa	317
Serum albumin OS=Mus musculus OX=10090 GN=Alb PE=1 SV=3	P07724	Alb	69 kDa	282
Murinoglobulin-2 OS=Mus musculus OX=10090 GN=Mug2 PE=1 SV=2	P28666	Mug2	162 kDa	267
| organism=Plasmodium_berghei_ANKA | product=chitinase (CHT1) | location=berg08:17568-19514(+) | length=648 | sequence_SO=chromosome | SO=protein_coding	PBANKA_080050		72 kDa
Pregnancy zone protein OS=Mus musculus OX=10090 GN=Pzp PE=1 SV=3	Q61838	Pzp	166 kDa	257
Hemoglobin subunit beta-2 OS=Mus musculus OX=10090 GN=Hbb-b2 PE=1 SV=2	P02089	Hbb-b2	16 kDa	275
Complement factor H OS=Mus musculus OX=10090 GN=Cfh PE=1 SV=2	P06909	Cfh	139 kDa	232
Gelsolin OS=Mus musculus OX=10090 GN=Gsn PE=1 SV=3	P13020	Gsn	86 kDa	192
Complement C4-B OS=Mus musculus OX=10090 GN=C4b PE=1 SV=3	P01029	C4b	193 kDa	188
Fibronectin OS=Mus musculus OX=10090 GN=Fn1 PE=1 SV=4	P11276	Fn1	273 kDa	187
Apolipoprotein E OS=Mus musculus OX=10090 GN=Apoe PE=1 SV=2	P08226	Apoe	36 kDa	177
Talin-1 OS=Mus musculus OX=10090 GN=Tln1 PE=1 SV=2	P26039	Tln1	270 kDa	126
Complement C5 OS=Mus musculus OX=10090 GN=C5 PE=1 SV=2	P06684	C5	189 kDa	113
Sulfhydryl oxidase 1 OS=Mus musculus OX=10090 GN=Qsox1 PE=1 SV=1	Q8BND5	Qsox1	83 kDa	117
Inter alpha-trypsin inhibitor, heavy chain 4 OS=Mus musculus OX=10090 GN=Itih4 PE=1 SV=2	A6X935	Itih4	105 kDa	127
Apolipoprotein A-IV OS=Mus musculus OX=10090 GN=Apoa4 PE=1 SV=3	P06728	Apoa4	45 kDa	142
Cluster of Alpha-1-antitrypsin 1-3 OS=Mus musculus OX=10090 GN=Serpina1c PE=1 SV=2 (Q00896)	Q00896 [4]	Serpina1c	46 kDa	103
Complement factor B OS=Mus musculus OX=10090 GN=Cfb PE=1 SV=2	P04186	Cfb	85 kDa	116
Apolipoprotein C-III OS=Mus musculus OX=10090 GN=Apoc3 PE=1 SV=2	P33622	Apoc3	11 kDa	138
Antithrombin-III OS=Mus musculus OX=10090 GN=Serpinc1 PE=1 SV=1	P32261	Serpinc1	52 kDa	104
Spectrin alpha chain, erythrocytic 1 OS=Mus musculus OX=10090 GN=Spta1 PE=1 SV=3	P08032	Spta1	280 kDa	110
Cluster of Actin, cytoplasmic 2 OS=Mus musculus OX=10090 GN=Actg1 PE=1 SV=1 (P63260)	P63260 [7]	Actg1	42 kDa	101
Fibrinogen alpha chain OS=Mus musculus OX=10090 GN=Fga PE=1 SV=1	E9PV24	Fga	87 kDa	161
Inter-alpha-trypsin inhibitor heavy chain H3 OS=Mus musculus OX=10090 GN=Itih3 PE=1 SV=3	Q61704	Itih3	99 kDa	82
Cluster of Thrombospondin-1 OS=Mus musculus OX=10090 GN=Thbs1 PE=1 SV=1 (P35441)	P35441 [2]	Thbs1	130 kDa	81
Complement component C9 OS=Mus musculus OX=10090 GN=C9 PE=1 SV=2	P06683	C9	62 kDa	91
Fibrinogen beta chain OS=Mus musculus OX=10090 GN=Fgb PE=1 SV=1	Q8K0E8	Fgb	55 kDa	147
Inter-alpha-trypsin inhibitor heavy chain H1 OS=Mus musculus OX=10090 GN=Itih1 PE=1 SV=2	Q61702	Itih1	101 kDa	88
Spectrin beta chain, erythrocytic OS=Mus musculus OX=10090 GN=Sptb PE=1 SV=4	P15508	Sptb	245 kDa	88
| organism=Plasmodium_berghei_ANKA | product=osmiophilic body protein (G377) | location=berg14:2327865-2335685(-) | length=2606 | sequence_SO=chromosome | SO=protein_coding	PBANKA_146300		309 kDa	48
Prothrombin OS=Mus musculus OX=10090 GN=F2 PE=1 SV=1	P19221	F2	70 kDa	76
Fibrinogen gamma chain OS=Mus musculus OX=10090 GN=Fgg PE=1 SV=1	Q8VCM7	Fgg	49 kDa	122
Cluster of Myosin-9 OS=Mus musculus OX=10090 GN=Myh9 PE=1 SV=4 (Q8VDD5)	Q8VDD5 [4]	Myh9	226 kDa	55
Inter-alpha-trypsin inhibitor heavy chain H2 OS=Mus musculus OX=10090 GN=Itih2 PE=1 SV=1	Q61703	Itih2	106 kDa	68
Cluster of Keratin, type II cytoskeletal 5 OS=Mus musculus OX=10090 GN=Krt5 PE=1 SV=1 (Q922U2)	Q922U2 [15]	Krt5	62 kDa	36
Cluster of | organism=Plasmodium_berghei_ANKA | product=heat shock protein, putative (HSP70) | location=berg07:420169-422250(-) | length=693 | sequence_SO=chromosome | SO=protein_coding (PBANKA_071190)	PBANKA_071190 [5]		75 kDa	71
Serine protease inhibitor A3K OS=Mus musculus OX=10090 GN=Serpina3k PE=1 SV=2	P07759	Serpina3k	47 kDa	73
| organism=Plasmodium_berghei_ANKA | product=heat shock protein 90, putative (HSP90) | location=berg08:268690-271847(+) | length=720 | sequence_SO=chromosome | SO=protein_coding	PBANKA_080570		83 kDa	65
Clathrin heavy chain 1 OS=Mus musculus OX=10090 GN=Cltc PE=1 SV=3	Q68FD5	Cltc	192 kDa	49
Immunoglobulin heavy constant mu OS=Mus musculus OX=10090 GN=Ighm PE=1 SV=2	P01872	Ighm	50 kDa	58
Clusterin OS=Mus musculus OX=10090 GN=Clu PE=1 SV=1	Q06890	Clu	52 kDa	66
Plasminogen OS=Mus musculus OX=10090 GN=Plg PE=1 SV=3	P20918	Plg	91 kDa	68
Vinculin OS=Mus musculus OX=10090 GN=Vcl PE=1 SV=4	Q64727	Vcl	117 kDa	53
| organism=Plasmodium_berghei_ANKA | product=glyceraldehyde-3-phosphate dehydrogenase, putative | location=berg13:1022627-1023877(+) | length=337 | sequence_SO=chromosome | SO=protein_coding	PBANKA_132640		37 kDa	49
Cluster of Filamin-A OS=Mus musculus OX=10090 GN=Flna PE=1 SV=5 (Q8BTM8)	Q8BTM8 [2]	Flna	281 kDa	38
Alpha-2-antiplasmin OS=Mus musculus OX=10090 GN=Serpinf2 PE=1 SV=1	Q61247	Serpinf2	55 kDa	43
Elongation factor 2 OS=Mus musculus OX=10090 GN=Eef2 PE=1 SV=2	P58252	Eef2	95 kDa	32
| organism=Plasmodium_berghei_ANKA | product=elongation factor 1 alpha (EF-1alpha) | location=berg11:1236969-1238300(+) | length=443 | sequence_SO=chromosome | SO=protein_coding	PBANKA_113340		49 kDa	50
Vitronectin OS=Mus musculus OX=10090 GN=Vtn PE=1 SV=2	P29788	Vtn	55 kDa	59
Coagulation factor V OS=Mus musculus OX=10090 GN=F5 PE=1 SV=1	O88783	F5	247 kDa	51
Cluster of Ankyrin-1 OS=Mus musculus OX=10090 GN=Ank1 PE=1 SV=2 (Q02357)	Q02357 [3]	Ank1	204 kDa	57
| organism=Plasmodium_berghei_ANKA | product=enolase, putative (ENO) | location=berg12:517612-519171(+) | length=446 | sequence_SO=chromosome | SO=protein_coding	PBANKA_121430		49 kDa	52
Beta-2-glycoprotein 1 OS=Mus musculus OX=10090 GN=Apoh PE=1 SV=1	Q01339	Apoh	39 kDa	55
Insulin-like growth factor-binding protein complex acid labile subunit OS=Mus musculus OX=10090 GN=Igfals PE=1 SV=1	P70389	Igfals	67 kDa	55
Complement component C8 beta chain OS=Mus musculus OX=10090 GN=C8b PE=1 SV=1	Q8BH35	C8b	66 kDa	38
Kininogen-1 OS=Mus musculus OX=10090 GN=Kng1 PE=1 SV=1	O08677	Kng1	73 kDa	44
| organism=Plasmodium_berghei_ANKA | product=tubulin beta chain, putative | location=berg12:255348-257505(-) | length=445 | sequence_SO=chromosome | SO=protein_coding	PBANKA_120690		50 kDa	40
Platelet-activating factor acetylhydrolase OS=Mus musculus OX=10090 GN=Pla2g7 PE=2 SV=2	Q60963	Pla2g7	49 kDa	42
Plasma protease C1 inhibitor OS=Mus musculus OX=10090 GN=Serping1 PE=1 SV=3	P97290	Serping1	56 kDa	46
Cluster of Keratin, type I cytoskeletal 10 OS=Mus musculus OX=10090 GN=Krt10 PE=1 SV=3 (P02535)	P02535 [10]	Krt10	58 kDa	24
Serotransferrin OS=Mus musculus OX=10090 GN=Tf PE=1 SV=1	Q921I1	Tf	77 kDa	48
Complement component C8 alpha chain OS=Mus musculus OX=10090 GN=C8a PE=1 SV=1	Q8K182	C8a	66 kDa	39
Ceruloplasmin OS=Mus musculus OX=10090 GN=Cp PE=1 SV=2	Q61147	Cp	121 kDa	44
Transferrin receptor protein 1 OS=Mus musculus OX=10090 GN=Tfrc PE=1 SV=1	Q62351	Tfrc	86 kDa	27
Carboxypeptidase N subunit 2 OS=Mus musculus OX=10090 GN=Cpn2 PE=1 SV=2	Q9DBB9	Cpn2	60 kDa	45
Band 3 anion transport protein OS=Mus musculus OX=10090 GN=Slc4a1 PE=1 SV=1	P04919	Slc4a1	103 kDa	49
Heat shock protein HSP 90-alpha OS=Mus musculus OX=10090 GN=Hsp90aa1 PE=1 SV=4	P07901	Hsp90aa1	85 kDa	33
Alpha-enolase OS=Mus musculus OX=10090 GN=Eno1 PE=1 SV=3	P17182	Eno1	47 kDa	35
Hemoglobin subunit epsilon-Y2 OS=Mus musculus OX=10090 GN=Hbb-y PE=1 SV=2	P02104	Hbb-y	16 kDa	52
Hemopexin OS=Mus musculus OX=10090 GN=Hpx PE=1 SV=2	Q91X72	Hpx	51 kDa	40
Heat shock protein HSP 90-beta OS=Mus musculus OX=10090 GN=Hsp90ab1 PE=1 SV=3	P11499	Hsp90ab1	83 kDa	29
Cluster of H-2 class I histocompatibility antigen, Q10 alpha chain OS=Mus musculus OX=10090 GN=H2-Q10 PE=1 SV=3 (P01898)	P01898 [10]	H2-Q10	37 kDa	42
Heparin cofactor 2 OS=Mus musculus OX=10090 GN=Serpind1 PE=1 SV=1	P49182	Serpind1	54 kDa	32
Phospholipid transfer protein OS=Mus musculus OX=10090 GN=Pltp PE=1 SV=1	P55065	Pltp	54 kDa	31
Pyruvate kinase PKM OS=Mus musculus OX=10090 GN=Pkm PE=1 SV=4	P52480	Pkm	58 kDa	32
Lipopolysaccharide-binding protein OS=Mus musculus OX=10090 GN=Lbp PE=1 SV=2	Q61805	Lbp	53 kDa	35
Plasma kallikrein OS=Mus musculus OX=10090 GN=Klkb1 PE=1 SV=2	P26262	Klkb1	71 kDa	35
Immunoglobulin kappa constant OS=Mus musculus OX=10090 GN=Igkc PE=1 SV=2	P01837	Igkc	12 kDa	29
Alpha-2-HS-glycoprotein OS=Mus musculus OX=10090 GN=Ahsg PE=1 SV=1	P29699	Ahsg	37 kDa	35
Serine protease inhibitor A3M OS=Mus musculus OX=10090 GN=Serpina3m PE=1 SV=2	Q03734	Serpina3m	47 kDa	38
Phosphatidylinositol-glycan-specific phospholipase D OS=Mus musculus OX=10090 GN=Gpld1 PE=1 SV=1	O70362	Gpld1	93 kDa	44
Fructose-bisphosphate aldolase A OS=Mus musculus OX=10090 GN=Aldoa PE=1 SV=2	P05064	Aldoa	39 kDa	27
Serum amyloid P-component OS=Mus musculus OX=10090 GN=Apcs PE=1 SV=2	P12246	Apcs	26 kDa	28
| organism=Plasmodium_berghei_ANKA | product=merozoite surface protein 1 (MSP1) | location=berg08:1161322-1166697(+) | length=1791 | sequence_SO=chromosome | SO=protein_coding	PBANKA_083100		199 kDa	59
Serum paraoxonase/arylesterase 1 OS=Mus musculus OX=10090 GN=Pon1 PE=1 SV=2	P52430	Pon1	40 kDa	31
Histidine-rich glycoprotein OS=Mus musculus OX=10090 GN=Hrg PE=1 SV=2	Q9ESB3	Hrg	59 kDa	36
Cluster of Tubulin beta-4B chain OS=Mus musculus OX=10090 GN=Tubb4b PE=1 SV=1 (P68372)	P68372 [4]	Tubb4b	50 kDa	26
Cluster of Plastin-2 OS=Mus musculus OX=10090 GN=Lcp1 PE=1 SV=4 (Q61233)	Q61233 [2]	Lcp1	70 kDa	24
Fatty acid synthase OS=Mus musculus OX=10090 GN=Fasn PE=1 SV=2	P19096	Fasn	272 kDa	29
Serum amyloid A-4 protein OS=Mus musculus OX=10090 GN=Saa4 PE=1 SV=2	P31532	Saa4	15 kDa	30
C-1-tetrahydrofolate synthase, cytoplasmic OS=Mus musculus OX=10090 GN=Mthfd1 PE=1 SV=4	Q922D8	Mthfd1	101 kDa	29
Cluster of | organism=Plasmodium_berghei_ANKA | product=karyopherin beta, putative | location=berg12:1467775-1471155(+) | length=1126 | sequence_SO=chromosome | SO=protein_coding (PBANKA_123880)	PBANKA_123880 [2]		128 kDa	30
Protein AMBP OS=Mus musculus OX=10090 GN=Ambp PE=1 SV=2	Q07456	Ambp	39 kDa	28
Prosaposin OS=Mus musculus OX=10090 GN=Psap PE=1 SV=2	Q61207	Psap	61 kDa	25
Cluster of Cullin-associated NEDD8-dissociated protein 1 OS=Mus musculus OX=10090 GN=Cand1 PE=1 SV=2 (Q6ZQ38)	Q6ZQ38 [2]	Cand1	136 kDa	29
Creatine kinase M-type OS=Mus musculus OX=10090 GN=Ckm PE=1 SV=1	P07310	Ckm	43 kDa	21
Fermitin family homolog 3 OS=Mus musculus OX=10090 GN=Fermt3 PE=1 SV=1	Q8K1B8	Fermt3	76 kDa	22
| organism=Plasmodium_berghei_ANKA | product=elongation factor 2, putative | location=berg13:605922-608420(+) | length=832 | sequence_SO=chromosome | SO=protein_coding	PBANKA_131480		93 kDa	22
Serine protease inhibitor A3N OS=Mus musculus OX=10090 GN=Serpina3n PE=1 SV=1	Q91WP6	Serpina3n	47 kDa	28
Cluster of Complement C1r-A subcomponent OS=Mus musculus OX=10090 GN=C1ra PE=1 SV=1 (Q8CG16)	Q8CG16 [2]	C1ra	80 kDa	27
Cluster of | organism=Plasmodium_berghei_ANKA | product=conserved Plasmodium protein, unknown function | location=berg11:1407746-1415866(+) | length=2605 | sequence_SO=chromosome | SO=protein_coding (PBANKA_113780)	PBANKA_113780 [2]		291 kDa	27
Cluster of Lysozyme C-2 OS=Mus musculus OX=10090 GN=Lyz2 PE=1 SV=2 (P08905)	P08905 [2]	Lyz2	17 kDa	24
Cluster of Elongation factor 1-alpha 1 OS=Mus musculus OX=10090 GN=Eef1a1 PE=1 SV=3 (P10126)	P10126 [2]	Eef1a1	50 kDa	21
Carboxypeptidase N catalytic chain OS=Mus musculus OX=10090 GN=Cpn1 PE=1 SV=1	Q9JJN5	Cpn1	52 kDa	22
Cluster of Glyceraldehyde-3-phosphate dehydrogenase OS=Mus musculus OX=10090 GN=Gapdh PE=1 SV=2 (P16858)	P16858 [2]	Gapdh	36 kDa	18
Cluster of | organism=Plasmodium_berghei_ANKA | product=ribonucleoside-diphosphate reductase, large subunit, putative | location=berg06:457843-460598(+) | length=847 | sequence_SO=chromosome | SO=protein_coding (PBANKA_061160)	PBANKA_061160 [2]		97 kDa	17
Fibulin-1 OS=Mus musculus OX=10090 GN=Fbln1 PE=1 SV=2	Q08879	Fbln1	78 kDa	17
Ig gamma-2B chain C region OS=Mus musculus OX=10090 GN=Igh-3 PE=1 SV=3	P01867	Igh-3	44 kDa	18
Complement C2 OS=Mus musculus OX=10090 GN=C2 PE=1 SV=2	P21180	C2	85 kDa	19
Leukemia inhibitory factor receptor OS=Mus musculus OX=10090 GN=Lifr PE=1 SV=1	P42703	Lifr	123 kDa	21
Carbamoyl-phosphate synthase [ammonia], mitochondrial OS=Mus musculus OX=10090 GN=Cps1 PE=1 SV=2	Q8C196	Cps1	165 kDa	47
CD5 antigen-like OS=Mus musculus OX=10090 GN=Cd5l PE=1 SV=3	Q9QWK4	Cd5l	39 kDa	20
Ig gamma-2A chain C region secreted form OS=Mus musculus OX=10090 PE=1 SV=1	P01864		37 kDa	18
| organism=Plasmodium_berghei_ANKA | product=merozoite surface protein 9, putative | location=berg14:1598402-1600258(-) | length=618 | sequence_SO=chromosome | SO=protein_coding	PBANKA_144330		70 kDa	28
Cluster of Adenylyl cyclase-associated protein 1 OS=Mus musculus OX=10090 GN=Cap1 PE=1 SV=4 (P40124)	P40124 [2]	Cap1	52 kDa	19
Cluster of Complement C1s-A subcomponent OS=Mus musculus OX=10090 GN=C1sa PE=2 SV=2 (Q8CG14)	Q8CG14 [2]	C1sa	77 kDa	26
Cluster of Ig gamma-2A chain C region, A allele OS=Mus musculus OX=10090 GN=Ighg PE=1 SV=1 (P01863)	P01863 [3]	Ighg	36 kDa	24
Coagulation factor X OS=Mus musculus OX=10090 GN=F10 PE=1 SV=1	O88947	F10	54 kDa	17
T-complex protein 1 subunit beta OS=Mus musculus OX=10090 GN=Cct2 PE=1 SV=4	P80314	Cct2	57 kDa	18
Cluster of Glycogen phosphorylase, liver form OS=Mus musculus OX=10090 GN=Pygl PE=1 SV=4 (Q9ET01)	Q9ET01 [3]	Pygl	97 kDa	28
Cluster of | organism=Plasmodium_berghei_ANKA | product=TCP-1/cpn60 chaperonin family, putative | location=berg09:642849-644617(+) | length=543 | sequence_SO=chromosome | SO=protein_coding (PBANKA_091620)	PBANKA_091620 [2]		60 kDa	17
Phosphatidylcholine-sterol acyltransferase OS=Mus musculus OX=10090 GN=Lcat PE=1 SV=2	P16301	Lcat	50 kDa	22
Pigment epithelium-derived factor OS=Mus musculus OX=10090 GN=Serpinf1 PE=1 SV=2	P97298	Serpinf1	46 kDa	20
Transthyretin OS=Mus musculus OX=10090 GN=Ttr PE=1 SV=1	P07309	Ttr	16 kDa	16
Vitamin K-dependent protein S OS=Mus musculus OX=10090 GN=Pros1 PE=2 SV=1	Q08761	Pros1	75 kDa	13
Phosphoglucomutase-1 OS=Mus musculus OX=10090 GN=Pgm1 PE=1 SV=4	Q9D0F9	Pgm1	61 kDa	18
Cluster of Tubulin alpha-1B chain OS=Mus musculus OX=10090 GN=Tuba1b PE=1 SV=2 (P05213)	P05213 [2]	Tuba1b	50 kDa	20
Cluster of Eukaryotic initiation factor 4A-I OS=Mus musculus OX=10090 GN=Eif4a1 PE=1 SV=1 (P60843)	P60843 [2]	Eif4a1	46 kDa	13
Cluster of Ras-related protein Rab-10 OS=Mus musculus OX=10090 GN=Rab10 PE=1 SV=1 (P61027)	P61027 [11]	Rab10	23 kDa	13
Cluster of Serine protease inhibitor A3G OS=Mus musculus OX=10090 GN=Serpina3g PE=1 SV=2 (Q5I2A0)	Q5I2A0 [2]	Serpina3g	49 kDa	14
| organism=Plasmodium_berghei_ANKA | product=T-complex protein 1, putative | location=berg03:379327-381079(+) | length=543 | sequence_SO=chromosome | SO=protein_coding	PBANKA_031090		61 kDa	16
Cluster of | organism=Plasmodium_berghei_ANKA | product=endoplasmin, putative (GRP94) | location=berg14:1351801-1354227(-) | length=808 | sequence_SO=chromosome | SO=protein_coding (PBANKA_143730)	PBANKA_143730 [2]		93 kDa	19
Epidermal growth factor receptor OS=Mus musculus OX=10090 GN=Egfr PE=1 SV=1	Q01279	Egfr	135 kDa	23
Zinc-alpha-2-glycoprotein OS=Mus musculus OX=10090 GN=Azgp1 PE=1 SV=2	Q64726	Azgp1	35 kDa	20
Cluster of | organism=Plasmodium_berghei_ANKA | product=t-complex protein 1 gamma subunit, putative | location=berg14:1642507-1644220(+) | length=542 | sequence_SO=chromosome | SO=protein_coding (PBANKA_144410)	PBANKA_144410 [2]		61 kDa	15
Ig gamma-1 chain C region secreted form OS=Mus musculus OX=10090 GN=Ighg1 PE=1 SV=1	P01868 (+1)	Ighg1	36 kDa	12
Glutathione peroxidase 3 OS=Mus musculus OX=10090 GN=Gpx3 PE=1 SV=2	P46412	Gpx3	25 kDa	18
Elongation factor 1-gamma OS=Mus musculus OX=10090 GN=Eef1g PE=1 SV=3	Q9D8N0	Eef1g	50 kDa	13
Exportin-7 OS=Mus musculus OX=10090 GN=Xpo7 PE=1 SV=3	Q9EPK7	Xpo7	124 kDa	10
Beta-enolase OS=Mus musculus OX=10090 GN=Eno3 PE=1 SV=3	P21550	Eno3	47 kDa	10
Importin subunit beta-1 OS=Mus musculus OX=10090 GN=Kpnb1 PE=1 SV=2	P70168	Kpnb1	97 kDa	13
Cluster of Serine/threonine-protein phosphatase 2A 65 kDa regulatory subunit A alpha isoform OS=Mus musculus OX=10090 GN=Ppp2r1a PE=1 SV=3 (Q76MZ3)	Q76MZ3 [2]	Ppp2r1a	65 kDa	17
E2 ubiquitin-conjugating enzyme UBE2O OS=Mus musculus OX=10090 GN=Ube2o PE=1 SV=3	sp|Q6ZPJ3|UBE2O_MOUSE	Ube2o	141 kDa	13
Cluster of | organism=Plasmodium_berghei_ANKA | product=alpha tubulin 2 | location=berg05:852804-854485(+) | length=450 | sequence_SO=chromosome | SO=protein_coding (PBANKA_052270)	PBANKA_052270 [3]		50 kDa	18
Endoplasmin OS=Mus musculus OX=10090 GN=Hsp90b1 PE=1 SV=2	P08113	Hsp90b1	92 kDa	13
C4b-binding protein OS=Mus musculus OX=10090 GN=C4bpa PE=1 SV=3	P08607	C4bpa	52 kDa	19
Apolipoprotein A-II OS=Mus musculus OX=10090 GN=Apoa2 PE=1 SV=2	P09813	Apoa2	11 kDa	21
Carboxylesterase 1C OS=Mus musculus OX=10090 GN=Ces1c PE=1 SV=4	P23953	Ces1c	61 kDa	15
Erythrocyte membrane protein band 4.2 OS=Mus musculus OX=10090 GN=Epb42 PE=1 SV=3	P49222	Epb42	77 kDa	11
T-complex protein 1 subunit delta OS=Mus musculus OX=10090 GN=Cct4 PE=1 SV=3	P80315	Cct4	58 kDa	14
| organism=Plasmodium_berghei_ANKA | product=high molecular weight rhoptry protein 2, putative (RhopH2) | location=berg08:1134874-1139786(+) | length=1354 | sequence_SO=chromosome | SO=protein_coding	PBANKA_083020		160 kDa	21
E3 ubiquitin-protein ligase UBR4 OS=Mus musculus OX=10090 GN=Ubr4 PE=1 SV=1	A2AN08	Ubr4	572 kDa	3
| organism=Plasmodium_berghei_ANKA | product=calcium-dependent protein kinase 4 (CDPK4) | location=berg06:580269-582030(+) | length=528 | sequence_SO=chromosome | SO=protein_coding	PBANKA_061520		61 kDa	11
| organism=Plasmodium_berghei_ANKA | product=hexokinase, putative | location=berg11:833517-835001(+) | length=494 | sequence_SO=chromosome | SO=protein_coding	PBANKA_112290		55 kDa	16
Argininosuccinate lyase OS=Mus musculus OX=10090 GN=Asl PE=1 SV=1	Q91YI0	Asl	52 kDa	20
Cluster of Ig kappa chain V-V region HP R16.7 OS=Mus musculus OX=10090 PE=1 SV=1 (P01644)	P01644 [10]		12 kDa	15
Ubiquitin-like modifier-activating enzyme 1 OS=Mus musculus OX=10090 GN=Uba1 PE=1 SV=1	Q02053	Uba1	118 kDa	17
von Willebrand factor OS=Mus musculus OX=10090 GN=Vwf PE=1 SV=2	Q8CIZ8	Vwf	309 kDa	21
Serum amyloid A-1 protein OS=Mus musculus OX=10090 GN=Saa1 PE=1 SV=2	P05366	Saa1	14 kDa	20
Complement C1q subcomponent subunit A OS=Mus musculus OX=10090 GN=C1qa PE=1 SV=2	P98086	C1qa	26 kDa	17
| organism=Plasmodium_berghei_ANKA | product=T-complex protein beta subunit, putative | location=berg04:200299-202076(-) | length=533 | sequence_SO=chromosome | SO=protein_coding	PBANKA_040520		59 kDa	13
Transitional endoplasmic reticulum ATPase OS=Mus musculus OX=10090 GN=Vcp PE=1 SV=4	Q01853	Vcp	89 kDa	16
Aspartate--tRNA ligase, cytoplasmic OS=Mus musculus OX=10090 GN=Dars PE=1 SV=2	Q922B2	Dars	57 kDa	12
Cluster of EH domain-containing protein 1 OS=Mus musculus OX=10090 GN=Ehd1 PE=1 SV=1 (Q9WVK4)	Q9WVK4 [2]	Ehd1	61 kDa	12
Cluster of Kallikrein 1-related peptidase b9 OS=Mus musculus OX=10090 GN=Klk1b9 PE=2 SV=1 (P15949)	P15949 [3]	Klk1b9	29 kDa	13
Tubulin beta-1 chain OS=Mus musculus OX=10090 GN=Tubb1 PE=1 SV=1	A2AQ07	Tubb1	50 kDa	20
Ig gamma-3 chain C region OS=Mus musculus OX=10090 PE=1 SV=2	P03987		44 kDa	14
Vitamin D-binding protein OS=Mus musculus OX=10090 GN=Gc PE=1 SV=2	P21614	Gc	54 kDa	19
Proteasome activator complex subunit 1 OS=Mus musculus OX=10090 GN=Psme1 PE=1 SV=2	P97371	Psme1	29 kDa	14
Phosphoglycerate kinase 1 OS=Mus musculus OX=10090 GN=Pgk1 PE=1 SV=4	P09411	Pgk1	45 kDa	12
Lumican OS=Mus musculus OX=10090 GN=Lum PE=1 SV=2	P51885	Lum	38 kDa	13
| organism=Plasmodium_berghei_ANKA | product=TCP-1/cpn60 chaperonin, putative | location=berg11:1259022-1261413(+) | length=529 | sequence_SO=chromosome | SO=protein_coding	PBANKA_113410		58 kDa	11
Importin-5 OS=Mus musculus OX=10090 GN=Ipo5 PE=1 SV=3	Q8BKC5	Ipo5	124 kDa	13
Bifunctional glutamate/proline--tRNA ligase OS=Mus musculus OX=10090 GN=Eprs PE=1 SV=4	Q8CGC7	Eprs	170 kDa	6
Cluster of Polyubiquitin-B OS=Mus musculus OX=10090 GN=Ubb PE=2 SV=1 (P0CG49)	P0CG49 [7]	Ubb	34 kDa	13
Proteasome activator complex subunit 2 OS=Mus musculus OX=10090 GN=Psme2 PE=1 SV=4	P97372	Psme2	27 kDa	12
| organism=Plasmodium_berghei_ANKA | product=heat shock protein 110, putative (HSP110c) | location=berg12:714324-716834(+) | length=836 | sequence_SO=chromosome | SO=protein_coding	PBANKA_121930		95 kDa	11
Periostin OS=Mus musculus OX=10090 GN=Postn PE=1 SV=2	Q62009	Postn	93 kDa	13
Cluster of Retinal dehydrogenase 1 OS=Mus musculus OX=10090 GN=Aldh1a1 PE=1 SV=5 (P24549)	P24549 [2]	Aldh1a1	54 kDa	15
Cluster of Protein 4.1 OS=Mus musculus OX=10090 GN=Epb41 PE=1 SV=2 (P48193)	P48193 [3]	Epb41	96 kDa	13
AP-1 complex subunit beta-1 OS=Mus musculus OX=10090 GN=Ap1b1 PE=1 SV=2	O35643	Ap1b1	104 kDa	4
T-complex protein 1 subunit epsilon OS=Mus musculus OX=10090 GN=Cct5 PE=1 SV=1	P80316	Cct5	60 kDa	7
| organism=Plasmodium_berghei_ANKA | product=oxidoreductase, putative | location=berg13:1571360-1572839(-) | length=334 | sequence_SO=chromosome | SO=protein_coding	PBANKA_134040		37 kDa	8
| organism=Plasmodium_berghei_ANKA | product=elongation factor 1-gamma, putative | location=berg13:1972561-1974023(+) | length=403 | sequence_SO=chromosome | SO=protein_coding	PBANKA_135200		47 kDa	13
Complement factor I OS=Mus musculus OX=10090 GN=Cfi PE=1 SV=3	Q61129	Cfi	67 kDa	13
Cluster of Renin-2 OS=Mus musculus OX=10090 GN=Ren2 PE=1 SV=1 (P00796)	P00796 [2]	Ren2	44 kDa	13
Cluster of Heat shock 70 kDa protein 4 OS=Mus musculus OX=10090 GN=Hspa4 PE=1 SV=1 (Q61316)	Q61316 [3]	Hspa4	94 kDa	7
Multimerin-1 OS=Mus musculus OX=10090 GN=Mmrn1 PE=1 SV=2	B2RPV6	Mmrn1	136 kDa	11
Kallikrein 1-related peptidase b16 OS=Mus musculus OX=10090 GN=Klk1b16 PE=1 SV=2	P04071	Klk1b16	29 kDa	13
Complement C1q subcomponent subunit B OS=Mus musculus OX=10090 GN=C1qb PE=1 SV=2	P14106	C1qb	27 kDa	10
T-complex protein 1 subunit theta OS=Mus musculus OX=10090 GN=Cct8 PE=1 SV=3	P42932	Cct8	60 kDa	8
T-complex protein 1 subunit eta OS=Mus musculus OX=10090 GN=Cct7 PE=1 SV=1	P80313	Cct7	60 kDa	11
EGF-containing fibulin-like extracellular matrix protein 1 OS=Mus musculus OX=10090 GN=Efemp1 PE=1 SV=1	Q8BPB5	Efemp1	55 kDa	9
Protein Z-dependent protease inhibitor OS=Mus musculus OX=10090 GN=Serpina10 PE=1 SV=1	Q8R121	Serpina10	52 kDa	13
Carboxypeptidase B2 OS=Mus musculus OX=10090 GN=Cpb2 PE=1 SV=1	Q9JHH6	Cpb2	49 kDa	10
Cluster of 26S proteasome regulatory subunit 4 OS=Mus musculus OX=10090 GN=Psmc1 PE=1 SV=1 (P62192)	P62192 [3]	Psmc1	49 kDa	10
Cluster of AP-2 complex subunit alpha-2 OS=Mus musculus OX=10090 GN=Ap2a2 PE=1 SV=2 (P17427)	P17427 [2]	Ap2a2	104 kDa	4
Metalloproteinase inhibitor 3 OS=Mus musculus OX=10090 GN=Timp3 PE=1 SV=1	P39876	Timp3	24 kDa	11
| organism=Plasmodium_berghei_ANKA | product=phosphoglycerate mutase, putative (PGM1) | location=berg09:1071844-1072903(-) | length=250 | sequence_SO=chromosome | SO=protein_coding	PBANKA_092810		29 kDa	11
| organism=Plasmodium_berghei_ANKA | product=von willebrand factor a-domain-related protein (WARP) | location=berg12:1100216-1101127(+) | length=303 | sequence_SO=chromosome | SO=protein_coding	PBANKA_122890		34 kDa	6
T-complex protein 1 subunit alpha OS=Mus musculus OX=10090 GN=Tcp1 PE=1 SV=3	P11983	Tcp1	60 kDa	8
Adenosylhomocysteinase OS=Mus musculus OX=10090 GN=Ahcy PE=1 SV=3	P50247	Ahcy	48 kDa	13
Mannan-binding lectin serine protease 2 OS=Mus musculus OX=10090 GN=Masp2 PE=1 SV=1	Q91WP0	Masp2	76 kDa	14
Cluster of Dynamin-2 OS=Mus musculus OX=10090 GN=Dnm2 PE=1 SV=2 (P39054)	P39054 [3]	Dnm2	98 kDa	9
Cluster of | organism=Plasmodium_berghei_ANKA | product=pyruvate kinase, putative | location=berg11:921009-923265(+) | length=511 | sequence_SO=chromosome | SO=protein_coding (PBANKA_112560)	PBANKA_112560 [2]		56 kDa	11
Apolipoprotein C-I OS=Mus musculus OX=10090 GN=Apoc1 PE=1 SV=1	P34928	Apoc1	10 kDa	9
| organism=Plasmodium_berghei_ANKA | product=eukaryotic initiation factor 4a, putative (eIF4A) | location=berg13:1288733-1290314(+) | length=398 | sequence_SO=chromosome | SO=protein_coding	PBANKA_133190		45 kDa	13
Tripeptidyl-peptidase 2 OS=Mus musculus OX=10090 GN=Tpp2 PE=1 SV=3	Q64514	Tpp2	140 kDa	12
Alanine--tRNA ligase, cytoplasmic OS=Mus musculus OX=10090 GN=Aars PE=1 SV=1	Q8BGQ7	Aars	107 kDa	6
Complement component C8 gamma chain OS=Mus musculus OX=10090 GN=C8g PE=1 SV=1	Q8VCG4	C8g	23 kDa	13
Endoplasmic reticulum chaperone BiP OS=Mus musculus OX=10090 GN=Hspa5 PE=1 SV=3	P20029	Hspa5	72 kDa	9
Coagulation factor VII OS=Mus musculus OX=10090 GN=F7 PE=1 SV=1	P70375	F7	50 kDa	9
| organism=Plasmodium_berghei_ANKA | product=RhopH3, putative | location=berg04:585978-589539(+) | length=908 | sequence_SO=chromosome | SO=protein_coding	PBANKA_041600		105 kDa	12
| organism=Plasmodium_berghei_ANKA | product=intra-erythrocytic P. berghei-induced structures protein 1 (IBIS1) | location=berg13:2483353-2484550(+) | length=327 | sequence_SO=chromosome | SO=protein_coding	PBANKA_136550		37 kDa	7
Rho GDP-dissociation inhibitor 1 OS=Mus musculus OX=10090 GN=Arhgdia PE=1 SV=3	Q99PT1	Arhgdia	23 kDa	8
Valine--tRNA ligase OS=Mus musculus OX=10090 GN=Vars PE=1 SV=1	Q9Z1Q9	Vars	140 kDa	8
Cluster of Ras GTPase-activating-like protein IQGAP1 OS=Mus musculus OX=10090 GN=Iqgap1 PE=1 SV=2 (Q9JKF1)	Q9JKF1 [2]	Iqgap1	189 kDa	1
Calpain-1 catalytic subunit OS=Mus musculus OX=10090 GN=Capn1 PE=1 SV=1	O35350	Capn1	82 kDa	10
Serum amyloid A-2 protein OS=Mus musculus OX=10090 GN=Saa2 PE=1 SV=1	P05367	Saa2	14 kDa	14
40S ribosomal protein SA OS=Mus musculus OX=10090 GN=Rpsa PE=1 SV=4	P14206	Rpsa	33 kDa	7
| organism=Plasmodium_berghei_ANKA | product=14-3-3 protein, putative (14-3-3I) | location=berg07:446001-447492(-) | length=262 | sequence_SO=chromosome | SO=protein_coding	PBANKA_071260		30 kDa	13
26S proteasome non-ATPase regulatory subunit 11 OS=Mus musculus OX=10090 GN=Psmd11 PE=1 SV=3	Q8BG32	Psmd11	47 kDa	9
AP-2 complex subunit beta OS=Mus musculus OX=10090 GN=Ap2b1 PE=1 SV=1	Q9DBG3	Ap2b1	105 kDa	4
Ubiquitin carboxyl-terminal hydrolase 14 OS=Mus musculus OX=10090 GN=Usp14 PE=1 SV=3	Q9JMA1	Usp14	56 kDa	9
Apolipoprotein M OS=Mus musculus OX=10090 GN=Apom PE=1 SV=1	Q9Z1R3	Apom	21 kDa	10
Kallikrein 1-related peptidase b3 OS=Mus musculus OX=10090 GN=Klk1b3 PE=1 SV=1	P00756	Klk1b3	29 kDa	7
Cluster of 26S proteasome regulatory subunit 8 OS=Mus musculus OX=10090 GN=Psmc5 PE=1 SV=1 (P62196)	P62196 [2]	Psmc5	46 kDa	8
Cluster of | organism=Plasmodium_berghei_ANKA | product=lysine--tRNA ligase, putative | location=berg13:2388411-2390489(-) | length=578 | sequence_SO=chromosome | SO=protein_coding (PBANKA_136290)	PBANKA_136290 [2]		67 kDa	6
26S proteasome non-ATPase regulatory subunit 3 OS=Mus musculus OX=10090 GN=Psmd3 PE=1 SV=3	P14685	Psmd3	61 kDa	7
Eukaryotic translation initiation factor 3 subunit A OS=Mus musculus OX=10090 GN=Eif3a PE=1 SV=5	P23116	Eif3a	162 kDa	0
40S ribosomal protein S2 OS=Mus musculus OX=10090 GN=Rps2 PE=1 SV=3	P25444	Rps2	31 kDa	5
T-complex protein 1 subunit gamma OS=Mus musculus OX=10090 GN=Cct3 PE=1 SV=1	P80318	Cct3	61 kDa	6
Proteoglycan 4 OS=Mus musculus OX=10090 GN=Prg4 PE=1 SV=2	Q9JM99	Prg4	116 kDa	7
Guanine deaminase OS=Mus musculus OX=10090 GN=Gda PE=1 SV=1	Q9R111	Gda	51 kDa	14
| organism=Plasmodium_berghei_ANKA | product=T-complex protein 1 epsilon subunit, putative | location=berg12:676881-678488(-) | length=535 | sequence_SO=chromosome | SO=protein_coding	PBANKA_121820		59 kDa	6
| organism=Plasmodium_berghei_ANKA | product=40S ribosomal protein S2, putative | location=berg13:471616-473013(+) | length=271 | sequence_SO=chromosome | SO=protein_coding	PBANKA_131080		30 kDa	6
Chitinase-3-like protein 1 OS=Mus musculus OX=10090 GN=Chi3l1 PE=1 SV=3	Q61362	Chi3l1	44 kDa	8
6-phosphogluconate dehydrogenase, decarboxylating OS=Mus musculus OX=10090 GN=Pgd PE=1 SV=3	Q9DCD0	Pgd	53 kDa	9
Cluster of | organism=Plasmodium_berghei_ANKA | product=dynamin-like protein, putative | location=berg09:160512-163406(+) | length=814 | sequence_SO=chromosome | SO=protein_coding (PBANKA_090360)	PBANKA_090360 [2]		94 kDa	8
Cluster of | organism=Plasmodium_berghei_ANKA | product=conserved Plasmodium protein, unknown function | location=berg09:1570576-1571972(-) | length=420 | sequence_SO=chromosome | SO=protein_coding (PBANKA_094250)	PBANKA_094250 [2]		49 kDa	6
Cluster of | organism=Plasmodium_berghei_ANKA | product=DNA replication licensing factor MCM7, putative (MCM7) | location=berg08:160365-162848(-) | length=827 | sequence_SO=chromosome | SO=protein_coding (PBANKA_080310)	PBANKA_080310 [2]		95 kDa	4
Mannosyl-oligosaccharide 1,2-alpha-mannosidase IA OS=Mus musculus OX=10090 GN=Man1a1 PE=1 SV=1	P45700	Man1a1	73 kDa	5
V-type proton ATPase catalytic subunit A OS=Mus musculus OX=10090 GN=Atp6v1a PE=1 SV=2	P50516	Atp6v1a	68 kDa	6
| organism=Plasmodium_berghei_ANKA | product=heat shock protein 70, putative | location=berg08:745208-747477(+) | length=651 | sequence_SO=chromosome | SO=protein_coding	PBANKA_081890		72 kDa	10
| organism=Plasmodium_berghei_ANKA | product=secreted ookinete adhesive protein (SOAP) | location=berg10:1486414-1486914(-) | length=166 | sequence_SO=chromosome | SO=protein_coding	PBANKA_103780		18 kDa	3
| organism=Plasmodium_berghei_ANKA | product=secreted ookinete protein, putative (PSOP12) | location=berg11:499342-501641(+) | length=721 | sequence_SO=chromosome | SO=protein_coding	PBANKA_111340		85 kDa	3
Glia-derived nexin OS=Mus musculus OX=10090 GN=Serpine2 PE=1 SV=2	Q07235	Serpine2	44 kDa	9
Apolipoprotein A-V OS=Mus musculus OX=10090 GN=Apoa5 PE=1 SV=1	Q8C7G5	Apoa5	41 kDa	11
Programmed cell death 6-interacting protein OS=Mus musculus OX=10090 GN=Pdcd6ip PE=1 SV=3	Q9WU78	Pdcd6ip	96 kDa	7
Cluster of | organism=Plasmodium_falciparum_3D7 | product=dynein heavy chain, putative | location=Pf3D7_09_v3:251353-269709(-) | length=6118 | sequence_SO=chromosome | SO=protein_coding (PF3D7_0905300)	PF3D7_0905300 [2]		721 kDa	1
Cluster of 14-3-3 protein zeta/delta OS=Mus musculus OX=10090 GN=Ywhaz PE=1 SV=1 (P63101)	P63101 [4]	Ywhaz	28 kDa	9
Ficolin-1 OS=Mus musculus OX=10090 GN=Fcn1 PE=1 SV=1	O70165	Fcn1	36 kDa	11
Porphobilinogen deaminase OS=Mus musculus OX=10090 GN=Hmbs PE=1 SV=2	P22907	Hmbs	39 kDa	5
Peroxiredoxin-2 OS=Mus musculus OX=10090 GN=Prdx2 PE=1 SV=3	Q61171	Prdx2	22 kDa	11
Proteasome adapter and scaffold protein ECM29 OS=Mus musculus OX=10090 GN=Ecpas PE=1 SV=3	Q6PDI5	Ecpas	204 kDa	7
Isoleucine--tRNA ligase, cytoplasmic OS=Mus musculus OX=10090 GN=Iars PE=1 SV=2	Q8BU30	Iars	144 kDa	1
Fructose-bisphosphate aldolase B OS=Mus musculus OX=10090 GN=Aldob PE=1 SV=3	Q91Y97	Aldob	40 kDa	11
Actin-related protein 2 OS=Mus musculus OX=10090 GN=Actr2 PE=1 SV=1	P61161	Actr2	45 kDa	4
| organism=Plasmodium_berghei_ANKA | product=chaperone, putative | location=berg01:269623-271338(+) | length=543 | sequence_SO=chromosome | SO=protein_coding	PBANKA_010730		61 kDa	7
| organism=Plasmodium_berghei_ANKA | product=Hsp70/Hsp90 organizing protein, putative (HOP) | location=berg10:447225-448904(-) | length=559 | sequence_SO=chromosome | SO=protein_coding	PBANKA_101050		66 kDa	4
Haptoglobin OS=Mus musculus OX=10090 GN=Hp PE=1 SV=1	Q61646	Hp	39 kDa	7
Spectrin beta chain, non-erythrocytic 1 OS=Mus musculus OX=10090 GN=Sptbn1 PE=1 SV=2	Q62261	Sptbn1	274 kDa	5
Pyrethroid hydrolase Ces2e OS=Mus musculus OX=10090 GN=Ces2e PE=1 SV=1	Q8BK48	Ces2e	62 kDa	9
Acidic mammalian chitinase OS=Mus musculus OX=10090 GN=Chia PE=1 SV=2	Q91XA9	Chia	52 kDa	14
Cluster of | organism=Plasmodium_berghei_ANKA | product=conserved Plasmodium protein, unknown function | location=berg06:167284-169217(-) | length=330 | sequence_SO=chromosome | SO=protein_coding (PBANKA_060430)	PBANKA_060430 [2]		39 kDa	4
Alcohol dehydrogenase 1 OS=Mus musculus OX=10090 GN=Adh1 PE=1 SV=2	P00329	Adh1	40 kDa	11
60S acidic ribosomal protein P0 OS=Mus musculus OX=10090 GN=Rplp0 PE=1 SV=3	P14869	Rplp0	34 kDa	6
Bisphosphoglycerate mutase OS=Mus musculus OX=10090 GN=Bpgm PE=1 SV=2	P15327	Bpgm	30 kDa	8
Leukotriene A-4 hydrolase OS=Mus musculus OX=10090 GN=Lta4h PE=1 SV=4	P24527	Lta4h	69 kDa	3
26S proteasome regulatory subunit 7 OS=Mus musculus OX=10090 GN=Psmc2 PE=1 SV=5	P46471	Psmc2	49 kDa	8
Mannan-binding lectin serine protease 1 OS=Mus musculus OX=10090 GN=Masp1 PE=1 SV=2	P98064	Masp1	80 kDa	9
| organism=Plasmodium_berghei_ANKA | product=6-phosphogluconate dehydrogenase, decarboxylating, putative | location=berg13:746248-747666(+) | length=472 | sequence_SO=chromosome | SO=protein_coding	PBANKA_131840		53 kDa	6
Cytoplasmic dynein 1 heavy chain 1 OS=Mus musculus OX=10090 GN=Dync1h1 PE=1 SV=2	Q9JHU4	Dync1h1	532 kDa	2
Phenylalanine--tRNA ligase beta subunit OS=Mus musculus OX=10090 GN=Farsb PE=1 SV=2	Q9WUA2	Farsb	66 kDa	5
| organism=Plasmodium_falciparum_3D7 | product=conserved Plasmodium protein, unknown function | location=Pf3D7_13_v3:184845-212660(-) | length=9271 | sequence_SO=chromosome | SO=protein_coding	PF3D7_1303800		1112 kDa	1
Cluster of | organism=Plasmodium_berghei_ANKA | product=dynein heavy chain, putative | location=berg09:955954-971682(-) | length=5176 | sequence_SO=chromosome | SO=protein_coding (PBANKA_092540)	PBANKA_092540 [2]		605 kDa	2
Cluster of | organism=Plasmodium_berghei_ANKA | product=26S proteasome subunit, putative | location=berg13:1197211-1201087(+) | length=1219 | sequence_SO=chromosome | SO=protein_coding (PBANKA_132970)	PBANKA_132970 [2]		138 kDa	5
Platelet glycoprotein V OS=Mus musculus OX=10090 GN=Gp5 PE=1 SV=1	O08742	Gp5	63 kDa	10
Properdin OS=Mus musculus OX=10090 GN=Cfp PE=2 SV=2	P11680	Cfp	50 kDa	6
Vitamin K-dependent protein C OS=Mus musculus OX=10090 GN=Proc PE=1 SV=2	P33587	Proc	52 kDa	8
Peroxiredoxin-1 OS=Mus musculus OX=10090 GN=Prdx1 PE=1 SV=1	P35700	Prdx1	22 kDa	8
Uroporphyrinogen decarboxylase OS=Mus musculus OX=10090 GN=Urod PE=1 SV=2	P70697	Urod	41 kDa	4
40S ribosomal protein S3a OS=Mus musculus OX=10090 GN=Rps3a PE=1 SV=3	P97351	Rps3a	30 kDa	4
| organism=Plasmodium_berghei_ANKA | product=replication protein A1, small fragment | location=berg04:632944-634689(-) | length=486 | sequence_SO=chromosome | SO=protein_coding	PBANKA_041660		57 kDa	5
| organism=Plasmodium_berghei_ANKA | product=tryptophan/threonine-rich antigen, putative | location=berg05:898721-899905(-) | length=354 | sequence_SO=chromosome | SO=protein_coding	PBANKA_052430		44 kDa	8
| organism=Plasmodium_berghei_ANKA | product=Plasmodium exported protein, unknown function | location=berg12:1103822-1107252(+) | length=1095 | sequence_SO=chromosome | SO=protein_coding	PBANKA_122900		126 kDa	10
| organism=Plasmodium_berghei_ANKA | product=40S ribosomal protein S3, putative | location=berg13:1175944-1177217(+) | length=222 | sequence_SO=chromosome | SO=protein_coding	PBANKA_132930		25 kDa	11
| organism=Plasmodium_berghei_ANKA | product=cytoadherence linked asexual protein, putative | location=berg14:22437-27033(-) | length=1296 | sequence_SO=chromosome | SO=protein_coding	PBANKA_140060		152 kDa	8
Complement C1q subcomponent subunit C OS=Mus musculus OX=10090 GN=C1qc PE=1 SV=2	Q02105	C1qc	26 kDa	7
GTPase-activating protein and VPS9 domain-containing protein 1 OS=Mus musculus OX=10090 GN=Gapvd1 PE=1 SV=2	Q6PAR5	Gapvd1	162 kDa	9
Nicotinamide phosphoribosyltransferase OS=Mus musculus OX=10090 GN=Nampt PE=1 SV=1	Q99KQ4	Nampt	55 kDa	8
Actin-related protein 2/3 complex subunit 2 OS=Mus musculus OX=10090 GN=Arpc2 PE=1 SV=3	Q9CVB6	Arpc2	34 kDa	4
Cluster of Eukaryotic translation initiation factor 2 subunit 3, X-linked OS=Mus musculus OX=10090 GN=Eif2s3x PE=1 SV=2 (Q9Z0N1)	Q9Z0N1 [2]	Eif2s3x	51 kDa	4
Peroxiredoxin-6 OS=Mus musculus OX=10090 GN=Prdx6 PE=1 SV=3	O08709	Prdx6	25 kDa	7
Transcobalamin-2 OS=Mus musculus OX=10090 GN=Tcn2 PE=1 SV=1	O88968	Tcn2	48 kDa	4
Angiotensinogen OS=Mus musculus OX=10090 GN=Agt PE=1 SV=1	P11859	Agt	52 kDa	7
Kallikrein 1-related peptidase b11 OS=Mus musculus OX=10090 GN=Klk1b11 PE=2 SV=1	P15946	Klk1b11	29 kDa	8
Apolipoprotein D OS=Mus musculus OX=10090 GN=Apod PE=1 SV=1	P51910	Apod	22 kDa	7
| organism=Plasmodium_berghei_ANKA | product=GTP-binding nuclear protein, putative | location=berg09:1147494-1148292(+) | length=214 | sequence_SO=chromosome | SO=protein_coding	PBANKA_093030 (+1)		25 kDa	4
| organism=Plasmodium_berghei_ANKA | product=thioredoxin peroxidase 1 (TPx1) | location=berg13:147230-147817(+) | length=195 | sequence_SO=chromosome | SO=protein_coding	PBANKA_130280		22 kDa	8
| organism=Plasmodium_berghei_ANKA | product=fructose-bisphosphate aldolase 2 (ALDO2) | location=berg13:394044-395494(-) | length=369 | sequence_SO=chromosome | SO=protein_coding	PBANKA_130860		40 kDa	5
| organism=Plasmodium_berghei_ANKA | product=gamete egress and sporozoite traversal protein (GEST) | location=berg13:528256-529360(-) | length=249 | sequence_SO=chromosome | SO=protein_coding	PBANKA_131270		29 kDa	3
| organism=Plasmodium_berghei_ANKA | product=vacuolar ATP synthase subunit a, putative | location=berg14:387557-389392(+) | length=611 | sequence_SO=chromosome | SO=protein_coding	PBANKA_141040		68 kDa	6
| organism=Plasmodium_berghei_ANKA | product=serine hydroxymethyltransferase, putative (SHMT) | location=berg14:1891811-1893448(+) | length=442 | sequence_SO=chromosome | SO=protein_coding	PBANKA_145020		50 kDa	4
26S proteasome non-ATPase regulatory subunit 6 OS=Mus musculus OX=10090 GN=Psmd6 PE=1 SV=1	Q99JI4	Psmd6	46 kDa	7
Inhibitor of carbonic anhydrase OS=Mus musculus OX=10090 GN=Ica PE=1 SV=1	Q9DBD0	Ica	77 kDa	5
Multifunctional protein ADE2 OS=Mus musculus OX=10090 GN=Paics PE=1 SV=4	Q9DCL9	Paics	47 kDa	2
EH domain-containing protein 4 OS=Mus musculus OX=10090 GN=Ehd4 PE=1 SV=1	Q9EQP2	Ehd4	61 kDa	6
Fetuin-B OS=Mus musculus OX=10090 GN=Fetub PE=1 SV=1	Q9QXC1	Fetub	43 kDa	5
Interferon-inducible GTPase 1 OS=Mus musculus OX=10090 GN=Iigp1 PE=1 SV=2	Q9QZ85	Iigp1	48 kDa	9
Cluster of Hexokinase-1 OS=Mus musculus OX=10090 GN=Hk1 PE=1 SV=3 (P17710)	P17710 [2]	Hk1	108 kDa	8
Cluster of ADP-ribosylation factor 3 OS=Mus musculus OX=10090 GN=Arf3 PE=2 SV=2 (P61205)	P61205 [4]	Arf3	21 kDa	4
WD repeat-containing protein 1 OS=Mus musculus OX=10090 GN=Wdr1 PE=1 SV=3	O88342	Wdr1	66 kDa	6
60S ribosomal protein L7a OS=Mus musculus OX=10090 GN=Rpl7a PE=1 SV=2	P12970	Rpl7a	30 kDa	6
Kallikrein 1-related peptidase b22 OS=Mus musculus OX=10090 GN=Klk1b22 PE=1 SV=1	P15948	Klk1b22	28 kDa	4
Serine--tRNA ligase, cytoplasmic OS=Mus musculus OX=10090 GN=Sars PE=1 SV=3	P26638	Sars	58 kDa	3
Hepatic triacylglycerol lipase OS=Mus musculus OX=10090 GN=Lipc PE=2 SV=2	P27656	Lipc	57 kDa	3
T-complex protein 1 subunit zeta OS=Mus musculus OX=10090 GN=Cct6a PE=1 SV=3	P80317	Cct6a	58 kDa	6
| organism=Plasmodium_berghei_ANKA | product=ubiquitin-activating enzyme e1, putative (UBA1) | location=berg14:1487363-1491016(+) | length=1120 | sequence_SO=chromosome | SO=protein_coding	PBANKA_144070		129 kDa	3
| organism=Plasmodium_berghei_ANKA | product=hydrolase, putative | location=berg14:1503349-1504215(+) | length=288 | sequence_SO=chromosome | SO=protein_coding	PBANKA_144110		33 kDa	6
| organism=Plasmodium_falciparum_3D7 | product=chitinase (CHT1) | location=Pf3D7_12_v3:2125435-2126571(+) | length=378 | sequence_SO=chromosome | SO=protein_coding	PF3D7_1252200		43 kDa	16
Apolipoprotein C-II OS=Mus musculus OX=10090 GN=Apoc2 PE=2 SV=1	Q05020	Apoc2	11 kDa	6
Guanylate-binding protein 4 OS=Mus musculus OX=10090 GN=Gbp4 PE=1 SV=1	Q61107	Gbp4	71 kDa	2
BPI fold-containing family B member 1 OS=Mus musculus OX=10090 GN=Bpifb1 PE=2 SV=4	Q61114	Bpifb1	52 kDa	4
Anthrax toxin receptor 2 OS=Mus musculus OX=10090 GN=Antxr2 PE=1 SV=1	Q6DFX2	Antxr2	53 kDa	3
26S proteasome non-ATPase regulatory subunit 13 OS=Mus musculus OX=10090 GN=Psmd13 PE=1 SV=1	Q9WVJ2	Psmd13	43 kDa	6
Kallikrein 1-related peptidase b27 OS=Mus musculus OX=10090 GN=Klk1b27 PE=1 SV=1	Q9JM71	Klk1b27	29 kDa	3
Cluster of | organism=Plasmodium_berghei_ANKA | product=tudor staphylococcal nuclease, putative (TSN) | location=berg09:492359-495649(-) | length=1013 | sequence_SO=chromosome | SO=protein_coding (PBANKA_091230)	PBANKA_091230 [2]		118 kDa	7
Cluster of Actin-related protein 3 OS=Mus musculus OX=10090 GN=Actr3 PE=1 SV=3 (Q99JY9)	Q99JY9 [2]	Actr3	47 kDa	3
Kallikrein-1 OS=Mus musculus OX=10090 GN=Klk1 PE=1 SV=3	P15947	Klk1	29 kDa	6
Coagulation factor IX OS=Mus musculus OX=10090 GN=F9 PE=2 SV=3	P16294	F9	53 kDa	1
Peptidyl-prolyl cis-trans isomerase C OS=Mus musculus OX=10090 GN=Ppic PE=1 SV=1	P30412	Ppic	23 kDa	6
Mannose-binding protein A OS=Mus musculus OX=10090 GN=Mbl1 PE=1 SV=1	P39039	Mbl1	25 kDa	4
Vesicle-fusing ATPase OS=Mus musculus OX=10090 GN=Nsf PE=1 SV=2	P46460	Nsf	83 kDa	4
40S ribosomal protein S3 OS=Mus musculus OX=10090 GN=Rps3 PE=1 SV=1	P62908	Rps3	27 kDa	5
| organism=Plasmodium_berghei_ANKA | product=phosphoglycerate kinase, putative (PGK) | location=berg08:902635-903885(+) | length=416 | sequence_SO=chromosome | SO=protein_coding	PBANKA_082340		45 kDa	6
| organism=Plasmodium_berghei_ANKA | product=DNA/RNA-binding protein Alba 4, putative (ALBA4) | location=berg13:2287319-2288555(-) | length=374 | sequence_SO=chromosome | SO=protein_coding	PBANKA_136030		42 kDa	4
| organism=Plasmodium_berghei_ANKA | product=DNA ligase I, putative | location=berg14:119032-121858(-) | length=898 | sequence_SO=chromosome | SO=protein_coding	PBANKA_140260		103 kDa	0
| organism=Plasmodium_berghei_ANKA | product=DNA replication licensing factor MCM4, putative (MCM4) | location=berg14:573167-576001(+) | length=944 | sequence_SO=chromosome | SO=protein_coding	PBANKA_141560		108 kDa	4
26S proteasome non-ATPase regulatory subunit 1 OS=Mus musculus OX=10090 GN=Psmd1 PE=1 SV=1	Q3TXS7	Psmd1	106 kDa	5
Tenascin OS=Mus musculus OX=10090 GN=Tnc PE=1 SV=1	Q80YX1	Tnc	232 kDa	2
Transgelin-2 OS=Mus musculus OX=10090 GN=Tagln2 PE=1 SV=4	Q9WVA4	Tagln2	22 kDa	5
Cluster of | organism=Plasmodium_berghei_ANKA | product=ATP-dependent RNA helicase UAP56, putative (UAP56) | location=berg03:241443-242934(-) | length=466 | sequence_SO=chromosome | SO=protein_coding (PBANKA_030680)	PBANKA_030680 [2]		53 kDa	4
Cluster of | organism=Plasmodium_berghei_ANKA | product=dynein heavy chain, putative | location=berg05:307086-323015(-) | length=5309 | sequence_SO=chromosome | SO=protein_coding (PBANKA_050730)	PBANKA_050730 [2]		624 kDa	1
Cluster of | organism=Plasmodium_berghei_ANKA | product=DNA replication licensing factor MCM2, putative (MCM2) | location=berg10:961008-964115(-) | length=971 | sequence_SO=chromosome | SO=protein_coding (PBANKA_102490)	PBANKA_102490 [2]		111 kDa	4
Cluster of | organism=Plasmodium_berghei_ANKA | product=cell division cycle protein 48 homologue, putative | location=berg11:681153-683726(-) | length=815 | sequence_SO=chromosome | SO=protein_coding (PBANKA_111860)	PBANKA_111860 [2]		91 kDa	6
Cluster of Thrombospondin-4 OS=Mus musculus OX=10090 GN=Thbs4 PE=1 SV=1 (Q9Z1T2)	Q9Z1T2 [2]	Thbs4	106 kDa	3
CAD protein OS=Mus musculus OX=10090 GN=Cad PE=1 SV=1	B2RQC6	Cad	243 kDa	2
E3 ubiquitin-protein ligase RNF213 OS=Mus musculus OX=10090 GN=Rnf213 PE=1 SV=2	E9Q555	Rnf213	585 kDa	0
Desmoplakin OS=Mus musculus OX=10090 GN=Dsp PE=1 SV=1	E9Q557	Dsp	333 kDa	0
BPI fold-containing family A member 2 OS=Mus musculus OX=10090 GN=Bpifa2 PE=1 SV=1	P07743	Bpifa2	25 kDa	9
Proliferation-associated protein 2G4 OS=Mus musculus OX=10090 GN=Pa2g4 PE=1 SV=3	P50580	Pa2g4	44 kDa	3
60S ribosomal protein L10a OS=Mus musculus OX=10090 GN=Rpl10a PE=1 SV=3	P53026	Rpl10a	25 kDa	5
ATP-binding cassette sub-family E member 1 OS=Mus musculus OX=10090 GN=Abce1 PE=1 SV=1	P61222	Abce1	67 kDa	5
40S ribosomal protein S4, X isoform OS=Mus musculus OX=10090 GN=Rps4x PE=1 SV=2	P62702	Rps4x	30 kDa	1
GTP-binding nuclear protein Ran OS=Mus musculus OX=10090 GN=Ran PE=1 SV=3	P62827	Ran	24 kDa	5
55 kDa erythrocyte membrane protein OS=Mus musculus OX=10090 GN=Mpp1 PE=1 SV=1	P70290	Mpp1	52 kDa	3
AP-2 complex subunit mu OS=Mus musculus OX=10090 GN=Ap2m1 PE=1 SV=1	P84091	Ap2m1	50 kDa	5
| organism=Plasmodium_berghei_ANKA | product=chromatin assembly factor 1 protein WD40 domain, putative | location=berg02:134161-135501(+) | length=446 | sequence_SO=chromosome | SO=protein_coding	PBANKA_020300		51 kDa	4
| organism=Plasmodium_berghei_ANKA | product=TCP-1/cpn60 chaperonin, putative | location=berg04:251593-253356(-) | length=539 | sequence_SO=chromosome | SO=protein_coding	PBANKA_040650		60 kDa	7
| organism=Plasmodium_berghei_ANKA | product=60S ribosomal protein, putative | location=berg09:711713-712660(-) | length=315 | sequence_SO=chromosome | SO=protein_coding	PBANKA_091800		35 kDa	6
| organism=Plasmodium_berghei_ANKA | product=LCCL domain-containing protein (CCp3) | location=berg10:1392158-1396072(-) | length=1304 | sequence_SO=chromosome | SO=protein_coding	PBANKA_103520		148 kDa	1
| organism=Plasmodium_berghei_ANKA | product=rhoptry-associated protein 2/3 (RAP2/3) | location=berg11:61847-63013(-) | length=388 | sequence_SO=chromosome | SO=protein_coding	PBANKA_110140		46 kDa	9
| organism=Plasmodium_berghei_ANKA | product=glutamate--tRNA ligase, putative | location=berg13:2357393-2359804(-) | length=803 | sequence_SO=chromosome | SO=protein_coding	PBANKA_136200		94 kDa	3
Staphylococcal nuclease domain-containing protein 1 OS=Mus musculus OX=10090 GN=Snd1 PE=1 SV=1	Q78PY7	Snd1	102 kDa	1
Prenylcysteine oxidase OS=Mus musculus OX=10090 GN=Pcyox1 PE=1 SV=1	Q9CQF9	Pcyox1	56 kDa	5
| organism=Plasmodium_berghei_ANKA | product=conserved rodent malaria protein, unknown function | location=berg11:1695580-1696372(+) | length=179 | sequence_SO=chromosome | SO=protein_coding	PBANKA_114580		20 kDa	7
Protein diaphanous homolog 1 OS=Mus musculus OX=10090 GN=Diaph1 PE=1 SV=1	O08808	Diaph1	139 kDa	4
Ig alpha chain C region OS=Mus musculus OX=10090 PE=1 SV=1	P01878		37 kDa	5
Ig heavy chain V region AC38 205.12 OS=Mus musculus OX=10090 PE=1 SV=1	P06330		13 kDa	5
Triosephosphate isomerase OS=Mus musculus OX=10090 GN=Tpi1 PE=1 SV=4	P17751	Tpi1	32 kDa	7
Catalase OS=Mus musculus OX=10090 GN=Cat PE=1 SV=4	P24270	Cat	60 kDa	5
Mannose-binding protein C OS=Mus musculus OX=10090 GN=Mbl2 PE=1 SV=2	P41317	Mbl2	26 kDa	7
Erythrocyte band 7 integral membrane protein OS=Mus musculus OX=10090 GN=Stom PE=1 SV=3	P54116	Stom	31 kDa	8
Serine/threonine-protein phosphatase 2A activator OS=Mus musculus OX=10090 GN=Ptpa PE=1 SV=1	P58389	Ptpa	37 kDa	5
26S proteasome regulatory subunit 10B OS=Mus musculus OX=10090 GN=Psmc6 PE=1 SV=1	P62334	Psmc6	44 kDa	6
| organism=Plasmodium_berghei_ANKA | product=40S ribosomal protein S19, putative | location=berg05:856646-857606(+) | length=172 | sequence_SO=chromosome | SO=protein_coding	PBANKA_052280		20 kDa	8
ATP synthase subunit alpha, mitochondrial OS=Mus musculus OX=10090 GN=Atp5f1a PE=1 SV=1	Q03265	Atp5f1a	60 kDa	4
Eukaryotic translation initiation factor 2 subunit 1 OS=Mus musculus OX=10090 GN=Eif2s1 PE=1 SV=3	Q6ZWX6	Eif2s1	36 kDa	2
26S proteasome non-ATPase regulatory subunit 2 OS=Mus musculus OX=10090 GN=Psmd2 PE=1 SV=1	Q8VDM4	Psmd2	100 kDa	8
Prolow-density lipoprotein receptor-related protein 1 OS=Mus musculus OX=10090 GN=Lrp1 PE=1 SV=1	Q91ZX7	Lrp1	505 kDa	2
26S proteasome non-ATPase regulatory subunit 12 OS=Mus musculus OX=10090 GN=Psmd12 PE=1 SV=4	Q9D8W5	Psmd12	53 kDa	6
Exportin-2 OS=Mus musculus OX=10090 GN=Cse1l PE=1 SV=1	Q9ERK4	Cse1l	110 kDa	3
Alpha-adducin OS=Mus musculus OX=10090 GN=Add1 PE=1 SV=2	Q9QYC0	Add1	81 kDa	6
Epididymal secretory glutathione peroxidase OS=Mus musculus OX=10090 GN=Gpx5 PE=2 SV=3	P21765	Gpx5	25 kDa	4
| organism=Plasmodium_berghei_ANKA | product=60S ribosomal protein L10a, putative | location=berg13:242495-243635(+) | length=217 | sequence_SO=chromosome | SO=protein_coding	PBANKA_130510		25 kDa	7
Kallikrein 1-related peptidase b21 OS=Mus musculus OX=10090 GN=Klk1b21 PE=2 SV=3	Q61759	Klk1b21	29 kDa	3
Cluster of 26S proteasome regulatory subunit 6B OS=Mus musculus OX=10090 GN=Psmc4 PE=1 SV=2 (P54775)	P54775 [3]	Psmc4	47 kDa	6
Cluster of | organism=Plasmodium_berghei_ANKA | product=histone H3, putative | location=berg01:342642-343052(+) | length=136 | sequence_SO=chromosome | SO=protein_coding (PBANKA_010880)	PBANKA_010880 [6]		15 kDa	6
Platelet glycoprotein Ib alpha chain OS=Mus musculus OX=10090 GN=Gp1ba PE=1 SV=2	O35930	Gp1ba	80 kDa	5
Carbonic anhydrase 3 OS=Mus musculus OX=10090 GN=Ca3 PE=1 SV=3	P16015	Ca3	29 kDa	3
Glutathione S-transferase P 1 OS=Mus musculus OX=10090 GN=Gstp1 PE=1 SV=2	P19157	Gstp1	24 kDa	4
Epidermal growth factor-binding protein type B OS=Mus musculus OX=10090 GN=Egfbp2 PE=1 SV=1	P36368	Egfbp2	29 kDa	6
COP9 signalosome complex subunit 2 OS=Mus musculus OX=10090 GN=Cops2 PE=1 SV=1	P61202	Cops2	52 kDa	4
40S ribosomal protein S18 OS=Mus musculus OX=10090 GN=Rps18 PE=1 SV=3	P62270	Rps18	18 kDa	3
Receptor of activated protein C kinase 1 OS=Mus musculus OX=10090 GN=Rack1 PE=1 SV=3	P68040	Rack1	35 kDa	3
| organism=Plasmodium_berghei_ANKA | product=rhoptry-associated protein 1, putative (RAP1) | location=berg10:1254745-1256559(-) | length=604 | sequence_SO=chromosome | SO=protein_coding	PBANKA_103210		71 kDa	7
| organism=Plasmodium_berghei_ANKA | product=40S ribosomal protein S3A, putative | location=berg12:560276-561558(+) | length=262 | sequence_SO=chromosome | SO=protein_coding	PBANKA_121560		30 kDa	7
E3 ubiquitin-protein ligase RNF123 OS=Mus musculus OX=10090 GN=Rnf123 PE=1 SV=1	Q5XPI3	Rnf123	149 kDa	5
Xaa-Pro aminopeptidase 1 OS=Mus musculus OX=10090 GN=Xpnpep1 PE=1 SV=1	Q6P1B1	Xpnpep1	70 kDa	2
Exportin-1 OS=Mus musculus OX=10090 GN=Xpo1 PE=1 SV=1	Q6P5F9	Xpo1	123 kDa	2
60S ribosomal protein L10 OS=Mus musculus OX=10090 GN=Rpl10 PE=1 SV=3	Q6ZWV3	Rpl10	25 kDa	3
Coagulation factor XII OS=Mus musculus OX=10090 GN=F12 PE=1 SV=2	Q80YC5	F12	66 kDa	6
Activator of 90 kDa heat shock protein ATPase homolog 1 OS=Mus musculus OX=10090 GN=Ahsa1 PE=1 SV=2	Q8BK64	Ahsa1	38 kDa	4
3-ketoacyl-CoA thiolase, mitochondrial OS=Mus musculus OX=10090 GN=Acaa2 PE=1 SV=3	Q8BWT1	Acaa2	42 kDa	9
Biliverdin reductase A OS=Mus musculus OX=10090 GN=Blvra PE=1 SV=1	Q9CY64	Blvra	34 kDa	4
Platelet factor 4 OS=Mus musculus OX=10090 GN=Pf4 PE=1 SV=1	Q9Z126	Pf4	11 kDa	3
Beta-2-microglobulin OS=Mus musculus OX=10090 GN=B2m PE=1 SV=2	P01887	B2m	14 kDa	7
Apolipoprotein C-IV OS=Mus musculus OX=10090 GN=Apoc4 PE=1 SV=1	Q61268	Apoc4	14 kDa	6
Cluster of Ig heavy chain V-III region A4 OS=Mus musculus OX=10090 PE=1 SV=1 (P01796)	P01796 [5]		13 kDa	5
Cluster of | organism=Plasmodium_berghei_ANKA | product=40S ribosomal protein S4, putative | location=berg09:1537194-1538255(+) | length=261 | sequence_SO=chromosome | SO=protein_coding (PBANKA_094150)	PBANKA_094150 [2]		30 kDa	6
Cluster of | organism=Plasmodium_berghei_ANKA | product=histone H2A, putative (H2A) | location=berg11:621544-621945(-) | length=133 | sequence_SO=chromosome | SO=protein_coding (PBANKA_111700)	PBANKA_111700 [14]		14 kDa	7
Cluster of | organism=Plasmodium_berghei_ANKA | product=26S proteasome regulatory subunit 7, putative | location=berg14:373185-374757(-) | length=420 | sequence_SO=chromosome | SO=protein_coding (PBANKA_141000)	PBANKA_141000 [2]		47 kDa	6
Cluster of Eukaryotic peptide chain release factor subunit 1 OS=Mus musculus OX=10090 GN=Etf1 PE=1 SV=4 (Q8BWY3)	Q8BWY3 [2]	Etf1	49 kDa	4
Cluster of Ras-related C3 botulinum toxin substrate 1 OS=Mus musculus OX=10090 GN=Rac1 PE=1 SV=1 (P63001)	P63001 [2]	Rac1	21 kDa	3
Cluster of | organism=Plasmodium_berghei_ANKA | product=DNA replication licensing factor MCM5, putative (MCM5) | location=berg06:410706-413849(+) | length=758 | sequence_SO=chromosome | SO=protein_coding (PBANKA_061020)	PBANKA_061020 [2]		86 kDa	2
Cluster of Alpha-centractin OS=Mus musculus OX=10090 GN=Actr1a PE=1 SV=1 (P61164)	P61164 [2]	Actr1a	43 kDa
26S proteasome regulatory subunit 6A OS=Mus musculus OX=10090 GN=Psmc3 PE=1 SV=2	O88685	Psmc3	50 kDa	5
Isocitrate dehydrogenase [NADP] cytoplasmic OS=Mus musculus OX=10090 GN=Idh1 PE=1 SV=2	O88844	Idh1	47 kDa	5
Myoglobin OS=Mus musculus OX=10090 GN=Mb PE=1 SV=3	P04247	Mb	17 kDa	3
C-reactive protein OS=Mus musculus OX=10090 GN=Crp PE=1 SV=2	P14847	Crp	25 kDa	3
60S ribosomal protein L12 OS=Mus musculus OX=10090 GN=Rpl12 PE=1 SV=2	P35979	Rpl12	18 kDa	2
Pyruvate kinase PKLR OS=Mus musculus OX=10090 GN=Pklr PE=1 SV=1	P53657	Pklr	62 kDa	2
Actin-related protein 2/3 complex subunit 4 OS=Mus musculus OX=10090 GN=Arpc4 PE=1 SV=3	P59999	Arpc4	20 kDa	3
Cell division control protein 42 homolog OS=Mus musculus OX=10090 GN=Cdc42 PE=1 SV=2	P60766	Cdc42	21 kDa	3
40S ribosomal protein S5 OS=Mus musculus OX=10090 GN=Rps5 PE=1 SV=3	P97461	Rps5	23 kDa	2
| organism=Plasmodium_berghei_ANKA | product=conserved rodent malaria protein, unknown function | location=berg06:888660-891211(-) | length=793 | sequence_SO=chromosome | SO=protein_coding	PBANKA_062310		93 kDa	5
| organism=Plasmodium_berghei_ANKA | product=elongation factor 1-beta, putative | location=berg08:599897-600670(+) | length=257 | sequence_SO=chromosome | SO=protein_coding	PBANKA_081420		30 kDa	3
Extracellular matrix protein 1 OS=Mus musculus OX=10090 GN=Ecm1 PE=1 SV=2	Q61508	Ecm1	63 kDa	3
Methionine--tRNA ligase, cytoplasmic OS=Mus musculus OX=10090 GN=Mars PE=1 SV=1	Q68FL6	Mars	101 kDa	1
Phosphatidylinositol-binding clathrin assembly protein OS=Mus musculus OX=10090 GN=Picalm PE=1 SV=1	Q7M6Y3	Picalm	72 kDa	3
Interferon-induced very large GTPase 1 OS=Mus musculus OX=10090 GN=Gvin1 PE=1 SV=1	Q80SU7	Gvin1	281 kDa
26S proteasome non-ATPase regulatory subunit 5 OS=Mus musculus OX=10090 GN=Psmd5 PE=1 SV=4	Q8BJY1	Psmd5	56 kDa	5
Leucine--tRNA ligase, cytoplasmic OS=Mus musculus OX=10090 GN=Lars PE=1 SV=2	Q8BMJ2	Lars	134 kDa	1
Structural maintenance of chromosomes protein 2 OS=Mus musculus OX=10090 GN=Smc2 PE=1 SV=2	Q8CG48	Smc2	134 kDa	0
Transaldolase OS=Mus musculus OX=10090 GN=Taldo1 PE=1 SV=2	Q93092	Taldo1	37 kDa	3
Sorting nexin-2 OS=Mus musculus OX=10090 GN=Snx2 PE=1 SV=2	Q9CWK8	Snx2	58 kDa	1
Cytosolic 5'-nucleotidase 3A OS=Mus musculus OX=10090 GN=Nt5c3a PE=1 SV=4	Q9D020	Nt5c3a	37 kDa	3
Cullin-1 OS=Mus musculus OX=10090 GN=Cul1 PE=1 SV=1	Q9WTX6	Cul1	90 kDa	3
CD97 antigen OS=Mus musculus OX=10090 GN=Cd97 PE=1 SV=2	Q9Z0M6	Cd97	90 kDa	4
Adenosine kinase OS=Mus musculus OX=10090 GN=Adk PE=1 SV=2	P55264	Adk	40 kDa	3
Plastin-1 OS=Mus musculus OX=10090 GN=Pls1 PE=1 SV=1	Q3V0K9	Pls1	70 kDa	2
Cluster of Ig heavy chain V region 6.96 OS=Mus musculus OX=10090 PE=4 SV=1 (P18528)	P18528 [3]		11 kDa	5
Cluster of 60S ribosomal protein L8 OS=Mus musculus OX=10090 GN=Rpl8 PE=1 SV=2 (P62918)	P62918 [3]	Rpl8	28 kDa	5
Cluster of | organism=Plasmodium_berghei_ANKA | product=HSP40, subfamily A, putative | location=berg06:434517-436237(-) | length=424 | sequence_SO=chromosome | SO=protein_coding (PBANKA_061090)	PBANKA_061090 [2]		48 kDa	5
Glucose-6-phosphate isomerase OS=Mus musculus OX=10090 GN=Gpi PE=1 SV=4	P06745	Gpi	63 kDa	3
Kallikrein 1-related peptidase b8 OS=Mus musculus OX=10090 GN=Klk1b8 PE=2 SV=1	P07628	Klk1b8	29 kDa	4
Protein disulfide-isomerase OS=Mus musculus OX=10090 GN=P4hb PE=1 SV=2	P09103	P4hb	57 kDa	0
Glycerol-3-phosphate dehydrogenase [NAD(+)], cytoplasmic OS=Mus musculus OX=10090 GN=Gpd1 PE=1 SV=3	P13707	Gpd1	38 kDa	3
40S ribosomal protein S16 OS=Mus musculus OX=10090 GN=Rps16 PE=1 SV=4	P14131	Rps16	16 kDa	2
Tryptophan--tRNA ligase, cytoplasmic OS=Mus musculus OX=10090 GN=Wars PE=1 SV=2	P32921	Wars	54 kDa	3
60S ribosomal protein L9 OS=Mus musculus OX=10090 GN=Rpl9 PE=2 SV=2	P51410	Rpl9	22 kDa	1
Adenylosuccinate lyase OS=Mus musculus OX=10090 GN=Adsl PE=1 SV=2	P54822	Adsl	55 kDa	2
Thyroxine-binding globulin OS=Mus musculus OX=10090 GN=Serpina7 PE=2 SV=1	P61939	Serpina7	47 kDa	4
60 kDa heat shock protein, mitochondrial OS=Mus musculus OX=10090 GN=Hspd1 PE=1 SV=1	P63038	Hspd1	61 kDa	5
Selenoprotein P OS=Mus musculus OX=10090 GN=Selenop PE=1 SV=3	P70274	Selenop	43 kDa	4
Probable ubiquitin carboxyl-terminal hydrolase FAF-X OS=Mus musculus OX=10090 GN=Usp9x PE=1 SV=2	P70398	Usp9x	291 kDa	2
| organism=Plasmodium_berghei_ANKA | product=early transcribed membrane protein (ETRAMP) | location=berg05:634391-635332(+) | length=313 | sequence_SO=chromosome | SO=protein_coding	PBANKA_051700		33 kDa	5
| organism=Plasmodium_berghei_ANKA | product=histone H4, putative | location=berg09:1550855-1551166(+) | length=103 | sequence_SO=chromosome | SO=protein_coding	PBANKA_094190		11 kDa	6
| organism=Plasmodium_berghei_ANKA | product=DNA replication licensing factor MCM6, putative (MCM6) | location=berg11:1164601-1167423(+) | length=940 | sequence_SO=chromosome | SO=protein_coding	PBANKA_113160		107 kDa	4
| organism=Plasmodium_berghei_ANKA | product=eukaryotic translation initiation factor 3 subunit 7, putative | location=berg12:213199-214812(+) | length=537 | sequence_SO=chromosome | SO=protein_coding	PBANKA_120610		62 kDa	3
| organism=Plasmodium_berghei_ANKA | product=hypoxanthine-guanine phosphoribosyltransferase, putative (HGPRT) | location=berg12:371512-372668(-) | length=231 | sequence_SO=chromosome | SO=protein_coding	PBANKA_121080		27 kDa	9
Aquaporin-1 OS=Mus musculus OX=10090 GN=Aqp1 PE=1 SV=3	Q02013	Aqp1	29 kDa	5
Rho GTPase-activating protein 1 OS=Mus musculus OX=10090 GN=Arhgap1 PE=1 SV=1	Q5FWK3	Arhgap1	50 kDa	4
Coagulation factor XIII A chain OS=Mus musculus OX=10090 GN=F13a1 PE=1 SV=3	Q8BH61	F13a1	83 kDa	6
N-fatty-acyl-amino acid synthase/hydrolase PM20D1 OS=Mus musculus OX=10090 GN=Pm20d1 PE=1 SV=1	Q8C165	Pm20d1	56 kDa	5
Structural maintenance of chromosomes protein 4 OS=Mus musculus OX=10090 GN=Smc4 PE=1 SV=1	Q8CG47	Smc4	147 kDa	0
Eukaryotic translation initiation factor 3 subunit L OS=Mus musculus OX=10090 GN=Eif3l PE=1 SV=1	Q8QZY1	Eif3l	67 kDa
Farnesyl pyrophosphate synthase OS=Mus musculus OX=10090 GN=Fdps PE=1 SV=1	Q920E5	Fdps	41 kDa	2
Flavin reductase (NADPH) OS=Mus musculus OX=10090 GN=Blvrb PE=1 SV=3	Q923D2	Blvrb	22 kDa	4
Ras-related protein Rap-1b OS=Mus musculus OX=10090 GN=Rap1b PE=1 SV=2	Q99JI6	Rap1b	21 kDa	4
Arginine--tRNA ligase, cytoplasmic OS=Mus musculus OX=10090 GN=Rars PE=1 SV=2	Q9D0I9	Rars	76 kDa	1
Argininosuccinate synthase OS=Mus musculus OX=10090 GN=Ass1 PE=1 SV=1	P16460	Ass1	47 kDa	4
Sorbitol dehydrogenase OS=Mus musculus OX=10090 GN=Sord PE=1 SV=3	Q64442	Sord	38 kDa	3
Cluster of | organism=Plasmodium_berghei_ANKA | product=60S ribosomal protein L10, putative | location=berg10:1122003-1122662(-) | length=219 | sequence_SO=chromosome | SO=protein_coding (PBANKA_102840)	PBANKA_102840 [2]		25 kDa	5
Cluster of | organism=Plasmodium_berghei_ANKA | product=long-chain acyl-CoA synthase, putative | location=berg03:414233-416494(-) | length=753 | sequence_SO=chromosome | SO=protein_coding (PBANKA_031180)	PBANKA_031180 [2]		86 kDa	3
Cluster of 60S ribosomal protein L3 OS=Mus musculus OX=10090 GN=Rpl3 PE=1 SV=3 (P27659)	P27659 [3]	Rpl3	46 kDa	2
Cluster of Ig kappa chain V-V region L6 (Fragment) OS=Mus musculus OX=10090 PE=4 SV=1 (P01638)	P01638 [2]		13 kDa	3
Cluster of Alpha-actinin-1 OS=Mus musculus OX=10090 GN=Actn1 PE=1 SV=1 (Q7TPR4)	Q7TPR4 [2]	Actn1	103 kDa	2
Proteasome subunit alpha type-3 OS=Mus musculus OX=10090 GN=Psma3 PE=1 SV=3	O70435	Psma3	28 kDa	2
Integrin beta-2 OS=Mus musculus OX=10090 GN=Itgb2 PE=1 SV=2	P11835	Itgb2	85 kDa	3
Bifunctional epoxide hydrolase 2 OS=Mus musculus OX=10090 GN=Ephx2 PE=1 SV=2	P34914	Ephx2	63 kDa	7
60S ribosomal protein L13 OS=Mus musculus OX=10090 GN=Rpl13 PE=1 SV=3	P47963	Rpl13	24 kDa	3
Eukaryotic translation initiation factor 3 subunit E OS=Mus musculus OX=10090 GN=Eif3e PE=1 SV=1	P60229	Eif3e	52 kDa	1
60S ribosomal protein L30 OS=Mus musculus OX=10090 GN=Rpl30 PE=1 SV=2	P62889	Rpl30	13 kDa	2
| organism=Plasmodium_berghei_ANKA | product=exportin 1, putative | location=berg04:64222-68233(-) | length=1246 | sequence_SO=chromosome | SO=protein_coding	PBANKA_040150		147 kDa	3
| organism=Plasmodium_berghei_ANKA | product=methionine--tRNA ligase, putative | location=berg05:682838-685534(+) | length=898 | sequence_SO=chromosome | SO=protein_coding	PBANKA_051870		105 kDa	3
| organism=Plasmodium_berghei_ANKA | product=ADP/ATP transporter on adenylate translocase, putative | location=berg05:737041-737946(-) | length=301 | sequence_SO=chromosome | SO=protein_coding	PBANKA_052020		34 kDa	7
| organism=Plasmodium_berghei_ANKA | product=tryptophan-rich antigen, putative | location=berg06:899706-900832(-) | length=342 | sequence_SO=chromosome | SO=protein_coding	PBANKA_062330		42 kDa	4
| organism=Plasmodium_berghei_ANKA | product=Ran-binding protein, putative | location=berg08:494927-499506(-) | length=1160 | sequence_SO=chromosome | SO=protein_coding	PBANKA_081130		135 kDa	2
| organism=Plasmodium_berghei_ANKA | product=merozoite surface protein 8 (MSP8) | location=berg11:86718-87947(-) | length=409 | sequence_SO=chromosome | SO=protein_coding	PBANKA_110220		47 kDa	5
| organism=Plasmodium_berghei_ANKA | product=60S ribosomal protein L4, putative | location=berg11:239269-240504(-) | length=411 | sequence_SO=chromosome | SO=protein_coding	PBANKA_110670		46 kDa	5
| organism=Plasmodium_berghei_ANKA | product=oocyst capsule protein (Cap380) | location=berg12:666016-675630(+) | length=3204 | sequence_SO=chromosome | SO=protein_coding	PBANKA_121810		375 kDa	0
| organism=Plasmodium_berghei_ANKA | product=acyl-CoA synthetase, putative | location=berg12:1508785-1510809(+) | length=674 | sequence_SO=chromosome | SO=protein_coding	PBANKA_123990		77 kDa	1
| organism=Plasmodium_berghei_ANKA | product=RNA helicase, putative | location=berg14:984023-986752(-) | length=909 | sequence_SO=chromosome | SO=protein_coding	PBANKA_142690		104 kDa	2
| organism=Plasmodium_berghei_ANKA | product=eukaryotic translation initiation factor 3 subunit 10, putative | location=berg14:1063093-1066884(-) | length=1263 | sequence_SO=chromosome | SO=protein_coding	PBANKA_142870		152 kDa	2
Junction plakoglobin OS=Mus musculus OX=10090 GN=Jup PE=1 SV=3	Q02257	Jup	82 kDa	1
Alpha-1B-glycoprotein OS=Mus musculus OX=10090 GN=A1bg PE=1 SV=1	Q19LI2	A1bg	57 kDa	4
Aldehyde dehydrogenase family 16 member A1 OS=Mus musculus OX=10090 GN=Aldh16a1 PE=1 SV=2	Q571I9	Aldh16a1	85 kDa	3
Myosin light polypeptide 6 OS=Mus musculus OX=10090 GN=Myl6 PE=1 SV=3	Q60605	Myl6	17 kDa	4
ATP-dependent RNA helicase DDX3X OS=Mus musculus OX=10090 GN=Ddx3x PE=1 SV=3	Q62167	Ddx3x	73 kDa	1
Carboxylesterase 3A OS=Mus musculus OX=10090 GN=Ces3a PE=1 SV=2	Q63880	Ces3a	63 kDa	4
Trifunctional purine biosynthetic protein adenosine-3 OS=Mus musculus OX=10090 GN=Gart PE=1 SV=3	Q64737	Gart	108 kDa	1
Cytosolic phospholipase A2 gamma OS=Mus musculus OX=10090 GN=Pla2g4c PE=1 SV=1	Q64GA5	Pla2g4c	68 kDa	2
Eukaryotic translation initiation factor 4 gamma 1 OS=Mus musculus OX=10090 GN=Eif4g1 PE=1 SV=1	Q6NZJ6	Eif4g1	176 kDa	2
2-aminomuconic semialdehyde dehydrogenase OS=Mus musculus OX=10090 GN=Aldh8a1 PE=1 SV=1	Q8BH00	Aldh8a1	54 kDa	5
Triokinase/FMN cyclase OS=Mus musculus OX=10090 GN=Tkfc PE=1 SV=1	Q8VC30	Tkfc	60 kDa	5
COP9 signalosome complex subunit 1 OS=Mus musculus OX=10090 GN=Gps1 PE=1 SV=1	Q99LD4	Gps1	53 kDa	4
Ribose-phosphate pyrophosphokinase 1 OS=Mus musculus OX=10090 GN=Prps1 PE=1 SV=4	Q9D7G0	Prps1	35 kDa	4
Chitotriosidase-1 OS=Mus musculus OX=10090 GN=Chit1 PE=1 SV=2	Q9D7Q1	Chit1	51 kDa	5
Alpha-soluble NSF attachment protein OS=Mus musculus OX=10090 GN=Napa PE=1 SV=1	Q9DB05	Napa	33 kDa	2
Immunoglobulin J chain OS=Mus musculus OX=10090 GN=Jchain PE=1 SV=4	P01592	Jchain	18 kDa	3
Microtubule-associated protein RP/EB family member 1 OS=Mus musculus OX=10090 GN=Mapre1 PE=1 SV=3	Q61166	Mapre1	30 kDa	1
Ubiquitin carboxyl-terminal hydrolase 5 OS=Mus musculus OX=10090 GN=Usp5 PE=1 SV=1	P56399	Usp5	96 kDa	3
| organism=Plasmodium_berghei_ANKA | product=nicotinate phosphoribosyltransferase, putative | location=berg11:1019178-1021247(-) | length=689 | sequence_SO=chromosome | SO=protein_coding	PBANKA_112770		80 kDa	3
Ig kappa chain V-II region 26-10 OS=Mus musculus OX=10090 PE=1 SV=1	P01631		12 kDa	2
Beta-nerve growth factor OS=Mus musculus OX=10090 GN=Ngf PE=1 SV=2	P01139	Ngf	27 kDa	4
60S ribosomal protein L13a OS=Mus musculus OX=10090 GN=Rpl13a PE=1 SV=4	P19253	Rpl13a	23 kDa	1
Cluster of Phosphoglycerate mutase 2 OS=Mus musculus OX=10090 GN=Pgam2 PE=1 SV=3 (O70250)	O70250 [2]	Pgam2	29 kDa	2
Cluster of | organism=Plasmodium_berghei_ANKA | product=heat shock protein hsp70 homologue, putative (UIS24) | location=berg09:583130-585121(-) | length=663 | sequence_SO=chromosome | SO=protein_coding (PBANKA_091440)	PBANKA_091440 [2]		73 kDa	3
Cluster of L-lactate dehydrogenase A chain OS=Mus musculus OX=10090 GN=Ldha PE=1 SV=3 (P06151)	P06151 [2]	Ldha	36 kDa	4
Cluster of | organism=Plasmodium_berghei_ANKA | product=60S ribosomal protein L5, putative | location=berg10:771314-772936(+) | length=293 | sequence_SO=chromosome | SO=protein_coding (PBANKA_101950)	PBANKA_101950 [2]		34 kDa	1
Ig kappa chain V-II region 7S34.1 OS=Mus musculus OX=10090 PE=1 SV=1	P01630		12 kDa	3
Ig lambda-2 chain C region OS=Mus musculus OX=10090 GN=Iglc2 PE=1 SV=1	P01844	Iglc2	11 kDa	4
Beta-1,4-galactosyltransferase 1 OS=Mus musculus OX=10090 GN=B4galt1 PE=1 SV=1	P15535	B4galt1	44 kDa	2
Signal transducer and activator of transcription 1 OS=Mus musculus OX=10090 GN=Stat1 PE=1 SV=1	P42225	Stat1	87 kDa
60S ribosomal protein L5 OS=Mus musculus OX=10090 GN=Rpl5 PE=1 SV=3	P47962	Rpl5	34 kDa	1
40S ribosomal protein S15a OS=Mus musculus OX=10090 GN=Rps15a PE=1 SV=2	P62245	Rps15a	15 kDa	2
40S ribosomal protein S13 OS=Mus musculus OX=10090 GN=Rps13 PE=1 SV=2	P62301	Rps13	17 kDa	3
| organism=Plasmodium_berghei_ANKA | product=LCCL domain-containing protein (CCp5) | location=berg02:169994-173221(-) | length=1049 | sequence_SO=chromosome | SO=protein_coding	PBANKA_020450		122 kDa
| organism=Plasmodium_berghei_ANKA | product=GPI-anchored micronemal antigen, putative (GAMA) | location=berg07:77182-79059(+) | length=625 | sequence_SO=chromosome | SO=protein_coding	PBANKA_070190		71 kDa	3
| organism=Plasmodium_berghei_ANKA | product=protein disulfide isomerase related protein, putative | location=berg09:581032-582303(+) | length=423 | sequence_SO=chromosome | SO=protein_coding	PBANKA_091430		49 kDa	4
| organism=Plasmodium_berghei_ANKA | product=CCR4-associated factor 16, putative (CAF16) | location=berg10:455384-456898(+) | length=257 | sequence_SO=chromosome | SO=protein_coding	PBANKA_101080		30 kDa	4
| organism=Plasmodium_berghei_ANKA | product=DNA replication licensing factor MCM3, putative (MCM3) | location=berg12:1564154-1567082(-) | length=945 | sequence_SO=chromosome | SO=protein_coding	PBANKA_124180		107 kDa	1
Ras suppressor protein 1 OS=Mus musculus OX=10090 GN=Rsu1 PE=1 SV=3	Q01730	Rsu1	32 kDa	2
Ubiquitin-like protein ISG15 OS=Mus musculus OX=10090 GN=Isg15 PE=1 SV=4	Q64339	Isg15	18 kDa	5
Transportin-1 OS=Mus musculus OX=10090 GN=Tnpo1 PE=1 SV=2	Q8BFY9	Tnpo1	102 kDa	2
Large neutral amino acids transporter small subunit 3 OS=Mus musculus OX=10090 GN=Slc43a1 PE=1 SV=1	Q8BSM7	Slc43a1	63 kDa	3
Condensin complex subunit 1 OS=Mus musculus OX=10090 GN=Ncapd2 PE=1 SV=2	Q8K2Z4	Ncapd2	156 kDa	0
Eukaryotic translation initiation factor 3 subunit C OS=Mus musculus OX=10090 GN=Eif3c PE=1 SV=1	Q8R1B4	Eif3c	106 kDa	1
60S ribosomal protein L11 OS=Mus musculus OX=10090 GN=Rpl11 PE=1 SV=4	Q9CXW4	Rpl11	20 kDa	2
60S ribosomal protein L4 OS=Mus musculus OX=10090 GN=Rpl4 PE=1 SV=3	Q9D8E6	Rpl4	47 kDa	0
N-acetylneuraminate lyase OS=Mus musculus OX=10090 GN=Npl PE=1 SV=1	Q9DCJ9	Npl	35 kDa	3
| organism=Plasmodium_berghei_ANKA | product=60S ribosomal protein L12, putative | location=berg12:1209071-1209860(-) | length=165 | sequence_SO=chromosome | SO=protein_coding	PBANKA_123180		18 kDa	4
| organism=Plasmodium_berghei_ANKA | product=40S ribosomal protein S18, putative | location=berg09:844438-845119(+) | length=156 | sequence_SO=chromosome | SO=protein_coding	PBANKA_092210		18 kDa	3
| organism=Plasmodium_berghei_ANKA | product=ADP-ribosylation factor, putative (ARF1) | location=berg05:203357-204429(-) | length=181 | sequence_SO=chromosome | SO=protein_coding	PBANKA_050510 (+1)		21 kDa	3
| organism=Plasmodium_berghei_ANKA | product=DnaJ protein, putative | location=berg12:889813-892263(+) | length=816 | sequence_SO=chromosome | SO=protein_coding	PBANKA_122420		93 kDa	1
| organism=Plasmodium_berghei_ANKA | product=Rab6 | location=berg09:181624-182782(+) | length=207 | sequence_SO=chromosome | SO=protein_coding	PBANKA_090410 (+1)		24 kDa	4
Nicotinate phosphoribosyltransferase OS=Mus musculus OX=10090 GN=Naprt PE=1 SV=1	Q8CC86	Naprt	58 kDa	1
Cathelicidin antimicrobial peptide OS=Mus musculus OX=10090 GN=Camp PE=1 SV=2	P51437	Camp	19 kDa	4
| organism=Plasmodium_berghei_ANKA | product=thioredoxin-related protein, putative | location=berg13:2465392-2466279(-) | length=206 | sequence_SO=chromosome | SO=protein_coding	PBANKA_136520		24 kDa	4
| organism=Plasmodium_berghei_ANKA | product=60S ribosomal protein L6, putative | location=berg13:1498408-1499540(-) | length=190 | sequence_SO=chromosome | SO=protein_coding	PBANKA_133830		22 kDa	3
Cluster of ATP-dependent 6-phosphofructokinase, muscle type OS=Mus musculus OX=10090 GN=Pfkm PE=1 SV=3 (P47857)	P47857 [2]	Pfkm	85 kDa	4
Cluster of | organism=Plasmodium_berghei_ANKA | product=DNA/RNA-binding protein Alba 1, putative (ALBA1) | location=berg14:854273-855001(-) | length=242 | sequence_SO=chromosome | SO=protein_coding (PBANKA_142330)	PBANKA_142330 [2]		27 kDa	5
Cluster of | organism=Plasmodium_berghei_ANKA | product=26S proteasome regulatory subunit, putative | location=berg14:200094-201275(-) | length=393 | sequence_SO=chromosome | SO=protein_coding (PBANKA_140490)	PBANKA_140490 [2]		45 kDa	3
Cluster of | organism=Plasmodium_berghei_ANKA | product=proline--tRNA ligase, putative | location=berg14:1093232-1095499(-) | length=755 | sequence_SO=chromosome | SO=protein_coding (PBANKA_142960)	PBANKA_142960 [2]		88 kDa	4
Bridging integrator 2 OS=Mus musculus OX=10090 GN=Bin2 PE=1 SV=1	D3Z6Q9	Bin2	53 kDa	1
eIF-2-alpha kinase activator GCN1 OS=Mus musculus OX=10090 GN=Gcn1 PE=1 SV=1	E9PVA8	Gcn1	293 kDa
COP9 signalosome complex subunit 4 OS=Mus musculus OX=10090 GN=Cops4 PE=1 SV=1	O88544	Cops4	46 kDa	3
Polypyrimidine tract-binding protein 1 OS=Mus musculus OX=10090 GN=Ptbp1 PE=1 SV=2	P17225	Ptbp1	56 kDa	1
26S proteasome non-ATPase regulatory subunit 7 OS=Mus musculus OX=10090 GN=Psmd7 PE=1 SV=2	P26516	Psmd7	37 kDa	1
Vascular cell adhesion protein 1 OS=Mus musculus OX=10090 GN=Vcam1 PE=1 SV=1	P29533	Vcam1	81 kDa	1
60S ribosomal protein L18 OS=Mus musculus OX=10090 GN=Rpl18 PE=1 SV=3	P35980	Rpl18	22 kDa	2
Ran GTPase-activating protein 1 OS=Mus musculus OX=10090 GN=Rangap1 PE=1 SV=2	P46061	Rangap1	64 kDa	4
Phosphatidylinositol transfer protein alpha isoform OS=Mus musculus OX=10090 GN=Pitpna PE=1 SV=2	P53810	Pitpna	32 kDa	1
| organism=Plasmodium_berghei_ANKA | product=conserved Plasmodium protein, unknown function | location=berg08:474627-476656(-) | length=562 | sequence_SO=chromosome | SO=protein_coding	PBANKA_081080		67 kDa	1
| organism=Plasmodium_berghei_ANKA | product=erythrocyte membrane associated protein 1 (EMAP1) | location=berg08:1339963-1341696(-) | length=330 | sequence_SO=chromosome | SO=protein_coding	PBANKA_083680		38 kDa	3
| organism=Plasmodium_berghei_ANKA | product=heat shock protein 90, putative | location=berg09:1132541-1134949(+) | length=802 | sequence_SO=chromosome | SO=protein_coding	PBANKA_092990		92 kDa	4
| organism=Plasmodium_berghei_ANKA | product=eukaryotic translation initiation factor 2 gamma subunit, putative | location=berg10:1249838-1251235(-) | length=465 | sequence_SO=chromosome | SO=protein_coding	PBANKA_103190		51 kDa	4
| organism=Plasmodium_berghei_ANKA | product=FACT complex subunit SPT16 (FACT-L) | location=berg12:1222103-1225637(+) | length=1096 | sequence_SO=chromosome | SO=protein_coding	PBANKA_123220		128 kDa	1
| organism=Plasmodium_berghei_ANKA | product=eukaryotic translation initiation factor 3 subunit, putative | location=berg12:1233307-1235457(+) | length=716 | sequence_SO=chromosome | SO=protein_coding	PBANKA_123250		84 kDa	3
| organism=Plasmodium_berghei_ANKA | product=40S ribosomal protein S7, putative | location=berg14:54945-55712(-) | length=194 | sequence_SO=chromosome | SO=protein_coding	PBANKA_140130		22 kDa	4
D-3-phosphoglycerate dehydrogenase OS=Mus musculus OX=10090 GN=Phgdh PE=1 SV=3	Q61753	Phgdh	57 kDa	5
V-type proton ATPase subunit H OS=Mus musculus OX=10090 GN=Atp6v1h PE=1 SV=1	Q8BVE3	Atp6v1h	56 kDa	1
Eukaryotic translation initiation factor 3 subunit B OS=Mus musculus OX=10090 GN=Eif3b PE=1 SV=1	Q8JZQ9	Eif3b	91 kDa	2
N-acetylmuramoyl-L-alanine amidase OS=Mus musculus OX=10090 GN=Pglyrp2 PE=1 SV=1	Q8VCS0	Pglyrp2	58 kDa	3
Vacuolar protein sorting-associated protein 35 OS=Mus musculus OX=10090 GN=Vps35 PE=1 SV=1	Q9EQH3	Vps35	92 kDa	3
Histone H2B type 1-F/J/L OS=Mus musculus OX=10090 GN=Hist1h2bf PE=1 SV=2	P10853 (+7)	Hist1h2bf	14 kDa	3
Profilin-1 OS=Mus musculus OX=10090 GN=Pfn1 PE=1 SV=2	P62962	Pfn1	15 kDa	2
| organism=Plasmodium_berghei_ANKA | product=6-phosphofructokinase, putative (PFK9) | location=berg08:663800-667699(-) | length=1299 | sequence_SO=chromosome | SO=protein_coding	PBANKA_081640		147 kDa	4
Secreted phosphoprotein 24 OS=Mus musculus OX=10090 GN=Spp2 PE=1 SV=2	Q8K1I3	Spp2	23 kDa	2
Glycerol-3-phosphate phosphatase OS=Mus musculus OX=10090 GN=Pgp PE=1 SV=1	Q8CHP8	Pgp	35 kDa	3
| organism=Plasmodium_berghei_ANKA | product=40S ribosomal protein S14, putative | location=berg12:1175827-1176550(-) | length=151 | sequence_SO=chromosome | SO=protein_coding	PBANKA_123100		16 kDa	3
Rho GDP-dissociation inhibitor 2 OS=Mus musculus OX=10090 GN=Arhgdib PE=1 SV=3	Q61599	Arhgdib	23 kDa	1
Cullin-3 OS=Mus musculus OX=10090 GN=Cul3 PE=1 SV=1	Q9JLV5	Cul3	89 kDa	2
Neutrophil gelatinase-associated lipocalin OS=Mus musculus OX=10090 GN=Lcn2 PE=1 SV=1	P11672	Lcn2	23 kDa	3
Sorting nexin-3 OS=Mus musculus OX=10090 GN=Snx3 PE=1 SV=3	O70492	Snx3	19 kDa	2
Succinate--CoA ligase [ADP/GDP-forming] subunit alpha, mitochondrial OS=Mus musculus OX=10090 GN=Suclg1 PE=1 SV=4	Q9WUM5	Suclg1	36 kDa
| organism=Plasmodium_berghei_ANKA | product=40S ribosomal protein S8e, putative | location=berg10:1344631-1345617(-) | length=218 | sequence_SO=chromosome | SO=protein_coding	PBANKA_103390		25 kDa	2
Coatomer subunit beta OS=Mus musculus OX=10090 GN=Copb1 PE=1 SV=1	Q9JIF7	Copb1	107 kDa
Spectrin alpha chain, non-erythrocytic 1 OS=Mus musculus OX=10090 GN=Sptan1 PE=1 SV=4	P16546	Sptan1	285 kDa	1
Ras-related protein Rab-6A OS=Mus musculus OX=10090 GN=Rab6a PE=1 SV=4	P35279	Rab6a	24 kDa	1
Cluster of Glucose-6-phosphate 1-dehydrogenase X OS=Mus musculus OX=10090 GN=G6pdx PE=1 SV=3 (Q00612)	Q00612 [2]	G6pdx	59 kDa	1
Cluster of Mast cell protease 1 OS=Mus musculus OX=10090 GN=Mcpt1 PE=1 SV=2 (P11034)	P11034 [2]	Mcpt1	27 kDa	3
Cluster of Ig kappa chain V-V region MOPC 21 OS=Mus musculus OX=10090 PE=1 SV=1 (P01634)	P01634 [2]		15 kDa	3
Cluster of Transforming protein RhoA OS=Mus musculus OX=10090 GN=Rhoa PE=1 SV=1 (Q9QUI0)	Q9QUI0 [2]	Rhoa	22 kDa	2
Cluster of Ras-related protein Rab-11B OS=Mus musculus OX=10090 GN=Rab11b PE=1 SV=3 (P46638)	P46638 [3]	Rab11b	24 kDa	2
Cluster of | organism=Plasmodium_berghei_ANKA | product=protein disulfide isomerase | location=berg07:106464-108021(+) | length=482 | sequence_SO=chromosome | SO=protein_coding (PBANKA_070280)	PBANKA_070280 [2]		55 kDa	3
Cluster of cAMP-dependent protein kinase catalytic subunit alpha OS=Mus musculus OX=10090 GN=Prkaca PE=1 SV=3 (P05132)	P05132 [2]	Prkaca	41 kDa	1
Cluster of Guanylate-binding protein 2 OS=Mus musculus OX=10090 GN=Gbp2 PE=1 SV=1 (Q9Z0E6)	Q9Z0E6 [3]	Gbp2	67 kDa
Cluster of | organism=Plasmodium_falciparum_3D7 | product=chromosome condensation protein, putative | location=Pf3D7_05_v3:381077-386203(+) | length=1708 | sequence_SO=chromosome | SO=protein_coding (PF3D7_0509100)	PF3D7_0509100 [2]		202 kDa
GTP-binding protein 1 OS=Mus musculus OX=10090 GN=Gtpbp1 PE=1 SV=2	O08582	Gtpbp1	72 kDa	0
Integrin-linked protein kinase OS=Mus musculus OX=10090 GN=Ilk PE=1 SV=2	O55222	Ilk	51 kDa	3
Coronin-1A OS=Mus musculus OX=10090 GN=Coro1a PE=1 SV=5	O89053	Coro1a	51 kDa	1
AP-1 complex subunit mu-1 OS=Mus musculus OX=10090 GN=Ap1m1 PE=1 SV=3	P35585	Ap1m1	49 kDa	1
| organism=Plasmodium_berghei_ANKA | product=eukaryotic translation initiation factor 3 subunit 8, putative | location=berg06:188777-191984(-) | length=925 | sequence_SO=chromosome | SO=protein_coding	PBANKA_060480		109 kDa	1
| organism=Plasmodium_berghei_ANKA | product=GTP-binding protein, putative | location=berg06:758550-759952(+) | length=393 | sequence_SO=chromosome | SO=protein_coding	PBANKA_061990		45 kDa	3
| organism=Plasmodium_berghei_ANKA | product=conserved Plasmodium protein, unknown function | location=berg08:1015531-1016537(+) | length=222 | sequence_SO=chromosome | SO=protein_coding	PBANKA_082670		25 kDa	5
| organism=Plasmodium_berghei_ANKA | product=proliferation-associated protein 2g4, putative | location=berg10:664748-666076(+) | length=377 | sequence_SO=chromosome | SO=protein_coding	PBANKA_101630		43 kDa	2
| organism=Plasmodium_berghei_ANKA | product=adenosylhomocysteinase, putative (SAHH) | location=berg12:1336220-1337659(+) | length=479 | sequence_SO=chromosome | SO=protein_coding	PBANKA_123560		54 kDa	5
| organism=Plasmodium_berghei_ANKA | product=conserved Plasmodium protein, unknown function | location=berg13:1081475-1083034(-) | length=301 | sequence_SO=chromosome | SO=protein_coding	PBANKA_132730		34 kDa	4
| organism=Plasmodium_berghei_ANKA | product=60S ribosomal protein L18, putative | location=berg13:2049497-2050322(-) | length=184 | sequence_SO=chromosome | SO=protein_coding	PBANKA_135440		22 kDa	4
| organism=Plasmodium_berghei_ANKA | product=replication factor C subunit 4, putative | location=berg14:2091359-2092601(+) | length=336 | sequence_SO=chromosome | SO=protein_coding	PBANKA_145510		38 kDa	1
| organism=Plasmodium_berghei_ANKA | product=FK506-binding protein (FKBP)-type peptidyl-prolyl isomerase, putative (FKBP35) | location=berg14:2248833-2249753(-) | length=306 | sequence_SO=chromosome | SO=protein_coding	PBANKA_146040		35 kDa	2
Glutamine--tRNA ligase OS=Mus musculus OX=10090 GN=Qars PE=1 SV=1	Q8BML9	Qars	88 kDa
Asparagine--tRNA ligase, cytoplasmic OS=Mus musculus OX=10090 GN=Nars PE=1 SV=2	Q8BP47	Nars	64 kDa
Tubulin-specific chaperone D OS=Mus musculus OX=10090 GN=Tbcd PE=1 SV=1	Q8BYA0	Tbcd	133 kDa	1
GTPase IMAP family member 4 OS=Mus musculus OX=10090 GN=Gimap4 PE=1 SV=2	Q99JY3	Gimap4	38 kDa
Peroxiredoxin-like 2A OS=Mus musculus OX=10090 GN=Prxl2a PE=1 SV=2	Q9CYH2	Prxl2a	24 kDa	1
Glycine--tRNA ligase OS=Mus musculus OX=10090 GN=Gars PE=1 SV=1	Q9CZD3	Gars	82 kDa	1
40S ribosomal protein S19 OS=Mus musculus OX=10090 GN=Rps19 PE=1 SV=3	Q9CZX8	Rps19	16 kDa	2
Eukaryotic translation initiation factor 3 subunit F OS=Mus musculus OX=10090 GN=Eif3f PE=1 SV=2	Q9DCH4	Eif3f	38 kDa	1
Importin-7 OS=Mus musculus OX=10090 GN=Ipo7 PE=1 SV=2	Q9EPL8	Ipo7	119 kDa	1
Endoplasmic reticulum aminopeptidase 1 OS=Mus musculus OX=10090 GN=Erap1 PE=1 SV=2	Q9EQH2	Erap1	107 kDa	1
Complement factor D OS=Mus musculus OX=10090 GN=Cfd PE=1 SV=1	P03953	Cfd	28 kDa	3
| organism=Plasmodium_berghei_ANKA | product=proteasome regulatory subunit, putative | location=berg11:1622789-1624037(-) | length=311 | sequence_SO=chromosome | SO=protein_coding	PBANKA_114400		35 kDa	3
| organism=Plasmodium_berghei_ANKA | product=multidrug resistance protein, putative (MDR1) | location=berg12:1430325-1434584(+) | length=1419 | sequence_SO=chromosome | SO=protein_coding	PBANKA_123780		161 kDa	4
Coagulation factor XIII B chain OS=Mus musculus OX=10090 GN=F13b PE=1 SV=2	Q07968	F13b	76 kDa	3
| organism=Plasmodium_berghei_ANKA | product=histone H2B, putative (H2B) | location=berg09:1547427-1547783(-) | length=118 | sequence_SO=chromosome | SO=protein_coding	PBANKA_094180 (+1)		13 kDa	3
Vasorin OS=Mus musculus OX=10090 GN=Vasn PE=2 SV=2	Q9CZT5	Vasn	72 kDa	1
Vacuolar protein sorting-associated protein 13C OS=Mus musculus OX=10090 GN=Vps13c PE=1 SV=2	Q8BX70	Vps13c	420 kDa	1
| organism=Plasmodium_berghei_ANKA | product=40S ribosomal protein S2B, putative | location=berg05:447286-448370(+) | length=263 | sequence_SO=chromosome | SO=protein_coding	PBANKA_051090		30 kDa	3
Angiotensin-converting enzyme OS=Mus musculus OX=10090 GN=Ace PE=1 SV=3	P09470	Ace	151 kDa	1
| organism=Plasmodium_berghei_ANKA | product=40S ribosomal protein S5, putative | location=berg06:738544-739318(-) | length=194 | sequence_SO=chromosome | SO=protein_coding	PBANKA_061910		22 kDa	5
Serine/threonine-protein phosphatase 6 regulatory subunit 3 OS=Mus musculus OX=10090 GN=Ppp6r3 PE=1 SV=1	Q922D4	Ppp6r3	95 kDa	1
40S ribosomal protein S8 OS=Mus musculus OX=10090 GN=Rps8 PE=1 SV=2	P62242	Rps8	24 kDa	2
| organism=Plasmodium_berghei_ANKA | product=60S ribosomal protein L14, putative | location=berg10:560912-561776(-) | length=156 | sequence_SO=chromosome | SO=protein_coding	PBANKA_101310		18 kDa	1
| organism=Plasmodium_berghei_ANKA | product=alanine--tRNA ligase, putative (AlaRS) | location=berg11:1609448-1613104(+) | length=1218 | sequence_SO=chromosome | SO=protein_coding	PBANKA_114360		141 kDa	2
| organism=Plasmodium_berghei_ANKA | product=circumsporozoite-related antigen (EXP1) | location=berg09:1027730-1028455(+) | length=166 | sequence_SO=chromosome | SO=protein_coding	PBANKA_092670		18 kDa	4
| organism=Plasmodium_berghei_ANKA | product=erythrocyte membrane antigen 1 | location=berg10:26152-27311(+) | length=339 | sequence_SO=chromosome | SO=protein_coding	PBANKA_100060		38 kDa	4
ATP synthase subunit beta, mitochondrial OS=Mus musculus OX=10090 GN=Atp5f1b PE=1 SV=2	P56480	Atp5f1b	56 kDa	3
Integrin alpha-2 OS=Mus musculus OX=10090 GN=Itga2 PE=1 SV=2	Q62469	Itga2	129 kDa	2
60S ribosomal protein L7 OS=Mus musculus OX=10090 GN=Rpl7 PE=1 SV=2	P14148	Rpl7	31 kDa	3
Cluster of | organism=Plasmodium_berghei_ANKA | product=heat shock protein 101, putative | location=berg09:1175220-1178317(+) | length=907 | sequence_SO=chromosome | SO=protein_coding (PBANKA_093120)	PBANKA_093120 [2]		103 kDa	2
Cluster of Protein kinase C delta type OS=Mus musculus OX=10090 GN=Prkcd PE=1 SV=3 (P28867)	P28867 [4]	Prkcd	78 kDa
Calpain small subunit 1 OS=Mus musculus OX=10090 GN=Capns1 PE=1 SV=1	O88456	Capns1	28 kDa	1
Peptidoglycan recognition protein 1 OS=Mus musculus OX=10090 GN=Pglyrp1 PE=1 SV=1	O88593	Pglyrp1	20 kDa	1
Ig kappa chain V-V region MOPC 41 OS=Mus musculus OX=10090 GN=Gm5571 PE=1 SV=1	P01639	Gm5571	14 kDa	3
Ig lambda-1 chain C region OS=Mus musculus OX=10090 PE=1 SV=1	P01843		12 kDa	3
Ribonucleoside-diphosphate reductase large subunit OS=Mus musculus OX=10090 GN=Rrm1 PE=1 SV=2	P07742	Rrm1	90 kDa	1
Malate dehydrogenase, cytoplasmic OS=Mus musculus OX=10090 GN=Mdh1 PE=1 SV=3	P14152	Mdh1	37 kDa	2
F-actin-capping protein subunit beta OS=Mus musculus OX=10090 GN=Capzb PE=1 SV=3	P47757	Capzb	31 kDa	1
Fumarate hydratase, mitochondrial OS=Mus musculus OX=10090 GN=Fh PE=1 SV=3	P97807	Fh	54 kDa	2
| organism=Plasmodium_berghei_ANKA | product=serine repeat antigen 1 (SERA1) | location=berg03:170517-175182(-) | length=1406 | sequence_SO=chromosome | SO=protein_coding	PBANKA_030510		155 kDa	4
| organism=Plasmodium_berghei_ANKA | product=26S protease subunit regulatory subunit 6a, putative | location=berg09:707804-709159(-) | length=451 | sequence_SO=chromosome | SO=protein_coding	PBANKA_091790		51 kDa	1
| organism=Plasmodium_berghei_ANKA | product=plasmepsin X | location=berg12:828222-829886(+) | length=554 | sequence_SO=chromosome | SO=protein_coding	PBANKA_122250		63 kDa
| organism=Plasmodium_berghei_ANKA | product=eukaryotic translation initiation factor 3, subunit 6, putative | location=berg12:1597486-1599241(-) | length=527 | sequence_SO=chromosome | SO=protein_coding	PBANKA_124280		63 kDa	1
| organism=Plasmodium_berghei_ANKA | product=60S ribosomal protein L27, putative | location=berg13:960103-961256(-) | length=146 | sequence_SO=chromosome | SO=protein_coding	PBANKA_132440		17 kDa	2
Synaptic vesicle membrane protein VAT-1 homolog OS=Mus musculus OX=10090 GN=Vat1 PE=1 SV=3	Q62465	Vat1	43 kDa	0
Serpin A11 OS=Mus musculus OX=10090 GN=Serpina11 PE=2 SV=1	Q8CIE0	Serpina11	47 kDa	1
1-phosphatidylinositol 4,5-bisphosphate phosphodiesterase gamma-2 OS=Mus musculus OX=10090 GN=Plcg2 PE=1 SV=1	Q8CIH5	Plcg2	148 kDa	1
Dynamin-1-like protein OS=Mus musculus OX=10090 GN=Dnm1l PE=1 SV=2	Q8K1M6	Dnm1l	83 kDa	0
Sarcoplasmic/endoplasmic reticulum calcium ATPase 1 OS=Mus musculus OX=10090 GN=Atp2a1 PE=1 SV=1	Q8R429	Atp2a1	109 kDa	1
Fructose-1,6-bisphosphatase 1 OS=Mus musculus OX=10090 GN=Fbp1 PE=1 SV=3	Q9QXD6	Fbp1	37 kDa	6
Large proline-rich protein BAG6 OS=Mus musculus OX=10090 GN=Bag6 PE=1 SV=1	Q9Z1R2	Bag6	121 kDa	0
Glutamate--cysteine ligase regulatory subunit OS=Mus musculus OX=10090 GN=Gclm PE=1 SV=1	O09172	Gclm	31 kDa	2
Macrophage colony-stimulating factor 1 receptor OS=Mus musculus OX=10090 GN=Csf1r PE=1 SV=3	P09581	Csf1r	109 kDa	2
Nucleosome assembly protein 1-like 1 OS=Mus musculus OX=10090 GN=Nap1l1 PE=1 SV=2	P28656	Nap1l1	45 kDa	2
| organism=Plasmodium_berghei_ANKA | product=ATPase, putative | location=berg06:417517-421935(-) | length=1472 | sequence_SO=chromosome | SO=protein_coding	PBANKA_061040		166 kDa	3
| organism=Plasmodium_berghei_ANKA | product=40S ribosomal protein S16, putative | location=berg14:861715-862554(+) | length=144 | sequence_SO=chromosome | SO=protein_coding	PBANKA_142360		16 kDa	3
| organism=Plasmodium_berghei_ANKA | product=calcyclin binding protein, putative | location=berg14:1975548-1976228(-) | length=226 | sequence_SO=chromosome | SO=protein_coding	PBANKA_145260		27 kDa	1
60S ribosomal protein L14 OS=Mus musculus OX=10090 GN=Rpl14 PE=1 SV=3	Q9CR57	Rpl14	24 kDa	2
Betaine--homocysteine S-methyltransferase 1 OS=Mus musculus OX=10090 GN=Bhmt PE=1 SV=1	O35490	Bhmt	45 kDa	3
Integrin beta-1 OS=Mus musculus OX=10090 GN=Itgb1 PE=1 SV=1	P09055	Itgb1	88 kDa	3
| organism=Plasmodium_berghei_ANKA | product=60S ribosomal protein L21e, putative | location=berg10:746316-746801(+) | length=161 | sequence_SO=chromosome | SO=protein_coding	PBANKA_101860		19 kDa	3
T-cell-specific guanine nucleotide triphosphate-binding protein 2 OS=Mus musculus OX=10090 GN=Tgtp2 PE=1 SV=2	Q3T9E4	Tgtp2	47 kDa	2
Eukaryotic translation initiation factor 3 subunit H OS=Mus musculus OX=10090 GN=Eif3h PE=1 SV=1	Q91WK2	Eif3h	40 kDa	1
Nicotinate-nucleotide pyrophosphorylase [carboxylating] OS=Mus musculus OX=10090 GN=Qprt PE=1 SV=1	Q91X91	Qprt	32 kDa	3
General vesicular transport factor p115 OS=Mus musculus OX=10090 GN=Uso1 PE=1 SV=2	Q9Z1Z0	Uso1	107 kDa	2
Integrin beta-3 OS=Mus musculus OX=10090 GN=Itgb3 PE=1 SV=2	O54890	Itgb3	87 kDa	3
| organism=Plasmodium_berghei_ANKA | product=cysteine--tRNA ligase, putative | location=berg12:498364-500998(-) | length=668 | sequence_SO=chromosome | SO=protein_coding	PBANKA_121360		78 kDa	3
| organism=Plasmodium_berghei_ANKA | product=40S ribosomal protein S17, putative | location=berg14:2114620-2115405(+) | length=137 | sequence_SO=chromosome | SO=protein_coding	PBANKA_145610		16 kDa	3
Acetyl-CoA acetyltransferase, cytosolic OS=Mus musculus OX=10090 GN=Acat2 PE=1 SV=2	Q8CAY6	Acat2	41 kDa	1
Transforming growth factor-beta-induced protein ig-h3 OS=Mus musculus OX=10090 GN=Tgfbi PE=1 SV=1	P82198	Tgfbi	75 kDa	2
Poly(rC)-binding protein 1 OS=Mus musculus OX=10090 GN=Pcbp1 PE=1 SV=1	P60335	Pcbp1	37 kDa	1
60S ribosomal protein L19 OS=Mus musculus OX=10090 GN=Rpl19 PE=1 SV=1	P84099	Rpl19	23 kDa	3
| organism=Plasmodium_berghei_ANKA | product=sec61 alpha subunit, putative | location=berg13:2238774-2240611(+) | length=472 | sequence_SO=chromosome | SO=protein_coding	PBANKA_135900		52 kDa	2
60S ribosomal protein L28 OS=Mus musculus OX=10090 GN=Rpl28 PE=1 SV=2	P41105	Rpl28	16 kDa	3
Glutathione peroxidase 1 OS=Mus musculus OX=10090 GN=Gpx1 PE=1 SV=2	P11352	Gpx1	22 kDa	1
| organism=Plasmodium_berghei_ANKA | product=vacuolar ATP synthase subunit b, putative | location=berg10:187024-188664(-) | length=494 | sequence_SO=chromosome | SO=protein_coding	PBANKA_100380 (+1)		56 kDa	1
Plectin OS=Mus musculus OX=10090 GN=Plec PE=1 SV=3	Q9QXS1	Plec	534 kDa	0
S-formylglutathione hydrolase OS=Mus musculus OX=10090 GN=Esd PE=1 SV=1	Q9R0P3	Esd	31 kDa	2
GDH/6PGL endoplasmic bifunctional protein OS=Mus musculus OX=10090 GN=H6pd PE=1 SV=2	Q8CFX1	H6pd	89 kDa	1
ATP-dependent RNA helicase DDX39A OS=Mus musculus OX=10090 GN=Ddx39a PE=1 SV=1	Q8VDW0	Ddx39a	49 kDa	1
Integrin alpha-IIb OS=Mus musculus OX=10090 GN=Itga2b PE=1 SV=2	Q9QUM0	Itga2b	113 kDa	3
Vitamin K-dependent protein Z OS=Mus musculus OX=10090 GN=Proz PE=1 SV=1	Q9CQW3	Proz	44 kDa	2
Alpha-synuclein OS=Mus musculus OX=10090 GN=Snca PE=1 SV=2	O55042	Snca	14 kDa	4
Actin-related protein 2/3 complex subunit 3 OS=Mus musculus OX=10090 GN=Arpc3 PE=1 SV=3	Q9JM76	Arpc3	21 kDa	1
| organism=Plasmodium_berghei_ANKA | product=small GTP-binding protein sar1, putative (SAR1) | location=berg07:635357-636357(+) | length=191 | sequence_SO=chromosome | SO=protein_coding	PBANKA_071880		22 kDa	2
| organism=Plasmodium_berghei_ANKA | product=hexose transporter (HT) | location=berg03:82117-83634(-) | length=505 | sequence_SO=chromosome | SO=protein_coding	PBANKA_030250		56 kDa	2
Calpain-2 catalytic subunit OS=Mus musculus OX=10090 GN=Capn2 PE=1 SV=4	O08529	Capn2	80 kDa
| organism=Plasmodium_berghei_ANKA | product=NAD synthase, putative | location=berg08:1059231-1061861(+) | length=876 | sequence_SO=chromosome | SO=protein_coding	PBANKA_082750		102 kDa	2
40S ribosomal protein S9 OS=Mus musculus OX=10090 GN=Rps9 PE=1 SV=3	Q6ZWN5	Rps9	23 kDa	2
| organism=Plasmodium_berghei_ANKA | product=26S proteasome regulatory complex subunit, putative | location=berg09:744581-746452(-) | length=393 | sequence_SO=chromosome | SO=protein_coding	PBANKA_091900		47 kDa	1
Phenazine biosynthesis-like domain-containing protein 1 OS=Mus musculus OX=10090 GN=Pbld1 PE=1 SV=2	Q9DCG6	Pbld1	32 kDa	2
| organism=Plasmodium_berghei_ANKA | product=26s proteasome subunit p55, putative | location=berg05:86988-88579(+) | length=467 | sequence_SO=chromosome | SO=protein_coding	PBANKA_050220		55 kDa	1
Isochorismatase domain-containing protein 1 OS=Mus musculus OX=10090 GN=Isoc1 PE=1 SV=1	Q91V64	Isoc1	32 kDa	0
| organism=Plasmodium_berghei_ANKA | product=early transcribed membrane protein (ETRAMP) | location=berg02:92895-93428(-) | length=177 | sequence_SO=chromosome | SO=protein_coding	PBANKA_020160		19 kDa	3
V-type proton ATPase subunit B, brain isoform OS=Mus musculus OX=10090 GN=Atp6v1b2 PE=1 SV=1	P62814	Atp6v1b2	57 kDa	1
26S proteasome non-ATPase regulatory subunit 14 OS=Mus musculus OX=10090 GN=Psmd14 PE=1 SV=2	O35593	Psmd14	35 kDa	2
| organism=Plasmodium_berghei_ANKA | product=secreted ookinete protein, putative (PSOP1) | location=berg06:742115-743554(+) | length=479 | sequence_SO=chromosome | SO=protein_coding	PBANKA_061920		55 kDa	2
| organism=Plasmodium_berghei_ANKA | product=rab specific GDP dissociation inhibitor, putative (rabGDI) | location=berg14:2116418-2118403(-) | length=454 | sequence_SO=chromosome | SO=protein_coding	PBANKA_145620		52 kDa
| organism=Plasmodium_berghei_ANKA | product=glycine--tRNA ligase, putative (GlyRS) | location=berg10:876175-878613(-) | length=812 | sequence_SO=chromosome | SO=protein_coding	PBANKA_102280		95 kDa	1
Cluster of Ig heavy chain V regions TEPC 15/S107/HPCM1/HPCM2/HPCM3 OS=Mus musculus OX=10090 PE=1 SV=1 (P01787)	P01787 [5]		14 kDa	3
Cluster of V-type proton ATPase subunit E 1 OS=Mus musculus OX=10090 GN=Atp6v1e1 PE=1 SV=2 (P50518)	P50518 [2]	Atp6v1e1	26 kDa	3
Cluster of Cullin-4B OS=Mus musculus OX=10090 GN=Cul4b PE=1 SV=1 (A2A432)	A2A432 [2]	Cul4b	111 kDa	2
Cluster of Serine/threonine-protein phosphatase PP1-alpha catalytic subunit OS=Mus musculus OX=10090 GN=Ppp1ca PE=1 SV=1 (P62137)	P62137 [4]	Ppp1ca	38 kDa	1
Cluster of | organism=Plasmodium_berghei_ANKA | product=GMP synthetase, putative (GMPS) | location=berg12:378055-379689(-) | length=544 | sequence_SO=chromosome | SO=protein_coding (PBANKA_121100)	PBANKA_121100 [2]		63 kDa	0
Inositol monophosphatase 1 OS=Mus musculus OX=10090 GN=Impa1 PE=1 SV=1	O55023	Impa1	30 kDa	4
Carbonic anhydrase 2 OS=Mus musculus OX=10090 GN=Ca2 PE=1 SV=4	P00920	Ca2	29 kDa
60S ribosomal protein L6 OS=Mus musculus OX=10090 GN=Rpl6 PE=1 SV=3	P47911	Rpl6	34 kDa	1
| organism=Plasmodium_berghei_ANKA | product=40S ribosomal protein S15A, putative | location=berg04:532091-532600(+) | length=130 | sequence_SO=chromosome | SO=protein_coding	PBANKA_041460		15 kDa	5
| organism=Plasmodium_berghei_ANKA | product=secreted acid phosphatase, putative,glideosome-associated protein 50, putative (GAP50) | location=berg08:749214-750401(-) | length=395 | sequence_SO=chromosome | SO=protein_coding	PBANKA_081900		44 kDa	4
| organism=Plasmodium_berghei_ANKA | product=60S ribosomal protein L7-3, putative | location=berg10:768341-769625(-) | length=284 | sequence_SO=chromosome | SO=protein_coding	PBANKA_101940		33 kDa	3
| organism=Plasmodium_berghei_ANKA | product=conserved Plasmodium protein, unknown function | location=berg13:626663-629538(-) | length=879 | sequence_SO=chromosome | SO=protein_coding	PBANKA_131530		102 kDa
| organism=Plasmodium_berghei_ANKA | product=replication factor C3, putative | location=berg13:1051019-1052497(+) | length=344 | sequence_SO=chromosome | SO=protein_coding	PBANKA_132680		39 kDa	1
Trans-1,2-dihydrobenzene-1,2-diol dehydrogenase OS=Mus musculus OX=10090 GN=Dhdh PE=1 SV=1	Q9DBB8	Dhdh	36 kDa	3
Chloride intracellular channel protein 1 OS=Mus musculus OX=10090 GN=Clic1 PE=1 SV=3	Q9Z1Q5	Clic1	27 kDa	1
Multiple inositol polyphosphate phosphatase 1 OS=Mus musculus OX=10090 GN=Minpp1 PE=1 SV=3	Q9Z2L6	Minpp1	55 kDa	1
Eukaryotic translation initiation factor 3 subunit D OS=Mus musculus OX=10090 GN=Eif3d PE=1 SV=2	O70194	Eif3d	64 kDa
60S ribosomal protein L27a OS=Mus musculus OX=10090 GN=Rpl27a PE=1 SV=5	P14115	Rpl27a	17 kDa
Tyrosine-protein phosphatase non-receptor type 6 OS=Mus musculus OX=10090 GN=Ptpn6 PE=1 SV=2	P29351	Ptpn6	68 kDa
| organism=Plasmodium_berghei_ANKA | product=transportin, putative | location=berg11:946372-949872(+) | length=1166 | sequence_SO=chromosome | SO=protein_coding	PBANKA_112640		134 kDa	3
Serpin B6 OS=Mus musculus OX=10090 GN=Serpinb6 PE=1 SV=1	Q60854	Serpinb6	43 kDa	1
Epidermal growth factor receptor substrate 15 OS=Mus musculus OX=10090 GN=Eps15 PE=1 SV=1	P42567	Eps15	98 kDa
Reelin OS=Mus musculus OX=10090 GN=Reln PE=1 SV=3	Q60841	Reln	387 kDa	0
| organism=Plasmodium_berghei_ANKA | product=conserved Plasmodium protein, unknown function | location=berg13:844063-845838(-) | length=591 | sequence_SO=chromosome | SO=protein_coding	PBANKA_132100		71 kDa	3
4-trimethylaminobutyraldehyde dehydrogenase OS=Mus musculus OX=10090 GN=Aldh9a1 PE=1 SV=1	Q9JLJ2	Aldh9a1	54 kDa	2
Phosphomannomutase 2 OS=Mus musculus OX=10090 GN=Pmm2 PE=1 SV=1	Q9Z2M7	Pmm2	28 kDa	1
40S ribosomal protein S17 OS=Mus musculus OX=10090 GN=Rps17 PE=1 SV=2	P63276	Rps17	16 kDa	1
| organism=Plasmodium_berghei_ANKA | product=DNA polymerase delta catalytic subunit, putative | location=berg05:58521-61814(+) | length=1097 | sequence_SO=chromosome | SO=protein_coding	PBANKA_050130		127 kDa	2
| organism=Plasmodium_berghei_ANKA | product=nucleosome assembly protein (NAPS) | location=berg08:783965-785397(-) | length=267 | sequence_SO=chromosome | SO=protein_coding	PBANKA_081990		32 kDa	0
ATP-dependent RNA helicase DDX19A OS=Mus musculus OX=10090 GN=Ddx19a PE=1 SV=2	Q61655	Ddx19a	54 kDa
3-mercaptopyruvate sulfurtransferase OS=Mus musculus OX=10090 GN=Mpst PE=1 SV=4	Q99J99	Mpst	33 kDa	3
Eukaryotic translation initiation factor 2 subunit 2 OS=Mus musculus OX=10090 GN=Eif2s2 PE=1 SV=1	Q99L45	Eif2s2	38 kDa
Beta-parvin OS=Mus musculus OX=10090 GN=Parvb PE=1 SV=1	Q9ES46	Parvb	42 kDa	3
SEC14-like protein 2 OS=Mus musculus OX=10090 GN=Sec14l2 PE=1 SV=1	Q99J08	Sec14l2	46 kDa	2
C-type lectin domain family 11 member A OS=Mus musculus OX=10090 GN=Clec11a PE=1 SV=1	O88200	Clec11a	36 kDa	3
Apolipoprotein F OS=Mus musculus OX=10090 GN=Apof PE=2 SV=2	Q91V80	Apof	34 kDa	2
Actin-related protein 2/3 complex subunit 1B OS=Mus musculus OX=10090 GN=Arpc1b PE=1 SV=4	Q9WV32	Arpc1b	41 kDa	1
| organism=Plasmodium_berghei_ANKA | product=S-adenosylmethionine synthetase, putative | location=berg08:892660-893868(+) | length=402 | sequence_SO=chromosome | SO=protein_coding	PBANKA_082310		45 kDa	3
Macrophage migration inhibitory factor OS=Mus musculus OX=10090 GN=Mif PE=1 SV=2	P34884	Mif	13 kDa	2
Progranulin OS=Mus musculus OX=10090 GN=Grn PE=1 SV=2	P28798	Grn	63 kDa	1
| organism=Plasmodium_berghei_ANKA | product=tRNA binding protein, putative | location=berg13:276029-277523(-) | length=403 | sequence_SO=chromosome | SO=protein_coding	PBANKA_130620		46 kDa	2
Protein disulfide-isomerase A6 OS=Mus musculus OX=10090 GN=Pdia6 PE=1 SV=3	Q922R8	Pdia6	48 kDa	0
| organism=Plasmodium_berghei_ANKA | product=40S ribosomal protein S13, putative | location=berg11:1296144-1296599(+) | length=151 | sequence_SO=chromosome | SO=protein_coding	PBANKA_113510 (+1)		17 kDa	2
40S ribosomal protein S11 OS=Mus musculus OX=10090 GN=Rps11 PE=1 SV=3	P62281	Rps11	18 kDa	1
Corticosteroid-binding globulin OS=Mus musculus OX=10090 GN=Serpina6 PE=1 SV=1	Q06770	Serpina6	45 kDa	0
Ig kappa chain V-V region MOPC 149 OS=Mus musculus OX=10090 PE=1 SV=1	P01636		12 kDa	2
Major urinary protein 2 OS=Mus musculus OX=10090 GN=Mup2 PE=1 SV=1	P11589	Mup2	21 kDa	3
Arachidonate 12-lipoxygenase, 12S-type OS=Mus musculus OX=10090 GN=Alox12 PE=1 SV=4	P39655	Alox12	75 kDa	2
| organism=Plasmodium_berghei_ANKA | product=karyopherin alpha, putative (KARalpha) | location=berg14:908813-910450(+) | length=545 | sequence_SO=chromosome | SO=protein_coding	PBANKA_142510		61 kDa	1
Ferrochelatase, mitochondrial OS=Mus musculus OX=10090 GN=Fech PE=1 SV=2	P22315	Fech	47 kDa	0
Heparanase OS=Mus musculus OX=10090 GN=Hpse PE=1 SV=3	Q6YGZ1	Hpse	60 kDa	0
Importin-9 OS=Mus musculus OX=10090 GN=Ipo9 PE=1 SV=3	Q91YE6	Ipo9	116 kDa	2
Ig kappa chain V19-17 OS=Mus musculus OX=10090 GN=Igk-V19-17 PE=1 SV=1	P01633	Igk-V19-17	16 kDa	2
Ig kappa chain V-V region K2 (Fragment) OS=Mus musculus OX=10090 PE=1 SV=1	P01635		13 kDa	2
26S proteasome non-ATPase regulatory subunit 9 OS=Mus musculus OX=10090 GN=Psmd9 PE=1 SV=1	Q9CR00	Psmd9	25 kDa	3
| organism=Plasmodium_berghei_ANKA | product=60S ribosomal protein L18-2, putative | location=berg13:2052220-2053449(+) | length=187 | sequence_SO=chromosome | SO=protein_coding	PBANKA_135450		22 kDa	3
Ig kappa chain V-V region L7 (Fragment) OS=Mus musculus OX=10090 GN=Gm10881 PE=1 SV=1	P01642	Gm10881	13 kDa
Histone H4 OS=Mus musculus OX=10090 GN=Hist1h4a PE=1 SV=2	P62806	Hist1h4a	11 kDa
| organism=Plasmodium_berghei_ANKA | product=tyrosine--tRNA ligase, putative | location=berg12:840860-842230(-) | length=372 | sequence_SO=chromosome | SO=protein_coding	PBANKA_122280		43 kDa	1
UTP--glucose-1-phosphate uridylyltransferase OS=Mus musculus OX=10090 GN=Ugp2 PE=1 SV=3	Q91ZJ5	Ugp2	57 kDa	1
Ig heavy chain V region 441 OS=Mus musculus OX=10090 PE=4 SV=1	P01806 (+2)		13 kDa	3
Eukaryotic translation initiation factor 5A-1 OS=Mus musculus OX=10090 GN=Eif5a PE=1 SV=2	P63242	Eif5a	17 kDa	2
Protein disulfide-isomerase A3 OS=Mus musculus OX=10090 GN=Pdia3 PE=1 SV=2	P27773	Pdia3	57 kDa	1
40S ribosomal protein S20 OS=Mus musculus OX=10090 GN=Rps20 PE=1 SV=1	P60867	Rps20	13 kDa	0
Myosin regulatory light polypeptide 9 OS=Mus musculus OX=10090 GN=Myl9 PE=1 SV=3	Q9CQ19	Myl9	20 kDa	1
| organism=Plasmodium_berghei_ANKA | product=ribonucleotide reductase small subunit, putative | location=berg10:1448949-1449998(+) | length=349 | sequence_SO=chromosome | SO=protein_coding	PBANKA_103660		40 kDa	1
Monocyte differentiation antigen CD14 OS=Mus musculus OX=10090 GN=Cd14 PE=1 SV=1	P10810	Cd14	39 kDa	1
Obg-like ATPase 1 OS=Mus musculus OX=10090 GN=Ola1 PE=1 SV=1	Q9CZ30	Ola1	45 kDa	0
Major urinary protein 1 OS=Mus musculus OX=10090 GN=Mup1 PE=1 SV=1	P11588	Mup1	21 kDa	3
| organism=Plasmodium_berghei_ANKA | product=25 kDa ookinete surface antigen precursor (P25) | location=berg05:567248-567901(-) | length=217 | sequence_SO=chromosome | SO=protein_coding	PBANKA_051500		24 kDa	2
| organism=Plasmodium_berghei_ANKA | product=casein kinase 1 (CK1) | location=berg09:484699-486614(+) | length=323 | sequence_SO=chromosome | SO=protein_coding	PBANKA_091210		38 kDa	1
| organism=Plasmodium_berghei_ANKA | product=isoleucine--tRNA ligase, putative | location=berg13:1839409-1843236(-) | length=1275 | sequence_SO=chromosome | SO=protein_coding	PBANKA_134770		151 kDa	1
| organism=Plasmodium_berghei_ANKA | product=ribosomal protein L27a, putative | location=berg11:638181-638796(+) | length=148 | sequence_SO=chromosome | SO=protein_coding	PBANKA_111750		17 kDa	2
L-lactate dehydrogenase B chain OS=Mus musculus OX=10090 GN=Ldhb PE=1 SV=2	P16125	Ldhb	37 kDa	2
| organism=Plasmodium_berghei_ANKA | product=60S ribosomal protein L13, putative | location=berg12:94488-95454(-) | length=202 | sequence_SO=chromosome | SO=protein_coding	PBANKA_120240		24 kDa	2
Bifunctional purine biosynthesis protein PURH OS=Mus musculus OX=10090 GN=Atic PE=1 SV=2	Q9CWJ9	Atic	64 kDa	0
UDP-N-acetylglucosamine--peptide N-acetylglucosaminyltransferase 110 kDa subunit OS=Mus musculus OX=10090 GN=Ogt PE=1 SV=2	sp|Q8CGY8|OGT1_MOUSE-DECOY		?	0
Immunoglobulin superfamily member 10 OS=Mus musculus OX=10090 GN=Igsf10 PE=2 SV=2	Q3V1M1	Igsf10	286 kDa	2
| organism=Plasmodium_falciparum_3D7 | product=zinc finger, C3HC4 type, putative | location=Pf3D7_07_v3:1218426-1225473(+) | length=2162 | sequence_SO=chromosome | SO=protein_coding	PF3D7_0728600-DECOY		?
AP-2 complex subunit sigma OS=Mus musculus OX=10090 GN=Ap2s1 PE=1 SV=1	P62743	Ap2s1	17 kDa	2
| organism=Plasmodium_berghei_ANKA | product=RuvB-like helicase, putative (RUVB3) | location=berg11:1425338-1426765(-) | length=475 | sequence_SO=chromosome | SO=protein_coding	PBANKA_113820 (+1)		54 kDa	1
Cluster of | organism=Plasmodium_berghei_ANKA | product=early transcribed membrane protein (SEP1) | location=berg05:921245-921592(-) | length=115 | sequence_SO=chromosome | SO=protein_coding (PBANKA_052480)	PBANKA_052480 [2]		12 kDa	3
Cluster of F-actin-capping protein subunit alpha-1 OS=Mus musculus OX=10090 GN=Capza1 PE=1 SV=4 (P47753)	P47753 [2]	Capza1	33 kDa
Hypoxanthine-guanine phosphoribosyltransferase OS=Mus musculus OX=10090 GN=Hprt1 PE=1 SV=3	P00493	Hprt1	25 kDa
| organism=Plasmodium_berghei_ANKA | product=vacuolar ATP synthase subunit h, putative | location=berg14:208806-210621(-) | length=455 | sequence_SO=chromosome | SO=protein_coding	PBANKA_140510		54 kDa
Protein-glutamine gamma-glutamyltransferase 2 OS=Mus musculus OX=10090 GN=Tgm2 PE=1 SV=4	P21981	Tgm2	77 kDa	3
Eukaryotic translation initiation factor 5 OS=Mus musculus OX=10090 GN=Eif5 PE=1 SV=1	P59325	Eif5	49 kDa	1
| organism=Plasmodium_berghei_ANKA | product=replication factor C, subunit 2, putative | location=berg03:515667-516659(+) | length=330 | sequence_SO=chromosome | SO=protein_coding	PBANKA_031470		38 kDa	1
| organism=Plasmodium_berghei_ANKA | product=60S ribosomal protein L15, putative | location=berg07:605279-606166(-) | length=205 | sequence_SO=chromosome | SO=protein_coding	PBANKA_071780		24 kDa	3
| organism=Plasmodium_berghei_ANKA | product=chromosome segregation protein, putative | location=berg14:620901-624719(-) | length=1227 | sequence_SO=chromosome | SO=protein_coding	PBANKA_141690		144 kDa
Phenylalanine--tRNA ligase alpha subunit OS=Mus musculus OX=10090 GN=Farsa PE=1 SV=1	Q8C0C7	Farsa	58 kDa	1
Peptidyl-prolyl cis-trans isomerase D OS=Mus musculus OX=10090 GN=Ppid PE=1 SV=3	Q9CR16	Ppid	41 kDa
CTP synthase 1 OS=Mus musculus OX=10090 GN=Ctps1 PE=1 SV=2	P70698	Ctps1	67 kDa	1
Ras-related protein Rab-5C OS=Mus musculus OX=10090 GN=Rab5c PE=1 SV=2	P35278	Rab5c	23 kDa	1
| organism=Plasmodium_berghei_ANKA | product=heat shock protein 60, putative | location=berg12:508279-510311(-) | length=579 | sequence_SO=chromosome | SO=protein_coding	PBANKA_121400		62 kDa	3
Aminoacyl tRNA synthase complex-interacting multifunctional protein 2 OS=Mus musculus OX=10090 GN=Aimp2 PE=1 SV=2	Q8R010	Aimp2	35 kDa
LanC-like protein 2 OS=Mus musculus OX=10090 GN=Lancl2 PE=1 SV=1	Q9JJK2	Lancl2	51 kDa	3
ATP-citrate synthase OS=Mus musculus OX=10090 GN=Acly PE=1 SV=1	Q91V92	Acly	120 kDa	1
Integrin alpha-M OS=Mus musculus OX=10090 GN=Itgam PE=1 SV=2	P05555	Itgam	127 kDa	1
Retinol-binding protein 4 OS=Mus musculus OX=10090 GN=Rbp4 PE=1 SV=2	Q00724	Rbp4	23 kDa	1
Polyadenylate-binding protein 1 OS=Mus musculus OX=10090 GN=Pabpc1 PE=1 SV=2	P29341	Pabpc1	71 kDa	0
| organism=Plasmodium_berghei_ANKA | product=26S proteasome regulatory subunit S14, putative | location=berg04:388725-389636(+) | length=303 | sequence_SO=chromosome | SO=protein_coding	PBANKA_041030		36 kDa	1
| organism=Plasmodium_berghei_ANKA | product=exported protein 2, putative (EXP2) | location=berg13:1365233-1366261(-) | length=269 | sequence_SO=chromosome | SO=protein_coding	PBANKA_133430		32 kDa	2
NmrA-like family domain-containing protein 1 OS=Mus musculus OX=10090 GN=Nmral1 PE=1 SV=1	Q8K2T1	Nmral1	34 kDa	1
Sorting nexin-1 OS=Mus musculus OX=10090 GN=Snx1 PE=1 SV=1	Q9WV80	Snx1	59 kDa	1
| organism=Plasmodium_berghei_ANKA | product=malate dehydrogenase, putative (MDH) | location=berg11:643252-644193(+) | length=313 | sequence_SO=chromosome | SO=protein_coding	PBANKA_111770		34 kDa	1
Calponin-2 OS=Mus musculus OX=10090 GN=Cnn2 PE=1 SV=1	Q08093	Cnn2	33 kDa	2
Napsin-A OS=Mus musculus OX=10090 GN=Napsa PE=1 SV=1	O09043	Napsa	46 kDa	2
MLV-related proviral Env polyprotein OS=Mus musculus OX=10090 PE=1 SV=3	P10404		70 kDa	1
| organism=Plasmodium_berghei_ANKA | product=early transcripted membrane protein (SEP3) | location=berg05:52093-52557(+) | length=154 | sequence_SO=chromosome | SO=protein_coding	PBANKA_050110		17 kDa	1
| organism=Plasmodium_berghei_ANKA | product=40S ribosomal protein S15/S19, putative | location=berg14:602251-603341(+) | length=145 | sequence_SO=chromosome | SO=protein_coding	PBANKA_141630		17 kDa	2
| organism=Plasmodium_berghei_ANKA | product=macrophage migration inhibitory factor (MIF) | location=berg14:1640284-1640782(+) | length=116 | sequence_SO=chromosome | SO=protein_coding	PBANKA_144400		13 kDa	2
Platelet-activating factor acetylhydrolase IB subunit beta OS=Mus musculus OX=10090 GN=Pafah1b2 PE=1 SV=2	Q61206	Pafah1b2	26 kDa	1
Glycolipid transfer protein domain-containing protein 2 OS=Mus musculus OX=10090 GN=Gltpd2 PE=1 SV=1	Q8K0R6	Gltpd2	34 kDa	2
Out at first protein homolog OS=Mus musculus OX=10090 GN=Oaf PE=2 SV=1	Q8QZR4	Oaf	32 kDa	2
Chymotrypsin-like elastase family member 1 OS=Mus musculus OX=10090 GN=Cela1 PE=1 SV=1	Q91X79	Cela1	29 kDa	2
Ubiquitin-conjugating enzyme E2 variant 2 OS=Mus musculus OX=10090 GN=Ube2v2 PE=1 SV=4	Q9D2M8	Ube2v2	16 kDa	1
Leukocyte elastase inhibitor A OS=Mus musculus OX=10090 GN=Serpinb1a PE=1 SV=1	Q9D154	Serpinb1a	43 kDa	1
| organism=Plasmodium_berghei_ANKA | product=plasmepsin IV (PM4) | location=berg10:1366386-1367738(-) | length=450 | sequence_SO=chromosome | SO=protein_coding	PBANKA_103440		50 kDa	2
| organism=Plasmodium_berghei_ANKA | product=polyadenylate-binding protein, putative (PABP) | location=berg14:1437456-1439960(+) | length=834 | sequence_SO=chromosome | SO=protein_coding	PBANKA_143920		93 kDa	1
60S ribosomal protein L27 OS=Mus musculus OX=10090 GN=Rpl27 PE=1 SV=2	P61358	Rpl27	16 kDa
Beta-adducin OS=Mus musculus OX=10090 GN=Add2 PE=1 SV=4	Q9QYB8	Add2	81 kDa	1
| organism=Plasmodium_berghei_ANKA | product=60S acidic ribosomal protein P2, putative | location=berg04:293777-294112(+) | length=111 | sequence_SO=chromosome | SO=protein_coding	PBANKA_040770		12 kDa	2
Elongation factor 1-beta OS=Mus musculus OX=10090 GN=Eef1b PE=1 SV=5	O70251	Eef1b	25 kDa	0
Aspartyl aminopeptidase OS=Mus musculus OX=10090 GN=Dnpep PE=1 SV=2	Q9Z2W0	Dnpep	52 kDa	1
Protein CTLA-2-alpha OS=Mus musculus OX=10090 GN=Ctla2a PE=2 SV=2	P12399	Ctla2a	16 kDa	2
Uteroglobin OS=Mus musculus OX=10090 GN=Scgb1a1 PE=1 SV=1	Q06318	Scgb1a1	11 kDa	1
| organism=Plasmodium_berghei_ANKA | product=histone H2B variant, putative (H2B.Z) | location=berg14:773045-773416(-) | length=123 | sequence_SO=chromosome | SO=protein_coding	PBANKA_142060 (+1)		14 kDa	4
| organism=Plasmodium_berghei_ANKA | product=nucleosome assembly protein 1, putative (NAPL) | location=berg06:115005-116683(-) | length=345 | sequence_SO=chromosome | SO=protein_coding	PBANKA_060270 (+1)		40 kDa	2
GTP-binding protein SAR1b OS=Mus musculus OX=10090 GN=Sar1b PE=1 SV=1	Q9CQC9	Sar1b	22 kDa
Signal transducer and activator of transcription 3 OS=Mus musculus OX=10090 GN=Stat3 PE=1 SV=2	P42227	Stat3	88 kDa
COP9 signalosome complex subunit 3 OS=Mus musculus OX=10090 GN=Cops3 PE=1 SV=3	O88543	Cops3	48 kDa	0
Protein VAC14 homolog OS=Mus musculus OX=10090 GN=Vac14 PE=1 SV=1	Q80WQ2	Vac14	88 kDa	2
Poly(rC)-binding protein 2 OS=Mus musculus OX=10090 GN=Pcbp2 PE=1 SV=1	Q61990	Pcbp2	38 kDa
Transketolase OS=Mus musculus OX=10090 GN=Tkt PE=1 SV=1	P40142	Tkt	68 kDa	2
Glutathione S-transferase Mu 5 OS=Mus musculus OX=10090 GN=Gstm5 PE=1 SV=1	P48774	Gstm5	27 kDa
Protein kinase C and casein kinase substrate in neurons protein 2 OS=Mus musculus OX=10090 GN=Pacsin2 PE=1 SV=1	Q9WVE8	Pacsin2	56 kDa	1
| organism=Plasmodium_berghei_ANKA | product=leucine--tRNA ligase, putative | location=berg11:778894-782643(+) | length=1249 | sequence_SO=chromosome | SO=protein_coding	PBANKA_112170		147 kDa	1
| organism=Plasmodium_berghei_ANKA | product=60S ribosomal protein L23, putative | location=berg13:1815889-1816790(+) | length=139 | sequence_SO=chromosome | SO=protein_coding	PBANKA_134670 (+1)		15 kDa	2
| organism=Plasmodium_berghei_ANKA | product=40S ribosomal protein S10, putative | location=berg06:677086-678002(+) | length=137 | sequence_SO=chromosome | SO=protein_coding	PBANKA_061720 (+1)		17 kDa	2
| organism=Plasmodium_berghei_ANKA | product=receptor for activated C kinase, putative (RACK) | location=berg07:148240-149782(+) | length=322 | sequence_SO=chromosome | SO=protein_coding	PBANKA_070390		36 kDa	2
Eukaryotic peptide chain release factor GTP-binding subunit ERF3A OS=Mus musculus OX=10090 GN=Gspt1 PE=1 SV=2	Q8R050	Gspt1	69 kDa	1
| organism=Plasmodium_falciparum_3D7 | product=phosphoenolpyruvate carboxylase, putative (PEPC) | location=Pf3D7_14_v3:1036137-1039583(-) | length=1148 | sequence_SO=chromosome | SO=protein_coding	PF3D7_1426700		134 kDa
Calreticulin OS=Mus musculus OX=10090 GN=Calr PE=1 SV=1	P14211	Calr	48 kDa	2
| organism=Plasmodium_falciparum_3D7 | product=60S ribosomal protein L11a, putative | location=Pf3D7_07_v3:858742-859492(-) | length=173 | sequence_SO=chromosome | SO=protein_coding	PF3D7_0719600		20 kDa	2
Formimidoyltransferase-cyclodeaminase OS=Mus musculus OX=10090 GN=Ftcd PE=1 SV=1	Q91XD4	Ftcd	59 kDa	2
V-type proton ATPase subunit C 1 OS=Mus musculus OX=10090 GN=Atp6v1c1 PE=1 SV=4	Q9Z1G3	Atp6v1c1	44 kDa
| organism=Plasmodium_berghei_ANKA | product=flap endonuclease 1, putative | location=berg10:264300-265739(-) | length=479 | sequence_SO=chromosome | SO=protein_coding	PBANKA_100610		55 kDa	1
| organism=Plasmodium_berghei_ANKA | product=conserved Plasmodium protein, unknown function | location=berg08:186023-189706(+) | length=1227 | sequence_SO=chromosome | SO=protein_coding	PBANKA_080360		144 kDa	2
| organism=Plasmodium_falciparum_3D7 | product=conserved Plasmodium protein, unknown function | location=Pf3D7_05_v3:367022-376426(+) | length=3134 | sequence_SO=chromosome | SO=protein_coding	PF3D7_0508900-DECOY		?	1
Anthrax toxin receptor 1 OS=Mus musculus OX=10090 GN=Antxr1 PE=1 SV=2	Q9CZ52	Antxr1	62 kDa	1
Protein S100-A6 OS=Mus musculus OX=10090 GN=S100a6 PE=1 SV=3	P14069	S100a6	10 kDa	1
Phosphoribosyl pyrophosphate synthase-associated protein 1 OS=Mus musculus OX=10090 GN=Prpsap1 PE=1 SV=1	Q9D0M1	Prpsap1	39 kDa	1
60S ribosomal protein L18a OS=Mus musculus OX=10090 GN=Rpl18a PE=1 SV=1	P62717	Rpl18a	21 kDa	1
| organism=Plasmodium_berghei_ANKA | product=lysophospholipase, putative | location=berg12:754826-755959(-) | length=377 | sequence_SO=chromosome | SO=protein_coding	PBANKA_122030		43 kDa	3
| organism=Plasmodium_falciparum_3D7 | product=tRNA 1-methyladenosine methyltransferase subunit, putative | location=Pf3D7_09_v3:563329-565179(-) | length=616 | sequence_SO=chromosome | SO=protein_coding	PF3D7_0912800-DECOY		?	1
40S ribosomal protein S14 OS=Mus musculus OX=10090 GN=Rps14 PE=1 SV=3	P62264	Rps14	16 kDa	2
RuvB-like 2 OS=Mus musculus OX=10090 GN=Ruvbl2 PE=1 SV=3	Q9WTM5	Ruvbl2	51 kDa
Ig heavy chain V region RF OS=Mus musculus OX=10090 PE=1 SV=1	P18524		13 kDa	2
Proteasome activator complex subunit 3 OS=Mus musculus OX=10090 GN=Psme3 PE=1 SV=1	P61290	Psme3	30 kDa	1
LIM and senescent cell antigen-like-containing domain protein 1 OS=Mus musculus OX=10090 GN=Lims1 PE=1 SV=3	Q99JW4	Lims1	37 kDa	2
| organism=Plasmodium_berghei_ANKA | product=RNAse L inhibitor protein, putative | location=berg11:1625769-1627817(-) | length=619 | sequence_SO=chromosome | SO=protein_coding	PBANKA_114410 (+1)		70 kDa	3
Cluster of | organism=Plasmodium_berghei_ANKA | product=glycerol kinase, putative | location=berg13:2431187-2432692(+) | length=501 | sequence_SO=chromosome | SO=protein_coding (PBANKA_136430)	PBANKA_136430 [2]		57 kDa	2
Cluster of Ig lambda-1 chain V region OS=Mus musculus OX=10090 PE=1 SV=2 (P01723)	P01723 [3]		12 kDa	2
Cluster of Glutathione S-transferase Mu 1 OS=Mus musculus OX=10090 GN=Gstm1 PE=1 SV=2 (P10649)	P10649 [2]	Gstm1	26 kDa	2
Cluster of | organism=Plasmodium_berghei_ANKA | product=histidine--tRNA ligase, putative | location=berg13:401165-404371(-) | length=1068 | sequence_SO=chromosome | SO=protein_coding (PBANKA_130890)	PBANKA_130890 [2]		125 kDa	1
Cluster of Guanine nucleotide-binding protein G(i) subunit alpha-2 OS=Mus musculus OX=10090 GN=Gnai2 PE=1 SV=5 (P08752)	P08752 [3]	Gnai2	40 kDa
Cluster of | organism=Plasmodium_berghei_ANKA | product=RNA-binding protein musashi, putative (HoMu) | location=berg08:705882-706916(-) | length=344 | sequence_SO=chromosome | SO=protein_coding (PBANKA_081770)	PBANKA_081770 [2]		40 kDa	2
Alpha-aminoadipic semialdehyde dehydrogenase OS=Mus musculus OX=10090 GN=Aldh7a1 PE=1 SV=4	Q9DBF1	Aldh7a1	59 kDa	3
Cytoplasmic FMR1-interacting protein 1 OS=Mus musculus OX=10090 GN=Cyfip1 PE=1 SV=1	Q7TMB8	Cyfip1	145 kDa
Signal recognition particle subunit SRP68 OS=Mus musculus OX=10090 GN=Srp68 PE=1 SV=2	Q8BMA6	Srp68	71 kDa
| organism=Plasmodium_berghei_ANKA | product=vacuolar ATP synthase subunit g, putative | location=berg13:1501465-1502130(-) | length=121 | sequence_SO=chromosome | SO=protein_coding	PBANKA_133840		14 kDa
Oxygen-dependent coproporphyrinogen-III oxidase, mitochondrial OS=Mus musculus OX=10090 GN=Cpox PE=1 SV=2	P36552	Cpox	50 kDa
Collagen alpha-1(VI) chain OS=Mus musculus OX=10090 GN=Col6a1 PE=1 SV=1	Q04857	Col6a1	108 kDa
Protein-L-isoaspartate(D-aspartate) O-methyltransferase OS=Mus musculus OX=10090 GN=Pcmt1 PE=1 SV=3	P23506	Pcmt1	25 kDa
60S ribosomal protein L31 OS=Mus musculus OX=10090 GN=Rpl31 PE=1 SV=1	P62900	Rpl31	14 kDa
| organism=Plasmodium_berghei_ANKA | product=protein transport protein Sec31, putative (SEC31) | location=berg03:381422-385971(-) | length=1388 | sequence_SO=chromosome | SO=protein_coding	PBANKA_031100		157 kDa	3
Lysosomal alpha-mannosidase OS=Mus musculus OX=10090 GN=Man2b1 PE=1 SV=4	O09159	Man2b1	115 kDa
| organism=Plasmodium_berghei_ANKA | product=acyl-CoA synthetase, putative | location=berg14:1997540-1999804(+) | length=754 | sequence_SO=chromosome | SO=protein_coding	PBANKA_145330		87 kDa	1
Galectin-3-binding protein OS=Mus musculus OX=10090 GN=Lgals3bp PE=1 SV=1	Q07797	Lgals3bp	64 kDa	2
DnaJ homolog subfamily B member 4 OS=Mus musculus OX=10090 GN=Dnajb4 PE=1 SV=1	Q9D832	Dnajb4	38 kDa
| organism=Plasmodium_berghei_ANKA | product=conserved Plasmodium protein, unknown function | location=berg10:901015-902427(-) | length=470 | sequence_SO=chromosome | SO=protein_coding	PBANKA_102350		55 kDa	1
Guanine nucleotide-binding protein G(I)/G(S)/G(T) subunit beta-1 OS=Mus musculus OX=10090 GN=Gnb1 PE=1 SV=3	P62874 (+1)	Gnb1	37 kDa	1
40S ribosomal protein S24 OS=Mus musculus OX=10090 GN=Rps24 PE=1 SV=1	P62849	Rps24	15 kDa	1
Tubulin--tyrosine ligase-like protein 12 OS=Mus musculus OX=10090 GN=Ttll12 PE=1 SV=1	Q3UDE2	Ttll12	74 kDa	1
Coatomer subunit alpha OS=Mus musculus OX=10090 GN=Copa PE=1 SV=2	Q8CIE6	Copa	138 kDa
Deoxyribose-phosphate aldolase OS=Mus musculus OX=10090 GN=Dera PE=1 SV=1	Q91YP3	Dera	35 kDa	1
Chloride intracellular channel protein 4 OS=Mus musculus OX=10090 GN=Clic4 PE=1 SV=3	Q9QYB1	Clic4	29 kDa	1
EGF-containing fibulin-like extracellular matrix protein 2 OS=Mus musculus OX=10090 GN=Efemp2 PE=1 SV=1	Q9WVJ9	Efemp2	49 kDa	2
Cytoplasmic aconitate hydratase OS=Mus musculus OX=10090 GN=Aco1 PE=1 SV=3	P28271	Aco1	98 kDa	2
Synaptobrevin homolog YKT6 OS=Mus musculus OX=10090 GN=Ykt6 PE=1 SV=1	Q9CQW1	Ykt6	22 kDa	1
| organism=Plasmodium_berghei_ANKA | product=HVA22-like protein, putative | location=berg11:1291846-1292307(-) | length=153 | sequence_SO=chromosome | SO=protein_coding	PBANKA_113500		18 kDa	2
Methanethiol oxidase OS=Mus musculus OX=10090 GN=Selenbp1 PE=1 SV=2	P17563 (+1)	Selenbp1	53 kDa	2
| organism=Plasmodium_berghei_ANKA | product=tubulin gamma chain, putative | location=berg12:993322-994680(-) | length=452 | sequence_SO=chromosome | SO=protein_coding	PBANKA_122660 (+1)		52 kDa	2
Hypoxia up-regulated protein 1 OS=Mus musculus OX=10090 GN=Hyou1 PE=1 SV=1	Q9JKR6	Hyou1	111 kDa
| organism=Plasmodium_berghei_ANKA | product=60S ribosomal protein L38e, putative | location=berg09:714800-715045(+) | length=81 | sequence_SO=chromosome | SO=protein_coding	PBANKA_091810		10 kDa	2
60S ribosomal protein L34 OS=Mus musculus OX=10090 GN=Rpl34 PE=1 SV=2	Q9D1R9	Rpl34	13 kDa	1
Low molecular weight phosphotyrosine protein phosphatase OS=Mus musculus OX=10090 GN=Acp1 PE=1 SV=3	Q9D358	Acp1	18 kDa	1
40S ribosomal protein S7 OS=Mus musculus OX=10090 GN=Rps7 PE=2 SV=1	P62082	Rps7	22 kDa	1
Enoyl-CoA delta isomerase 1, mitochondrial OS=Mus musculus OX=10090 GN=Eci1 PE=1 SV=2	P42125	Eci1	32 kDa	2
Rabankyrin-5 OS=Mus musculus OX=10090 GN=Ankfy1 PE=1 SV=2	Q810B6	Ankfy1	129 kDa
Eukaryotic translation initiation factor 3 subunit G OS=Mus musculus OX=10090 GN=Eif3g PE=1 SV=2	Q9Z1D1	Eif3g	36 kDa
| organism=Plasmodium_berghei_ANKA | product=armadillo repeat protein PF16 (PF16) | location=berg09:687619-689408(-) | length=509 | sequence_SO=chromosome | SO=protein_coding	PBANKA_091740		58 kDa	1
| organism=Plasmodium_berghei_ANKA | product=RNA-binding protein, putative | location=berg01:146949-149156(+) | length=735 | sequence_SO=chromosome | SO=protein_coding	PBANKA_010390		82 kDa	1
| organism=Plasmodium_berghei_ANKA | product=ribonucleotide reductase small subunit, putative | location=berg12:514310-515798(+) | length=335 | sequence_SO=chromosome | SO=protein_coding	PBANKA_121420		40 kDa
Adenylate kinase isoenzyme 1 OS=Mus musculus OX=10090 GN=Ak1 PE=1 SV=1	Q9R0Y5	Ak1	22 kDa	1
Tissue factor pathway inhibitor OS=Mus musculus OX=10090 GN=Tfpi PE=2 SV=1	O54819	Tfpi	35 kDa	0
Serine/threonine-protein phosphatase 6 regulatory subunit 1 OS=Mus musculus OX=10090 GN=Ppp6r1 PE=1 SV=1	Q7TSI3	Ppp6r1	95 kDa
Reticulon-3 OS=Mus musculus OX=10090 GN=Rtn3 PE=1 SV=2	Q9ES97	Rtn3	104 kDa	1
Barrier-to-autointegration factor OS=Mus musculus OX=10090 GN=Banf1 PE=1 SV=1	O54962	Banf1	10 kDa	2
Fibrinogen-like protein 1 OS=Mus musculus OX=10090 GN=Fgl1 PE=1 SV=2	Q71KU9	Fgl1	36 kDa	2
AP-1 complex subunit gamma-1 OS=Mus musculus OX=10090 GN=Ap1g1 PE=1 SV=3	P22892	Ap1g1	91 kDa	2
Basigin OS=Mus musculus OX=10090 GN=Bsg PE=1 SV=2	P18572	Bsg	42 kDa	2
| organism=Plasmodium_berghei_ANKA | product=aspartate--tRNA ligase, putative | location=berg02:378689-380749(+) | length=686 | sequence_SO=chromosome | SO=protein_coding	PBANKA_021020		81 kDa	0
| organism=Plasmodium_berghei_ANKA | product=FACT complex subunit SSRP1, putative (FACT-S) | location=berg13:255543-257024(+) | length=493 | sequence_SO=chromosome | SO=protein_coding	PBANKA_130530		57 kDa
Serine hydroxymethyltransferase, mitochondrial OS=Mus musculus OX=10090 GN=Shmt2 PE=1 SV=1	Q9CZN7	Shmt2	56 kDa	0
| organism=Plasmodium_berghei_ANKA | product=heat shock protein, putative | location=berg09:1412500-1414161(+) | length=553 | sequence_SO=chromosome | SO=protein_coding	PBANKA_093830		63 kDa	0
Vascular non-inflammatory molecule 3 OS=Mus musculus OX=10090 GN=Vnn3 PE=1 SV=3	Q9QZ25	Vnn3	56 kDa	0
| organism=Plasmodium_berghei_ANKA | product=phenylalanyl-tRNA synthetase beta chain, putative | location=berg09:1587972-1590223(+) | length=625 | sequence_SO=chromosome | SO=protein_coding	PBANKA_094290		73 kDa	2
| organism=Plasmodium_berghei_ANKA | product=40S ribosomal protein S11, putative | location=berg08:357334-358497(-) | length=161 | sequence_SO=chromosome | SO=protein_coding	PBANKA_080760 (+1)		19 kDa	2
Angiopoietin-related protein 3 OS=Mus musculus OX=10090 GN=Angptl3 PE=1 SV=1	Q9R182	Angptl3	53 kDa	2
Leukocyte surface antigen CD47 OS=Mus musculus OX=10090 GN=Cd47 PE=1 SV=2	Q61735	Cd47	33 kDa	2
| organism=Plasmodium_berghei_ANKA | product=eukaryotic translation initiation factor 2, beta, putative | location=berg12:321693-322458(-) | length=224 | sequence_SO=chromosome | SO=protein_coding	PBANKA_120900		25 kDa	1
Epsin-1 OS=Mus musculus OX=10090 GN=Epn1 PE=1 SV=3	Q80VP1	Epn1	60 kDa	2
| organism=Plasmodium_berghei_ANKA | product=Sec24 subunit, putative | location=berg11:1386906-1390593(+) | length=942 | sequence_SO=chromosome | SO=protein_coding	PBANKA_113720		106 kDa	1
| organism=Plasmodium_berghei_ANKA | product=adenosine deaminase, putative (ADA) | location=berg05:523492-524583(+) | length=363 | sequence_SO=chromosome | SO=protein_coding	PBANKA_051360-DECOY		?	0
Aldo-keto reductase family 1 member B1 OS=Mus musculus OX=10090 GN=Akr1b1 PE=1 SV=3	P45376	Akr1b1	36 kDa	1
| organism=Plasmodium_berghei_ANKA | product=ABC transporter, putative | location=berg04:51991-55815(+) | length=1274 | sequence_SO=chromosome | SO=protein_coding	PBANKA_040120		149 kDa	1
26S proteasome non-ATPase regulatory subunit 8 OS=Mus musculus OX=10090 GN=Psmd8 PE=1 SV=2	Q9CX56	Psmd8	40 kDa	1
Tyrosine--tRNA ligase, cytoplasmic OS=Mus musculus OX=10090 GN=Yars PE=1 SV=3	Q91WQ3	Yars	59 kDa
40S ribosomal protein S25 OS=Mus musculus OX=10090 GN=Rps25 PE=1 SV=1	P62852	Rps25	14 kDa	0
| organism=Plasmodium_berghei_ANKA | product=conserved Plasmodium protein, unknown function | location=berg07:284077-287517(+) | length=1146 | sequence_SO=chromosome | SO=protein_coding	PBANKA_070770		132 kDa	2
60S ribosomal protein L35 OS=Mus musculus OX=10090 GN=Rpl35 PE=1 SV=1	Q6ZWV7	Rpl35	15 kDa	0
Ig heavy chain V region MOPC 47A OS=Mus musculus OX=10090 PE=1 SV=1	P01786		13 kDa	2
40S ribosomal protein S23 OS=Mus musculus OX=10090 GN=Rps23 PE=1 SV=3	P62267	Rps23	16 kDa	1
Serine/threonine-protein kinase PAK 2 OS=Mus musculus OX=10090 GN=Pak2 PE=1 SV=1	Q8CIN4	Pak2	58 kDa	0
Geranylgeranyl pyrophosphate synthase OS=Mus musculus OX=10090 GN=Ggps1 PE=1 SV=1	Q9WTN0	Ggps1	35 kDa	1
| organism=Plasmodium_berghei_ANKA | product=chromosome assembly factor 1, putative | location=berg11:69373-72126(+) | length=917 | sequence_SO=chromosome | SO=protein_coding	PBANKA_110160		107 kDa	0
DENN domain-containing protein 4C OS=Mus musculus OX=10090 GN=Dennd4c PE=1 SV=1	sp|A6H8H2|DEN4C_MOUSE-DECOY		?	2
Serine/threonine-protein kinase OSR1 OS=Mus musculus OX=10090 GN=Oxsr1 PE=1 SV=1	Q6P9R2	Oxsr1	58 kDa	1
Cluster of | organism=Plasmodium_berghei_ANKA | product=glucose-6-phosphate dehydrogenase-6- phosphogluconolactonase (G6PD-6PGL) | location=berg13:717636-720488(-) | length=950 | sequence_SO=chromosome | SO=protein_coding (PBANKA_131750)	PBANKA_131750 [2]		110 kDa	2
Cluster of Sodium/potassium-transporting ATPase subunit alpha-2 OS=Mus musculus OX=10090 GN=Atp1a2 PE=1 SV=1 (Q6PIE5)	Q6PIE5 [3]	Atp1a2	112 kDa
Cluster of Dynein light chain 1, cytoplasmic OS=Mus musculus OX=10090 GN=Dynll1 PE=1 SV=1 (P63168)	P63168 [3]	Dynll1	10 kDa
Cluster of Septin-8 OS=Mus musculus OX=10090 GN=Sept8 PE=1 SV=4 (Q8CHH9)	Q8CHH9 [2]	2020-09-08	50 kDa
| organism=Plasmodium_berghei_ANKA | product=perforin like protein 2 (PPLP2) | location=berg14:1164534-1167533(+) | length=999 | sequence_SO=chromosome | SO=protein_coding	PBANKA_143240		114 kDa
| organism=Plasmodium_berghei_ANKA | product=rhoptry protein, putative | location=berg01:13433-15372(+) | length=613 | sequence_SO=chromosome | SO=protein_coding	PBANKA_010040		72 kDa	2
Eukaryotic translation initiation factor 3 subunit K OS=Mus musculus OX=10090 GN=Eif3k PE=1 SV=1	Q9DBZ5	Eif3k	25 kDa
Coatomer subunit delta OS=Mus musculus OX=10090 GN=Arcn1 PE=1 SV=2	Q5XJY5	Arcn1	57 kDa
Aminoacyl tRNA synthase complex-interacting multifunctional protein 1 OS=Mus musculus OX=10090 GN=Aimp1 PE=1 SV=2	P31230	Aimp1	34 kDa
| organism=Plasmodium_berghei_ANKA | product=actin-depolymerizing factor 2 (ADF2) | location=berg11:1400911-1401449(-) | length=143 | sequence_SO=chromosome | SO=protein_coding	PBANKA_113750		17 kDa
Tyrosine-protein kinase CSK OS=Mus musculus OX=10090 GN=Csk PE=1 SV=2	P41241	Csk	51 kDa
Coatomer subunit zeta-1 OS=Mus musculus OX=10090 GN=Copz1 PE=1 SV=1	P61924	Copz1	20 kDa
60S acidic ribosomal protein P2 OS=Mus musculus OX=10090 GN=Rplp2 PE=1 SV=3	P99027	Rplp2	12 kDa
| organism=Plasmodium_berghei_ANKA | product=phosphoglucomutase, putative | location=berg12:374296-376077(-) | length=593 | sequence_SO=chromosome | SO=protein_coding	PBANKA_121090		68 kDa
Eukaryotic translation initiation factor 5B OS=Mus musculus OX=10090 GN=Eif5b PE=1 SV=2	Q05D44	Eif5b	138 kDa
Eukaryotic translation initiation factor 3 subunit I OS=Mus musculus OX=10090 GN=Eif3i PE=1 SV=1	Q9QZD9	Eif3i	36 kDa
| organism=Plasmodium_berghei_ANKA | product=myosin A (MyoA) | location=berg13:2088223-2090918(+) | length=817 | sequence_SO=chromosome | SO=protein_coding	PBANKA_135570		92 kDa	2
| organism=Plasmodium_berghei_ANKA | product=conserved Plasmodium protein, unknown function | location=berg14:659922-664718(+) | length=1052 | sequence_SO=chromosome | SO=protein_coding	PBANKA_141790		124 kDa
NAD(P) transhydrogenase, mitochondrial OS=Mus musculus OX=10090 GN=Nnt PE=1 SV=2	Q61941	Nnt	114 kDa
Alpha-1,6-mannosyl-glycoprotein 2-beta-N-acetylglucosaminyltransferase OS=Mus musculus OX=10090 GN=Mgat2 PE=1 SV=1	Q921V5	Mgat2	51 kDa
| organism=Plasmodium_berghei_ANKA | product=mitogen-activated protein kinase 2 (MAP2) | location=berg09:1260721-1262292(+) | length=523 | sequence_SO=chromosome | SO=protein_coding	PBANKA_093370		61 kDa
Fatty acid-binding protein, adipocyte OS=Mus musculus OX=10090 GN=Fabp4 PE=1 SV=3	P04117	Fabp4	15 kDa
Macrophage-capping protein OS=Mus musculus OX=10090 GN=Capg PE=1 SV=2	P24452	Capg	39 kDa
| organism=Plasmodium_berghei_ANKA | product=rhoptry-associated leucine zipper-like protein 1, putative (RALP1) | location=berg06:752212-753846(+) | length=544 | sequence_SO=chromosome | SO=protein_coding	PBANKA_061970		63 kDa	2
Dynactin subunit 1 OS=Mus musculus OX=10090 GN=Dctn1 PE=1 SV=3	O08788	Dctn1	142 kDa
| organism=Plasmodium_berghei_ANKA | product=aspartyl protease, putative | location=berg14:1847885-1850196(-) | length=577 | sequence_SO=chromosome | SO=protein_coding	PBANKA_144900		65 kDa
| organism=Plasmodium_berghei_ANKA | product=60S ribosomal protein L13-2, putative | location=berg14:859336-860083(-) | length=215 | sequence_SO=chromosome | SO=protein_coding	PBANKA_142350		25 kDa	2
Mitochondrial fission 1 protein OS=Mus musculus OX=10090 GN=Fis1 PE=1 SV=1	Q9CQ92	Fis1	17 kDa
Tyrosine-protein kinase BTK OS=Mus musculus OX=10090 GN=Btk PE=1 SV=4	P35991	Btk	76 kDa
Collagen alpha-2(VI) chain OS=Mus musculus OX=10090 GN=Col6a2 PE=1 SV=3	Q02788	Col6a2	110 kDa
SPARC-like protein 1 OS=Mus musculus OX=10090 GN=Sparcl1 PE=1 SV=3	P70663	Sparcl1	72 kDa	2
| organism=Plasmodium_berghei_ANKA | product=serine repeat antigen 2 (SERA2) | location=berg03:165144-168975(-) | length=1122 | sequence_SO=chromosome | SO=protein_coding	PBANKA_030500		124 kDa	2
60S ribosomal protein L38 OS=Mus musculus OX=10090 GN=Rpl38 PE=1 SV=3	Q9JJI8	Rpl38	8 kDa
| organism=Plasmodium_berghei_ANKA | product=merozoite surface protein 7 (MSP7) | location=berg13:1881543-1882550(-) | length=335 | sequence_SO=chromosome | SO=protein_coding	PBANKA_134910		38 kDa	2
Reticulon-4 OS=Mus musculus OX=10090 GN=Rtn4 PE=1 SV=2	Q99P72	Rtn4	127 kDa
Chitinase-like protein 3 OS=Mus musculus OX=10090 GN=Chil3 PE=1 SV=2	O35744	Chil3	44 kDa
| organism=Plasmodium_berghei_ANKA | product=DNA primase large subunit, putative | location=berg08:525581-527380(-) | length=537 | sequence_SO=chromosome | SO=protein_coding	PBANKA_081200		64 kDa
| organism=Plasmodium_berghei_ANKA | product=subtilisin-like protease 2 (SUB2) | location=berg09:463266-467094(-) | length=1230 | sequence_SO=chromosome | SO=protein_coding	PBANKA_091170		141 kDa
| organism=Plasmodium_berghei_ANKA | product=transport protein Sec13, putative | location=berg14:1686981-1689130(+) | length=687 | sequence_SO=chromosome | SO=protein_coding	PBANKA_144540		77 kDa	2
Oxysterol-binding protein 1 OS=Mus musculus OX=10090 GN=Osbp PE=1 SV=3	Q3B7Z2	Osbp	89 kDa
Endophilin-B1 OS=Mus musculus OX=10090 GN=Sh3glb1 PE=1 SV=1	Q9JK48	Sh3glb1	41 kDa
Ubiquitin carboxyl-terminal hydrolase 15 OS=Mus musculus OX=10090 GN=Usp15 PE=1 SV=1	Q8R5H1	Usp15	112 kDa
| organism=Plasmodium_berghei_ANKA | product=conserved Plasmodium protein, unknown function | location=berg08:880858-884123(+) | length=797 | sequence_SO=chromosome | SO=protein_coding	PBANKA_082290		94 kDa
60S ribosomal protein L36 OS=Mus musculus OX=10090 GN=Rpl36 PE=1 SV=2	P47964	Rpl36	12 kDa
Hsc70-interacting protein OS=Mus musculus OX=10090 GN=St13 PE=1 SV=1	Q99L47	St13	42 kDa
Arylsulfatase G OS=Mus musculus OX=10090 GN=Arsg PE=2 SV=1	Q3TYD4	Arsg	57 kDa	2
Eukaryotic translation initiation factor 4E OS=Mus musculus OX=10090 GN=Eif4e PE=1 SV=1	P63073	Eif4e	25 kDa
Plasminogen activator inhibitor 2, macrophage OS=Mus musculus OX=10090 GN=Serpinb2 PE=1 SV=1	P12388	Serpinb2	46 kDa
Methylthioribose-1-phosphate isomerase OS=Mus musculus OX=10090 GN=Mri1 PE=1 SV=1	Q9CQT1	Mri1	39 kDa
Protocadherin-12 OS=Mus musculus OX=10090 GN=Pcdh12 PE=1 SV=2	O55134	Pcdh12	129 kDa
N-alpha-acetyltransferase 15, NatA auxiliary subunit OS=Mus musculus OX=10090 GN=Naa15 PE=1 SV=1	Q80UM3	Naa15	101 kDa
| organism=Plasmodium_berghei_ANKA | product=40S ribosomal protein S20e, putative | location=berg12:75865-76753(-) | length=118 | sequence_SO=chromosome | SO=protein_coding	PBANKA_120190		14 kDa	2
2'-5'-oligoadenylate synthase 3 OS=Mus musculus OX=10090 GN=Oas3 PE=1 SV=1	Q8VI93	Oas3	126 kDa
Cluster of Mitogen-activated protein kinase 1 OS=Mus musculus OX=10090 GN=Mapk1 PE=1 SV=3 (P63085)	P63085 [3]	Mapk1	41 kDa

## Sheet: Plasmodium specific proteins
MS/MS View:1222 Proteins in 1016 Clusters<BR>With 6 Decoys and 9 Filtered Out	Accession Number	Molecular Weight	Pb-PfCHT1; Total Spectral count
Cluster of | organism=Plasmodium_berghei_ANKA | product=heat shock protein, putative (HSP70) | location=berg07:420169-422250(-) | length=693 | sequence_SO=chromosome | SO=protein_coding (PBANKA_071190)	PBANKA_071190 [5]	75 kDa	71
| organism=Plasmodium_berghei_ANKA | product=heat shock protein 90, putative (HSP90) | location=berg08:268690-271847(+) | length=720 | sequence_SO=chromosome | SO=protein_coding	PBANKA_080570	83 kDa	65
| organism=Plasmodium_berghei_ANKA | product=merozoite surface protein 1 (MSP1) | location=berg08:1161322-1166697(+) | length=1791 | sequence_SO=chromosome | SO=protein_coding	PBANKA_083100	199 kDa	59
| organism=Plasmodium_berghei_ANKA | product=enolase, putative (ENO) | location=berg12:517612-519171(+) | length=446 | sequence_SO=chromosome | SO=protein_coding	PBANKA_121430	49 kDa	52
| organism=Plasmodium_berghei_ANKA | product=elongation factor 1 alpha (EF-1alpha) | location=berg11:1236969-1238300(+) | length=443 | sequence_SO=chromosome | SO=protein_coding	PBANKA_113340	49 kDa	50
| organism=Plasmodium_berghei_ANKA | product=glyceraldehyde-3-phosphate dehydrogenase, putative | location=berg13:1022627-1023877(+) | length=337 | sequence_SO=chromosome | SO=protein_coding	PBANKA_132640	37 kDa	49
| organism=Plasmodium_berghei_ANKA | product=osmiophilic body protein (G377) | location=berg14:2327865-2335685(-) | length=2606 | sequence_SO=chromosome | SO=protein_coding	PBANKA_146300	309 kDa	48
| organism=Plasmodium_berghei_ANKA | product=tubulin beta chain, putative | location=berg12:255348-257505(-) | length=445 | sequence_SO=chromosome | SO=protein_coding	PBANKA_120690	50 kDa	40
Cluster of | organism=Plasmodium_berghei_ANKA | product=karyopherin beta, putative | location=berg12:1467775-1471155(+) | length=1126 | sequence_SO=chromosome | SO=protein_coding (PBANKA_123880)	PBANKA_123880 [2]	128 kDa	30
| organism=Plasmodium_berghei_ANKA | product=merozoite surface protein 9, putative | location=berg14:1598402-1600258(-) | length=618 | sequence_SO=chromosome | SO=protein_coding	PBANKA_144330	70 kDa	28
Cluster of | organism=Plasmodium_berghei_ANKA | product=conserved Plasmodium protein, unknown function | location=berg11:1407746-1415866(+) | length=2605 | sequence_SO=chromosome | SO=protein_coding (PBANKA_113780)	PBANKA_113780 [2]	291 kDa	27
| organism=Plasmodium_berghei_ANKA | product=elongation factor 2, putative | location=berg13:605922-608420(+) | length=832 | sequence_SO=chromosome | SO=protein_coding	PBANKA_131480	93 kDa	22
| organism=Plasmodium_berghei_ANKA | product=high molecular weight rhoptry protein 2, putative (RhopH2) | location=berg08:1134874-1139786(+) | length=1354 | sequence_SO=chromosome | SO=protein_coding	PBANKA_083020	160 kDa	21
Cluster of | organism=Plasmodium_berghei_ANKA | product=endoplasmin, putative (GRP94) | location=berg14:1351801-1354227(-) | length=808 | sequence_SO=chromosome | SO=protein_coding (PBANKA_143730)	PBANKA_143730 [2]	93 kDa	19
Cluster of | organism=Plasmodium_berghei_ANKA | product=alpha tubulin 2 | location=berg05:852804-854485(+) | length=450 | sequence_SO=chromosome | SO=protein_coding (PBANKA_052270)	PBANKA_052270 [3]	50 kDa	18
Cluster of | organism=Plasmodium_berghei_ANKA | product=ribonucleoside-diphosphate reductase, large subunit, putative | location=berg06:457843-460598(+) | length=847 | sequence_SO=chromosome | SO=protein_coding (PBANKA_061160)	PBANKA_061160 [2]	97 kDa	17
Cluster of | organism=Plasmodium_berghei_ANKA | product=TCP-1/cpn60 chaperonin family, putative | location=berg09:642849-644617(+) | length=543 | sequence_SO=chromosome | SO=protein_coding (PBANKA_091620)	PBANKA_091620 [2]	60 kDa	17
| organism=Plasmodium_berghei_ANKA | product=T-complex protein 1, putative | location=berg03:379327-381079(+) | length=543 | sequence_SO=chromosome | SO=protein_coding	PBANKA_031090	61 kDa	16
| organism=Plasmodium_berghei_ANKA | product=hexokinase, putative | location=berg11:833517-835001(+) | length=494 | sequence_SO=chromosome | SO=protein_coding	PBANKA_112290	55 kDa	16
| organism=Plasmodium_falciparum_3D7 | product=chitinase (CHT1) | location=Pf3D7_12_v3:2125435-2126571(+) | length=378 | sequence_SO=chromosome | SO=protein_coding	PF3D7_1252200	43 kDa	16
Cluster of | organism=Plasmodium_berghei_ANKA | product=t-complex protein 1 gamma subunit, putative | location=berg14:1642507-1644220(+) | length=542 | sequence_SO=chromosome | SO=protein_coding (PBANKA_144410)	PBANKA_144410 [2]	61 kDa	15
| organism=Plasmodium_berghei_ANKA | product=T-complex protein beta subunit, putative | location=berg04:200299-202076(-) | length=533 | sequence_SO=chromosome | SO=protein_coding	PBANKA_040520	59 kDa	13
| organism=Plasmodium_berghei_ANKA | product=elongation factor 1-gamma, putative | location=berg13:1972561-1974023(+) | length=403 | sequence_SO=chromosome | SO=protein_coding	PBANKA_135200	47 kDa	13
| organism=Plasmodium_berghei_ANKA | product=eukaryotic initiation factor 4a, putative (eIF4A) | location=berg13:1288733-1290314(+) | length=398 | sequence_SO=chromosome | SO=protein_coding	PBANKA_133190	45 kDa	13
| organism=Plasmodium_berghei_ANKA | product=14-3-3 protein, putative (14-3-3I) | location=berg07:446001-447492(-) | length=262 | sequence_SO=chromosome | SO=protein_coding	PBANKA_071260	30 kDa	13
| organism=Plasmodium_berghei_ANKA | product=RhopH3, putative | location=berg04:585978-589539(+) | length=908 | sequence_SO=chromosome | SO=protein_coding	PBANKA_041600	105 kDa	12
| organism=Plasmodium_berghei_ANKA | product=calcium-dependent protein kinase 4 (CDPK4) | location=berg06:580269-582030(+) | length=528 | sequence_SO=chromosome | SO=protein_coding	PBANKA_061520	61 kDa	11
| organism=Plasmodium_berghei_ANKA | product=TCP-1/cpn60 chaperonin, putative | location=berg11:1259022-1261413(+) | length=529 | sequence_SO=chromosome | SO=protein_coding	PBANKA_113410	58 kDa	11
| organism=Plasmodium_berghei_ANKA | product=heat shock protein 110, putative (HSP110c) | location=berg12:714324-716834(+) | length=836 | sequence_SO=chromosome | SO=protein_coding	PBANKA_121930	95 kDa	11
Cluster of | organism=Plasmodium_berghei_ANKA | product=pyruvate kinase, putative | location=berg11:921009-923265(+) | length=511 | sequence_SO=chromosome | SO=protein_coding (PBANKA_112560)	PBANKA_112560 [2]	56 kDa	11
| organism=Plasmodium_berghei_ANKA | product=phosphoglycerate mutase, putative (PGM1) | location=berg09:1071844-1072903(-) | length=250 | sequence_SO=chromosome | SO=protein_coding	PBANKA_092810	29 kDa	11
| organism=Plasmodium_berghei_ANKA | product=40S ribosomal protein S3, putative | location=berg13:1175944-1177217(+) | length=222 | sequence_SO=chromosome | SO=protein_coding	PBANKA_132930	25 kDa	11
| organism=Plasmodium_berghei_ANKA | product=Plasmodium exported protein, unknown function | location=berg12:1103822-1107252(+) | length=1095 | sequence_SO=chromosome | SO=protein_coding	PBANKA_122900	126 kDa	10
| organism=Plasmodium_berghei_ANKA | product=heat shock protein 70, putative | location=berg08:745208-747477(+) | length=651 | sequence_SO=chromosome | SO=protein_coding	PBANKA_081890	72 kDa	10
| organism=Plasmodium_berghei_ANKA | product=rhoptry-associated protein 2/3 (RAP2/3) | location=berg11:61847-63013(-) | length=388 | sequence_SO=chromosome | SO=protein_coding	PBANKA_110140	46 kDa	9
| organism=Plasmodium_berghei_ANKA | product=hypoxanthine-guanine phosphoribosyltransferase, putative (HGPRT) | location=berg12:371512-372668(-) | length=231 | sequence_SO=chromosome | SO=protein_coding	PBANKA_121080	27 kDa	9
| organism=Plasmodium_berghei_ANKA | product=oxidoreductase, putative | location=berg13:1571360-1572839(-) | length=334 | sequence_SO=chromosome | SO=protein_coding	PBANKA_134040	37 kDa	8
Cluster of | organism=Plasmodium_berghei_ANKA | product=dynamin-like protein, putative | location=berg09:160512-163406(+) | length=814 | sequence_SO=chromosome | SO=protein_coding (PBANKA_090360)	PBANKA_090360 [2]	94 kDa	8
| organism=Plasmodium_berghei_ANKA | product=thioredoxin peroxidase 1 (TPx1) | location=berg13:147230-147817(+) | length=195 | sequence_SO=chromosome | SO=protein_coding	PBANKA_130280	22 kDa	8
| organism=Plasmodium_berghei_ANKA | product=tryptophan/threonine-rich antigen, putative | location=berg05:898721-899905(-) | length=354 | sequence_SO=chromosome | SO=protein_coding	PBANKA_052430	44 kDa	8
| organism=Plasmodium_berghei_ANKA | product=40S ribosomal protein S19, putative | location=berg05:856646-857606(+) | length=172 | sequence_SO=chromosome | SO=protein_coding	PBANKA_052280	20 kDa	8
| organism=Plasmodium_berghei_ANKA | product=cytoadherence linked asexual protein, putative | location=berg14:22437-27033(-) | length=1296 | sequence_SO=chromosome | SO=protein_coding	PBANKA_140060	152 kDa	8
| organism=Plasmodium_berghei_ANKA | product=intra-erythrocytic P. berghei-induced structures protein 1 (IBIS1) | location=berg13:2483353-2484550(+) | length=327 | sequence_SO=chromosome | SO=protein_coding	PBANKA_136550	37 kDa	7
| organism=Plasmodium_berghei_ANKA | product=chaperone, putative | location=berg01:269623-271338(+) | length=543 | sequence_SO=chromosome | SO=protein_coding	PBANKA_010730	61 kDa	7
Cluster of | organism=Plasmodium_berghei_ANKA | product=tudor staphylococcal nuclease, putative (TSN) | location=berg09:492359-495649(-) | length=1013 | sequence_SO=chromosome | SO=protein_coding (PBANKA_091230)	PBANKA_091230 [2]	118 kDa	7
| organism=Plasmodium_berghei_ANKA | product=TCP-1/cpn60 chaperonin, putative | location=berg04:251593-253356(-) | length=539 | sequence_SO=chromosome | SO=protein_coding	PBANKA_040650	60 kDa	7
| organism=Plasmodium_berghei_ANKA | product=conserved rodent malaria protein, unknown function | location=berg11:1695580-1696372(+) | length=179 | sequence_SO=chromosome | SO=protein_coding	PBANKA_114580	20 kDa	7
| organism=Plasmodium_berghei_ANKA | product=60S ribosomal protein L10a, putative | location=berg13:242495-243635(+) | length=217 | sequence_SO=chromosome | SO=protein_coding	PBANKA_130510	25 kDa	7
| organism=Plasmodium_berghei_ANKA | product=40S ribosomal protein S3A, putative | location=berg12:560276-561558(+) | length=262 | sequence_SO=chromosome | SO=protein_coding	PBANKA_121560	30 kDa	7
Cluster of | organism=Plasmodium_berghei_ANKA | product=histone H2A, putative (H2A) | location=berg11:621544-621945(-) | length=133 | sequence_SO=chromosome | SO=protein_coding (PBANKA_111700)	PBANKA_111700 [14]	14 kDa	7
| organism=Plasmodium_berghei_ANKA | product=ADP/ATP transporter on adenylate translocase, putative | location=berg05:737041-737946(-) | length=301 | sequence_SO=chromosome | SO=protein_coding	PBANKA_052020	34 kDa	7
| organism=Plasmodium_berghei_ANKA | product=rhoptry-associated protein 1, putative (RAP1) | location=berg10:1254745-1256559(-) | length=604 | sequence_SO=chromosome | SO=protein_coding	PBANKA_103210	71 kDa	7
| organism=Plasmodium_berghei_ANKA | product=von willebrand factor a-domain-related protein (WARP) | location=berg12:1100216-1101127(+) | length=303 | sequence_SO=chromosome | SO=protein_coding	PBANKA_122890	34 kDa	6
| organism=Plasmodium_berghei_ANKA | product=T-complex protein 1 epsilon subunit, putative | location=berg12:676881-678488(-) | length=535 | sequence_SO=chromosome | SO=protein_coding	PBANKA_121820	59 kDa	6
Cluster of | organism=Plasmodium_berghei_ANKA | product=lysine--tRNA ligase, putative | location=berg13:2388411-2390489(-) | length=578 | sequence_SO=chromosome | SO=protein_coding (PBANKA_136290)	PBANKA_136290 [2]	67 kDa	6
Cluster of | organism=Plasmodium_berghei_ANKA | product=conserved Plasmodium protein, unknown function | location=berg09:1570576-1571972(-) | length=420 | sequence_SO=chromosome | SO=protein_coding (PBANKA_094250)	PBANKA_094250 [2]	49 kDa	6
| organism=Plasmodium_berghei_ANKA | product=hydrolase, putative | location=berg14:1503349-1504215(+) | length=288 | sequence_SO=chromosome | SO=protein_coding	PBANKA_144110	33 kDa	6
| organism=Plasmodium_berghei_ANKA | product=6-phosphogluconate dehydrogenase, decarboxylating, putative | location=berg13:746248-747666(+) | length=472 | sequence_SO=chromosome | SO=protein_coding	PBANKA_131840	53 kDa	6
| organism=Plasmodium_berghei_ANKA | product=vacuolar ATP synthase subunit a, putative | location=berg14:387557-389392(+) | length=611 | sequence_SO=chromosome | SO=protein_coding	PBANKA_141040	68 kDa	6
Cluster of | organism=Plasmodium_berghei_ANKA | product=26S proteasome regulatory subunit 7, putative | location=berg14:373185-374757(-) | length=420 | sequence_SO=chromosome | SO=protein_coding (PBANKA_141000)	PBANKA_141000 [2]	47 kDa	6
| organism=Plasmodium_berghei_ANKA | product=phosphoglycerate kinase, putative (PGK) | location=berg08:902635-903885(+) | length=416 | sequence_SO=chromosome | SO=protein_coding	PBANKA_082340	45 kDa	6
Cluster of | organism=Plasmodium_berghei_ANKA | product=cell division cycle protein 48 homologue, putative | location=berg11:681153-683726(-) | length=815 | sequence_SO=chromosome | SO=protein_coding (PBANKA_111860)	PBANKA_111860 [2]	91 kDa	6
| organism=Plasmodium_berghei_ANKA | product=60S ribosomal protein, putative | location=berg09:711713-712660(-) | length=315 | sequence_SO=chromosome | SO=protein_coding	PBANKA_091800	35 kDa	6
| organism=Plasmodium_berghei_ANKA | product=40S ribosomal protein S2, putative | location=berg13:471616-473013(+) | length=271 | sequence_SO=chromosome | SO=protein_coding	PBANKA_131080	30 kDa	6
Cluster of | organism=Plasmodium_berghei_ANKA | product=40S ribosomal protein S4, putative | location=berg09:1537194-1538255(+) | length=261 | sequence_SO=chromosome | SO=protein_coding (PBANKA_094150)	PBANKA_094150 [2]	30 kDa	6
| organism=Plasmodium_berghei_ANKA | product=histone H4, putative | location=berg09:1550855-1551166(+) | length=103 | sequence_SO=chromosome | SO=protein_coding	PBANKA_094190	11 kDa	6
Cluster of | organism=Plasmodium_berghei_ANKA | product=histone H3, putative | location=berg01:342642-343052(+) | length=136 | sequence_SO=chromosome | SO=protein_coding (PBANKA_010880)	PBANKA_010880 [6]	15 kDa	6
| organism=Plasmodium_berghei_ANKA | product=replication protein A1, small fragment | location=berg04:632944-634689(-) | length=486 | sequence_SO=chromosome | SO=protein_coding	PBANKA_041660	57 kDa	5
| organism=Plasmodium_berghei_ANKA | product=fructose-bisphosphate aldolase 2 (ALDO2) | location=berg13:394044-395494(-) | length=369 | sequence_SO=chromosome | SO=protein_coding	PBANKA_130860	40 kDa	5
Cluster of | organism=Plasmodium_berghei_ANKA | product=26S proteasome subunit, putative | location=berg13:1197211-1201087(+) | length=1219 | sequence_SO=chromosome | SO=protein_coding (PBANKA_132970)	PBANKA_132970 [2]	138 kDa	5
| organism=Plasmodium_berghei_ANKA | product=early transcribed membrane protein (ETRAMP) | location=berg05:634391-635332(+) | length=313 | sequence_SO=chromosome | SO=protein_coding	PBANKA_051700	33 kDa	5
Cluster of | organism=Plasmodium_berghei_ANKA | product=HSP40, subfamily A, putative | location=berg06:434517-436237(-) | length=424 | sequence_SO=chromosome | SO=protein_coding (PBANKA_061090)	PBANKA_061090 [2]	48 kDa	5
Cluster of | organism=Plasmodium_berghei_ANKA | product=60S ribosomal protein L10, putative | location=berg10:1122003-1122662(-) | length=219 | sequence_SO=chromosome | SO=protein_coding (PBANKA_102840)	PBANKA_102840 [2]	25 kDa	5
| organism=Plasmodium_berghei_ANKA | product=60S ribosomal protein L4, putative | location=berg11:239269-240504(-) | length=411 | sequence_SO=chromosome | SO=protein_coding	PBANKA_110670	46 kDa	5
Cluster of | organism=Plasmodium_berghei_ANKA | product=DNA/RNA-binding protein Alba 1, putative (ALBA1) | location=berg14:854273-855001(-) | length=242 | sequence_SO=chromosome | SO=protein_coding (PBANKA_142330)	PBANKA_142330 [2]	27 kDa	5
| organism=Plasmodium_berghei_ANKA | product=conserved rodent malaria protein, unknown function | location=berg06:888660-891211(-) | length=793 | sequence_SO=chromosome | SO=protein_coding	PBANKA_062310	93 kDa	5
| organism=Plasmodium_berghei_ANKA | product=merozoite surface protein 8 (MSP8) | location=berg11:86718-87947(-) | length=409 | sequence_SO=chromosome | SO=protein_coding	PBANKA_110220	47 kDa	5
| organism=Plasmodium_berghei_ANKA | product=adenosylhomocysteinase, putative (SAHH) | location=berg12:1336220-1337659(+) | length=479 | sequence_SO=chromosome | SO=protein_coding	PBANKA_123560	54 kDa	5
| organism=Plasmodium_berghei_ANKA | product=40S ribosomal protein S5, putative | location=berg06:738544-739318(-) | length=194 | sequence_SO=chromosome | SO=protein_coding	PBANKA_061910	22 kDa	5
| organism=Plasmodium_berghei_ANKA | product=conserved Plasmodium protein, unknown function | location=berg08:1015531-1016537(+) | length=222 | sequence_SO=chromosome | SO=protein_coding	PBANKA_082670	25 kDa	5
| organism=Plasmodium_berghei_ANKA | product=40S ribosomal protein S15A, putative | location=berg04:532091-532600(+) | length=130 | sequence_SO=chromosome | SO=protein_coding	PBANKA_041460	15 kDa	5
Cluster of | organism=Plasmodium_berghei_ANKA | product=DNA replication licensing factor MCM7, putative (MCM7) | location=berg08:160365-162848(-) | length=827 | sequence_SO=chromosome | SO=protein_coding (PBANKA_080310)	PBANKA_080310 [2]	95 kDa	4
| organism=Plasmodium_berghei_ANKA | product=GTP-binding nuclear protein, putative | location=berg09:1147494-1148292(+) | length=214 | sequence_SO=chromosome | SO=protein_coding	PBANKA_093030 (+1)	25 kDa	4
| organism=Plasmodium_berghei_ANKA | product=serine hydroxymethyltransferase, putative (SHMT) | location=berg14:1891811-1893448(+) | length=442 | sequence_SO=chromosome | SO=protein_coding	PBANKA_145020	50 kDa	4
Cluster of | organism=Plasmodium_berghei_ANKA | product=conserved Plasmodium protein, unknown function | location=berg06:167284-169217(-) | length=330 | sequence_SO=chromosome | SO=protein_coding (PBANKA_060430)	PBANKA_060430 [2]	39 kDa	4
| organism=Plasmodium_berghei_ANKA | product=DNA replication licensing factor MCM4, putative (MCM4) | location=berg14:573167-576001(+) | length=944 | sequence_SO=chromosome | SO=protein_coding	PBANKA_141560	108 kDa	4
Cluster of | organism=Plasmodium_berghei_ANKA | product=DNA replication licensing factor MCM2, putative (MCM2) | location=berg10:961008-964115(-) | length=971 | sequence_SO=chromosome | SO=protein_coding (PBANKA_102490)	PBANKA_102490 [2]	111 kDa	4
| organism=Plasmodium_berghei_ANKA | product=chromatin assembly factor 1 protein WD40 domain, putative | location=berg02:134161-135501(+) | length=446 | sequence_SO=chromosome | SO=protein_coding	PBANKA_020300	51 kDa	4
| organism=Plasmodium_berghei_ANKA | product=Hsp70/Hsp90 organizing protein, putative (HOP) | location=berg10:447225-448904(-) | length=559 | sequence_SO=chromosome | SO=protein_coding	PBANKA_101050	66 kDa	4
| organism=Plasmodium_berghei_ANKA | product=DNA/RNA-binding protein Alba 4, putative (ALBA4) | location=berg13:2287319-2288555(-) | length=374 | sequence_SO=chromosome | SO=protein_coding	PBANKA_136030	42 kDa	4
| organism=Plasmodium_berghei_ANKA | product=DNA replication licensing factor MCM6, putative (MCM6) | location=berg11:1164601-1167423(+) | length=940 | sequence_SO=chromosome | SO=protein_coding	PBANKA_113160	107 kDa	4
| organism=Plasmodium_berghei_ANKA | product=tryptophan-rich antigen, putative | location=berg06:899706-900832(-) | length=342 | sequence_SO=chromosome | SO=protein_coding	PBANKA_062330	42 kDa	4
| organism=Plasmodium_berghei_ANKA | product=CCR4-associated factor 16, putative (CAF16) | location=berg10:455384-456898(+) | length=257 | sequence_SO=chromosome | SO=protein_coding	PBANKA_101080	30 kDa	4
Cluster of | organism=Plasmodium_berghei_ANKA | product=ATP-dependent RNA helicase UAP56, putative (UAP56) | location=berg03:241443-242934(-) | length=466 | sequence_SO=chromosome | SO=protein_coding (PBANKA_030680)	PBANKA_030680 [2]	53 kDa	4
| organism=Plasmodium_berghei_ANKA | product=protein disulfide isomerase related protein, putative | location=berg09:581032-582303(+) | length=423 | sequence_SO=chromosome | SO=protein_coding	PBANKA_091430	49 kDa	4
| organism=Plasmodium_berghei_ANKA | product=60S ribosomal protein L12, putative | location=berg12:1209071-1209860(-) | length=165 | sequence_SO=chromosome | SO=protein_coding	PBANKA_123180	18 kDa	4
| organism=Plasmodium_berghei_ANKA | product=thioredoxin-related protein, putative | location=berg13:2465392-2466279(-) | length=206 | sequence_SO=chromosome | SO=protein_coding	PBANKA_136520	24 kDa	4
Cluster of | organism=Plasmodium_berghei_ANKA | product=proline--tRNA ligase, putative | location=berg14:1093232-1095499(-) | length=755 | sequence_SO=chromosome | SO=protein_coding (PBANKA_142960)	PBANKA_142960 [2]	88 kDa	4
| organism=Plasmodium_berghei_ANKA | product=eukaryotic translation initiation factor 2 gamma subunit, putative | location=berg10:1249838-1251235(-) | length=465 | sequence_SO=chromosome | SO=protein_coding	PBANKA_103190	51 kDa	4
| organism=Plasmodium_berghei_ANKA | product=40S ribosomal protein S7, putative | location=berg14:54945-55712(-) | length=194 | sequence_SO=chromosome | SO=protein_coding	PBANKA_140130	22 kDa	4
| organism=Plasmodium_berghei_ANKA | product=60S ribosomal protein L18, putative | location=berg13:2049497-2050322(-) | length=184 | sequence_SO=chromosome | SO=protein_coding	PBANKA_135440	22 kDa	4
| organism=Plasmodium_berghei_ANKA | product=erythrocyte membrane antigen 1 | location=berg10:26152-27311(+) | length=339 | sequence_SO=chromosome | SO=protein_coding	PBANKA_100060	38 kDa	4
| organism=Plasmodium_berghei_ANKA | product=Rab6 | location=berg09:181624-182782(+) | length=207 | sequence_SO=chromosome | SO=protein_coding	PBANKA_090410 (+1)	24 kDa	4
| organism=Plasmodium_berghei_ANKA | product=6-phosphofructokinase, putative (PFK9) | location=berg08:663800-667699(-) | length=1299 | sequence_SO=chromosome | SO=protein_coding	PBANKA_081640	147 kDa	4
| organism=Plasmodium_berghei_ANKA | product=conserved Plasmodium protein, unknown function | location=berg13:1081475-1083034(-) | length=301 | sequence_SO=chromosome | SO=protein_coding	PBANKA_132730	34 kDa	4
| organism=Plasmodium_berghei_ANKA | product=circumsporozoite-related antigen (EXP1) | location=berg09:1027730-1028455(+) | length=166 | sequence_SO=chromosome | SO=protein_coding	PBANKA_092670	18 kDa	4
| organism=Plasmodium_berghei_ANKA | product=heat shock protein 90, putative | location=berg09:1132541-1134949(+) | length=802 | sequence_SO=chromosome | SO=protein_coding	PBANKA_092990	92 kDa	4
| organism=Plasmodium_berghei_ANKA | product=multidrug resistance protein, putative (MDR1) | location=berg12:1430325-1434584(+) | length=1419 | sequence_SO=chromosome | SO=protein_coding	PBANKA_123780	161 kDa	4
| organism=Plasmodium_berghei_ANKA | product=secreted acid phosphatase, putative,glideosome-associated protein 50, putative (GAP50) | location=berg08:749214-750401(-) | length=395 | sequence_SO=chromosome | SO=protein_coding	PBANKA_081900	44 kDa	4
| organism=Plasmodium_berghei_ANKA | product=serine repeat antigen 1 (SERA1) | location=berg03:170517-175182(-) | length=1406 | sequence_SO=chromosome | SO=protein_coding	PBANKA_030510	155 kDa	4
| organism=Plasmodium_berghei_ANKA | product=histone H2B variant, putative (H2B.Z) | location=berg14:773045-773416(-) | length=123 | sequence_SO=chromosome | SO=protein_coding	PBANKA_142060 (+1)	14 kDa	4
| organism=Plasmodium_berghei_ANKA | product=secreted ookinete adhesive protein (SOAP) | location=berg10:1486414-1486914(-) | length=166 | sequence_SO=chromosome | SO=protein_coding	PBANKA_103780	18 kDa	3
| organism=Plasmodium_berghei_ANKA | product=secreted ookinete protein, putative (PSOP12) | location=berg11:499342-501641(+) | length=721 | sequence_SO=chromosome | SO=protein_coding	PBANKA_111340	85 kDa	3
| organism=Plasmodium_berghei_ANKA | product=gamete egress and sporozoite traversal protein (GEST) | location=berg13:528256-529360(-) | length=249 | sequence_SO=chromosome | SO=protein_coding	PBANKA_131270	29 kDa	3
| organism=Plasmodium_berghei_ANKA | product=ubiquitin-activating enzyme e1, putative (UBA1) | location=berg14:1487363-1491016(+) | length=1120 | sequence_SO=chromosome | SO=protein_coding	PBANKA_144070	129 kDa	3
| organism=Plasmodium_berghei_ANKA | product=glutamate--tRNA ligase, putative | location=berg13:2357393-2359804(-) | length=803 | sequence_SO=chromosome | SO=protein_coding	PBANKA_136200	94 kDa	3
| organism=Plasmodium_berghei_ANKA | product=exportin 1, putative | location=berg04:64222-68233(-) | length=1246 | sequence_SO=chromosome | SO=protein_coding	PBANKA_040150	147 kDa	3
| organism=Plasmodium_berghei_ANKA | product=methionine--tRNA ligase, putative | location=berg05:682838-685534(+) | length=898 | sequence_SO=chromosome | SO=protein_coding	PBANKA_051870	105 kDa	3
| organism=Plasmodium_berghei_ANKA | product=40S ribosomal protein S18, putative | location=berg09:844438-845119(+) | length=156 | sequence_SO=chromosome | SO=protein_coding	PBANKA_092210	18 kDa	3
| organism=Plasmodium_berghei_ANKA | product=elongation factor 1-beta, putative | location=berg08:599897-600670(+) | length=257 | sequence_SO=chromosome | SO=protein_coding	PBANKA_081420	30 kDa	3
| organism=Plasmodium_berghei_ANKA | product=eukaryotic translation initiation factor 3 subunit 7, putative | location=berg12:213199-214812(+) | length=537 | sequence_SO=chromosome | SO=protein_coding	PBANKA_120610	62 kDa	3
| organism=Plasmodium_berghei_ANKA | product=GPI-anchored micronemal antigen, putative (GAMA) | location=berg07:77182-79059(+) | length=625 | sequence_SO=chromosome | SO=protein_coding	PBANKA_070190	71 kDa	3
| organism=Plasmodium_berghei_ANKA | product=ADP-ribosylation factor, putative (ARF1) | location=berg05:203357-204429(-) | length=181 | sequence_SO=chromosome | SO=protein_coding	PBANKA_050510 (+1)	21 kDa	3
| organism=Plasmodium_berghei_ANKA | product=40S ribosomal protein S14, putative | location=berg12:1175827-1176550(-) | length=151 | sequence_SO=chromosome | SO=protein_coding	PBANKA_123100	16 kDa	3
| organism=Plasmodium_berghei_ANKA | product=GTP-binding protein, putative | location=berg06:758550-759952(+) | length=393 | sequence_SO=chromosome | SO=protein_coding	PBANKA_061990	45 kDa	3
| organism=Plasmodium_berghei_ANKA | product=proteasome regulatory subunit, putative | location=berg11:1622789-1624037(-) | length=311 | sequence_SO=chromosome | SO=protein_coding	PBANKA_114400	35 kDa	3
| organism=Plasmodium_berghei_ANKA | product=histone H2B, putative (H2B) | location=berg09:1547427-1547783(-) | length=118 | sequence_SO=chromosome | SO=protein_coding	PBANKA_094180 (+1)	13 kDa	3
Cluster of | organism=Plasmodium_berghei_ANKA | product=long-chain acyl-CoA synthase, putative | location=berg03:414233-416494(-) | length=753 | sequence_SO=chromosome | SO=protein_coding (PBANKA_031180)	PBANKA_031180 [2]	86 kDa	3
| organism=Plasmodium_berghei_ANKA | product=60S ribosomal protein L6, putative | location=berg13:1498408-1499540(-) | length=190 | sequence_SO=chromosome | SO=protein_coding	PBANKA_133830	22 kDa	3
Cluster of | organism=Plasmodium_berghei_ANKA | product=26S proteasome regulatory subunit, putative | location=berg14:200094-201275(-) | length=393 | sequence_SO=chromosome | SO=protein_coding (PBANKA_140490)	PBANKA_140490 [2]	45 kDa	3
| organism=Plasmodium_berghei_ANKA | product=erythrocyte membrane associated protein 1 (EMAP1) | location=berg08:1339963-1341696(-) | length=330 | sequence_SO=chromosome | SO=protein_coding	PBANKA_083680	38 kDa	3
Cluster of | organism=Plasmodium_berghei_ANKA | product=protein disulfide isomerase | location=berg07:106464-108021(+) | length=482 | sequence_SO=chromosome | SO=protein_coding (PBANKA_070280)	PBANKA_070280 [2]	55 kDa	3
| organism=Plasmodium_berghei_ANKA | product=40S ribosomal protein S2B, putative | location=berg05:447286-448370(+) | length=263 | sequence_SO=chromosome | SO=protein_coding	PBANKA_051090	30 kDa	3
| organism=Plasmodium_berghei_ANKA | product=40S ribosomal protein S16, putative | location=berg14:861715-862554(+) | length=144 | sequence_SO=chromosome | SO=protein_coding	PBANKA_142360	16 kDa	3
| organism=Plasmodium_berghei_ANKA | product=cysteine--tRNA ligase, putative | location=berg12:498364-500998(-) | length=668 | sequence_SO=chromosome | SO=protein_coding	PBANKA_121360	78 kDa	3
| organism=Plasmodium_berghei_ANKA | product=40S ribosomal protein S17, putative | location=berg14:2114620-2115405(+) | length=137 | sequence_SO=chromosome | SO=protein_coding	PBANKA_145610	16 kDa	3
| organism=Plasmodium_berghei_ANKA | product=nicotinate phosphoribosyltransferase, putative | location=berg11:1019178-1021247(-) | length=689 | sequence_SO=chromosome | SO=protein_coding	PBANKA_112770	80 kDa	3
| organism=Plasmodium_berghei_ANKA | product=eukaryotic translation initiation factor 3 subunit, putative | location=berg12:1233307-1235457(+) | length=716 | sequence_SO=chromosome | SO=protein_coding	PBANKA_123250	84 kDa	3
| organism=Plasmodium_berghei_ANKA | product=60S ribosomal protein L21e, putative | location=berg10:746316-746801(+) | length=161 | sequence_SO=chromosome | SO=protein_coding	PBANKA_101860	19 kDa	3
| organism=Plasmodium_berghei_ANKA | product=60S ribosomal protein L7-3, putative | location=berg10:768341-769625(-) | length=284 | sequence_SO=chromosome | SO=protein_coding	PBANKA_101940	33 kDa	3
| organism=Plasmodium_berghei_ANKA | product=transportin, putative | location=berg11:946372-949872(+) | length=1166 | sequence_SO=chromosome | SO=protein_coding	PBANKA_112640	134 kDa	3
| organism=Plasmodium_berghei_ANKA | product=conserved Plasmodium protein, unknown function | location=berg13:844063-845838(-) | length=591 | sequence_SO=chromosome | SO=protein_coding	PBANKA_132100	71 kDa	3
| organism=Plasmodium_berghei_ANKA | product=S-adenosylmethionine synthetase, putative | location=berg08:892660-893868(+) | length=402 | sequence_SO=chromosome | SO=protein_coding	PBANKA_082310	45 kDa	3
Cluster of | organism=Plasmodium_berghei_ANKA | product=heat shock protein hsp70 homologue, putative (UIS24) | location=berg09:583130-585121(-) | length=663 | sequence_SO=chromosome | SO=protein_coding (PBANKA_091440)	PBANKA_091440 [2]	73 kDa	3
| organism=Plasmodium_berghei_ANKA | product=early transcribed membrane protein (ETRAMP) | location=berg02:92895-93428(-) | length=177 | sequence_SO=chromosome | SO=protein_coding	PBANKA_020160	19 kDa	3
| organism=Plasmodium_berghei_ANKA | product=60S ribosomal protein L18-2, putative | location=berg13:2052220-2053449(+) | length=187 | sequence_SO=chromosome | SO=protein_coding	PBANKA_135450	22 kDa	3
Cluster of | organism=Plasmodium_berghei_ANKA | product=early transcribed membrane protein (SEP1) | location=berg05:921245-921592(-) | length=115 | sequence_SO=chromosome | SO=protein_coding (PBANKA_052480)	PBANKA_052480 [2]	12 kDa	3
| organism=Plasmodium_berghei_ANKA | product=60S ribosomal protein L15, putative | location=berg07:605279-606166(-) | length=205 | sequence_SO=chromosome | SO=protein_coding	PBANKA_071780	24 kDa	3
| organism=Plasmodium_berghei_ANKA | product=heat shock protein 60, putative | location=berg12:508279-510311(-) | length=579 | sequence_SO=chromosome | SO=protein_coding	PBANKA_121400	62 kDa	3
| organism=Plasmodium_berghei_ANKA | product=lysophospholipase, putative | location=berg12:754826-755959(-) | length=377 | sequence_SO=chromosome | SO=protein_coding	PBANKA_122030	43 kDa	3
| organism=Plasmodium_berghei_ANKA | product=RNAse L inhibitor protein, putative | location=berg11:1625769-1627817(-) | length=619 | sequence_SO=chromosome | SO=protein_coding	PBANKA_114410 (+1)	70 kDa	3
| organism=Plasmodium_berghei_ANKA | product=ATPase, putative | location=berg06:417517-421935(-) | length=1472 | sequence_SO=chromosome | SO=protein_coding	PBANKA_061040	166 kDa	3
| organism=Plasmodium_berghei_ANKA | product=protein transport protein Sec31, putative (SEC31) | location=berg03:381422-385971(-) | length=1388 | sequence_SO=chromosome | SO=protein_coding	PBANKA_031100	157 kDa	3
Cluster of | organism=Plasmodium_berghei_ANKA | product=DNA replication licensing factor MCM5, putative (MCM5) | location=berg06:410706-413849(+) | length=758 | sequence_SO=chromosome | SO=protein_coding (PBANKA_061020)	PBANKA_061020 [2]	86 kDa	2
Cluster of | organism=Plasmodium_berghei_ANKA | product=dynein heavy chain, putative | location=berg09:955954-971682(-) | length=5176 | sequence_SO=chromosome | SO=protein_coding (PBANKA_092540)	PBANKA_092540 [2]	605 kDa	2
| organism=Plasmodium_berghei_ANKA | product=Ran-binding protein, putative | location=berg08:494927-499506(-) | length=1160 | sequence_SO=chromosome | SO=protein_coding	PBANKA_081130	135 kDa	2
| organism=Plasmodium_berghei_ANKA | product=RNA helicase, putative | location=berg14:984023-986752(-) | length=909 | sequence_SO=chromosome | SO=protein_coding	PBANKA_142690	104 kDa	2
| organism=Plasmodium_berghei_ANKA | product=eukaryotic translation initiation factor 3 subunit 10, putative | location=berg14:1063093-1066884(-) | length=1263 | sequence_SO=chromosome | SO=protein_coding	PBANKA_142870	152 kDa	2
| organism=Plasmodium_berghei_ANKA | product=FK506-binding protein (FKBP)-type peptidyl-prolyl isomerase, putative (FKBP35) | location=berg14:2248833-2249753(-) | length=306 | sequence_SO=chromosome | SO=protein_coding	PBANKA_146040	35 kDa	2
| organism=Plasmodium_berghei_ANKA | product=60S ribosomal protein L27, putative | location=berg13:960103-961256(-) | length=146 | sequence_SO=chromosome | SO=protein_coding	PBANKA_132440	17 kDa	2
| organism=Plasmodium_berghei_ANKA | product=40S ribosomal protein S8e, putative | location=berg10:1344631-1345617(-) | length=218 | sequence_SO=chromosome | SO=protein_coding	PBANKA_103390	25 kDa	2
| organism=Plasmodium_berghei_ANKA | product=proliferation-associated protein 2g4, putative | location=berg10:664748-666076(+) | length=377 | sequence_SO=chromosome | SO=protein_coding	PBANKA_101630	43 kDa	2
| organism=Plasmodium_berghei_ANKA | product=secreted ookinete protein, putative (PSOP1) | location=berg06:742115-743554(+) | length=479 | sequence_SO=chromosome | SO=protein_coding	PBANKA_061920	55 kDa	2
| organism=Plasmodium_berghei_ANKA | product=DNA polymerase delta catalytic subunit, putative | location=berg05:58521-61814(+) | length=1097 | sequence_SO=chromosome | SO=protein_coding	PBANKA_050130	127 kDa	2
| organism=Plasmodium_berghei_ANKA | product=tRNA binding protein, putative | location=berg13:276029-277523(-) | length=403 | sequence_SO=chromosome | SO=protein_coding	PBANKA_130620	46 kDa	2
| organism=Plasmodium_berghei_ANKA | product=alanine--tRNA ligase, putative (AlaRS) | location=berg11:1609448-1613104(+) | length=1218 | sequence_SO=chromosome | SO=protein_coding	PBANKA_114360	141 kDa	2
Cluster of | organism=Plasmodium_berghei_ANKA | product=heat shock protein 101, putative | location=berg09:1175220-1178317(+) | length=907 | sequence_SO=chromosome | SO=protein_coding (PBANKA_093120)	PBANKA_093120 [2]	103 kDa	2
| organism=Plasmodium_berghei_ANKA | product=small GTP-binding protein sar1, putative (SAR1) | location=berg07:635357-636357(+) | length=191 | sequence_SO=chromosome | SO=protein_coding	PBANKA_071880	22 kDa	2
| organism=Plasmodium_berghei_ANKA | product=hexose transporter (HT) | location=berg03:82117-83634(-) | length=505 | sequence_SO=chromosome | SO=protein_coding	PBANKA_030250	56 kDa	2
| organism=Plasmodium_berghei_ANKA | product=40S ribosomal protein S13, putative | location=berg11:1296144-1296599(+) | length=151 | sequence_SO=chromosome | SO=protein_coding	PBANKA_113510 (+1)	17 kDa	2
| organism=Plasmodium_berghei_ANKA | product=40S ribosomal protein S15/S19, putative | location=berg14:602251-603341(+) | length=145 | sequence_SO=chromosome | SO=protein_coding	PBANKA_141630	17 kDa	2
| organism=Plasmodium_berghei_ANKA | product=macrophage migration inhibitory factor (MIF) | location=berg14:1640284-1640782(+) | length=116 | sequence_SO=chromosome | SO=protein_coding	PBANKA_144400	13 kDa	2
| organism=Plasmodium_berghei_ANKA | product=60S acidic ribosomal protein P2, putative | location=berg04:293777-294112(+) | length=111 | sequence_SO=chromosome | SO=protein_coding	PBANKA_040770	12 kDa	2
| organism=Plasmodium_berghei_ANKA | product=nucleosome assembly protein 1, putative (NAPL) | location=berg06:115005-116683(-) | length=345 | sequence_SO=chromosome | SO=protein_coding	PBANKA_060270 (+1)	40 kDa	2
| organism=Plasmodium_berghei_ANKA | product=60S ribosomal protein L23, putative | location=berg13:1815889-1816790(+) | length=139 | sequence_SO=chromosome | SO=protein_coding	PBANKA_134670 (+1)	15 kDa	2
| organism=Plasmodium_falciparum_3D7 | product=60S ribosomal protein L11a, putative | location=Pf3D7_07_v3:858742-859492(-) | length=173 | sequence_SO=chromosome | SO=protein_coding	PF3D7_0719600	20 kDa	2
Cluster of | organism=Plasmodium_berghei_ANKA | product=glycerol kinase, putative | location=berg13:2431187-2432692(+) | length=501 | sequence_SO=chromosome | SO=protein_coding (PBANKA_136430)	PBANKA_136430 [2]	57 kDa	2
| organism=Plasmodium_berghei_ANKA | product=sec61 alpha subunit, putative | location=berg13:2238774-2240611(+) | length=472 | sequence_SO=chromosome | SO=protein_coding	PBANKA_135900	52 kDa	2
| organism=Plasmodium_berghei_ANKA | product=NAD synthase, putative | location=berg08:1059231-1061861(+) | length=876 | sequence_SO=chromosome | SO=protein_coding	PBANKA_082750	102 kDa	2
| organism=Plasmodium_berghei_ANKA | product=25 kDa ookinete surface antigen precursor (P25) | location=berg05:567248-567901(-) | length=217 | sequence_SO=chromosome | SO=protein_coding	PBANKA_051500	24 kDa	2
| organism=Plasmodium_berghei_ANKA | product=ribosomal protein L27a, putative | location=berg11:638181-638796(+) | length=148 | sequence_SO=chromosome | SO=protein_coding	PBANKA_111750	17 kDa	2
| organism=Plasmodium_berghei_ANKA | product=40S ribosomal protein S10, putative | location=berg06:677086-678002(+) | length=137 | sequence_SO=chromosome | SO=protein_coding	PBANKA_061720 (+1)	17 kDa	2
| organism=Plasmodium_berghei_ANKA | product=receptor for activated C kinase, putative (RACK) | location=berg07:148240-149782(+) | length=322 | sequence_SO=chromosome | SO=protein_coding	PBANKA_070390	36 kDa	2
| organism=Plasmodium_berghei_ANKA | product=conserved Plasmodium protein, unknown function | location=berg08:186023-189706(+) | length=1227 | sequence_SO=chromosome | SO=protein_coding	PBANKA_080360	144 kDa	2
| organism=Plasmodium_berghei_ANKA | product=HVA22-like protein, putative | location=berg11:1291846-1292307(-) | length=153 | sequence_SO=chromosome | SO=protein_coding	PBANKA_113500	18 kDa	2
| organism=Plasmodium_berghei_ANKA | product=tubulin gamma chain, putative | location=berg12:993322-994680(-) | length=452 | sequence_SO=chromosome | SO=protein_coding	PBANKA_122660 (+1)	52 kDa	2
| organism=Plasmodium_berghei_ANKA | product=60S ribosomal protein L38e, putative | location=berg09:714800-715045(+) | length=81 | sequence_SO=chromosome | SO=protein_coding	PBANKA_091810	10 kDa	2
| organism=Plasmodium_berghei_ANKA | product=phenylalanyl-tRNA synthetase beta chain, putative | location=berg09:1587972-1590223(+) | length=625 | sequence_SO=chromosome | SO=protein_coding	PBANKA_094290	73 kDa	2
| organism=Plasmodium_berghei_ANKA | product=40S ribosomal protein S11, putative | location=berg08:357334-358497(-) | length=161 | sequence_SO=chromosome | SO=protein_coding	PBANKA_080760 (+1)	19 kDa	2
| organism=Plasmodium_berghei_ANKA | product=60S ribosomal protein L13, putative | location=berg12:94488-95454(-) | length=202 | sequence_SO=chromosome | SO=protein_coding	PBANKA_120240	24 kDa	2
| organism=Plasmodium_berghei_ANKA | product=exported protein 2, putative (EXP2) | location=berg13:1365233-1366261(-) | length=269 | sequence_SO=chromosome | SO=protein_coding	PBANKA_133430	32 kDa	2
| organism=Plasmodium_berghei_ANKA | product=plasmepsin IV (PM4) | location=berg10:1366386-1367738(-) | length=450 | sequence_SO=chromosome | SO=protein_coding	PBANKA_103440	50 kDa	2
Cluster of | organism=Plasmodium_berghei_ANKA | product=RNA-binding protein musashi, putative (HoMu) | location=berg08:705882-706916(-) | length=344 | sequence_SO=chromosome | SO=protein_coding (PBANKA_081770)	PBANKA_081770 [2]	40 kDa	2
| organism=Plasmodium_berghei_ANKA | product=conserved Plasmodium protein, unknown function | location=berg07:284077-287517(+) | length=1146 | sequence_SO=chromosome | SO=protein_coding	PBANKA_070770	132 kDa	2
Cluster of | organism=Plasmodium_berghei_ANKA | product=glucose-6-phosphate dehydrogenase-6- phosphogluconolactonase (G6PD-6PGL) | location=berg13:717636-720488(-) | length=950 | sequence_SO=chromosome | SO=protein_coding (PBANKA_131750)	PBANKA_131750 [2]	110 kDa	2
| organism=Plasmodium_berghei_ANKA | product=rhoptry protein, putative | location=berg01:13433-15372(+) | length=613 | sequence_SO=chromosome | SO=protein_coding	PBANKA_010040	72 kDa	2
| organism=Plasmodium_berghei_ANKA | product=myosin A (MyoA) | location=berg13:2088223-2090918(+) | length=817 | sequence_SO=chromosome | SO=protein_coding	PBANKA_135570	92 kDa	2
| organism=Plasmodium_berghei_ANKA | product=rhoptry-associated leucine zipper-like protein 1, putative (RALP1) | location=berg06:752212-753846(+) | length=544 | sequence_SO=chromosome | SO=protein_coding	PBANKA_061970	63 kDa	2
| organism=Plasmodium_berghei_ANKA | product=60S ribosomal protein L13-2, putative | location=berg14:859336-860083(-) | length=215 | sequence_SO=chromosome | SO=protein_coding	PBANKA_142350	25 kDa	2
| organism=Plasmodium_berghei_ANKA | product=serine repeat antigen 2 (SERA2) | location=berg03:165144-168975(-) | length=1122 | sequence_SO=chromosome | SO=protein_coding	PBANKA_030500	124 kDa	2
| organism=Plasmodium_berghei_ANKA | product=merozoite surface protein 7 (MSP7) | location=berg13:1881543-1882550(-) | length=335 | sequence_SO=chromosome | SO=protein_coding	PBANKA_134910	38 kDa	2
| organism=Plasmodium_berghei_ANKA | product=transport protein Sec13, putative | location=berg14:1686981-1689130(+) | length=687 | sequence_SO=chromosome | SO=protein_coding	PBANKA_144540	77 kDa	2
| organism=Plasmodium_berghei_ANKA | product=40S ribosomal protein S20e, putative | location=berg12:75865-76753(-) | length=118 | sequence_SO=chromosome | SO=protein_coding	PBANKA_120190	14 kDa	2
| organism=Plasmodium_berghei_ANKA | product=LCCL domain-containing protein (CCp3) | location=berg10:1392158-1396072(-) | length=1304 | sequence_SO=chromosome | SO=protein_coding	PBANKA_103520	148 kDa	1
Cluster of | organism=Plasmodium_berghei_ANKA | product=dynein heavy chain, putative | location=berg05:307086-323015(-) | length=5309 | sequence_SO=chromosome | SO=protein_coding (PBANKA_050730)	PBANKA_050730 [2]	624 kDa	1
| organism=Plasmodium_berghei_ANKA | product=DNA replication licensing factor MCM3, putative (MCM3) | location=berg12:1564154-1567082(-) | length=945 | sequence_SO=chromosome | SO=protein_coding	PBANKA_124180	107 kDa	1
Cluster of | organism=Plasmodium_falciparum_3D7 | product=dynein heavy chain, putative | location=Pf3D7_09_v3:251353-269709(-) | length=6118 | sequence_SO=chromosome | SO=protein_coding (PF3D7_0905300)	PF3D7_0905300 [2]	721 kDa	1
| organism=Plasmodium_berghei_ANKA | product=conserved Plasmodium protein, unknown function | location=berg08:474627-476656(-) | length=562 | sequence_SO=chromosome | SO=protein_coding	PBANKA_081080	67 kDa	1
| organism=Plasmodium_berghei_ANKA | product=acyl-CoA synthetase, putative | location=berg12:1508785-1510809(+) | length=674 | sequence_SO=chromosome | SO=protein_coding	PBANKA_123990	77 kDa	1
| organism=Plasmodium_berghei_ANKA | product=replication factor C subunit 4, putative | location=berg14:2091359-2092601(+) | length=336 | sequence_SO=chromosome | SO=protein_coding	PBANKA_145510	38 kDa	1
| organism=Plasmodium_berghei_ANKA | product=DnaJ protein, putative | location=berg12:889813-892263(+) | length=816 | sequence_SO=chromosome | SO=protein_coding	PBANKA_122420	93 kDa	1
| organism=Plasmodium_berghei_ANKA | product=FACT complex subunit SPT16 (FACT-L) | location=berg12:1222103-1225637(+) | length=1096 | sequence_SO=chromosome | SO=protein_coding	PBANKA_123220	128 kDa	1
| organism=Plasmodium_berghei_ANKA | product=eukaryotic translation initiation factor 3 subunit 8, putative | location=berg06:188777-191984(-) | length=925 | sequence_SO=chromosome | SO=protein_coding	PBANKA_060480	109 kDa	1
| organism=Plasmodium_berghei_ANKA | product=26S protease subunit regulatory subunit 6a, putative | location=berg09:707804-709159(-) | length=451 | sequence_SO=chromosome | SO=protein_coding	PBANKA_091790	51 kDa	1
| organism=Plasmodium_berghei_ANKA | product=eukaryotic translation initiation factor 3, subunit 6, putative | location=berg12:1597486-1599241(-) | length=527 | sequence_SO=chromosome | SO=protein_coding	PBANKA_124280	63 kDa	1
Cluster of | organism=Plasmodium_berghei_ANKA | product=60S ribosomal protein L5, putative | location=berg10:771314-772936(+) | length=293 | sequence_SO=chromosome | SO=protein_coding (PBANKA_101950)	PBANKA_101950 [2]	34 kDa	1
| organism=Plasmodium_berghei_ANKA | product=60S ribosomal protein L14, putative | location=berg10:560912-561776(-) | length=156 | sequence_SO=chromosome | SO=protein_coding	PBANKA_101310	18 kDa	1
| organism=Plasmodium_berghei_ANKA | product=calcyclin binding protein, putative | location=berg14:1975548-1976228(-) | length=226 | sequence_SO=chromosome | SO=protein_coding	PBANKA_145260	27 kDa	1
| organism=Plasmodium_berghei_ANKA | product=vacuolar ATP synthase subunit b, putative | location=berg10:187024-188664(-) | length=494 | sequence_SO=chromosome | SO=protein_coding	PBANKA_100380 (+1)	56 kDa	1
| organism=Plasmodium_berghei_ANKA | product=26S proteasome regulatory complex subunit, putative | location=berg09:744581-746452(-) | length=393 | sequence_SO=chromosome | SO=protein_coding	PBANKA_091900	47 kDa	1
| organism=Plasmodium_berghei_ANKA | product=replication factor C3, putative | location=berg13:1051019-1052497(+) | length=344 | sequence_SO=chromosome | SO=protein_coding	PBANKA_132680	39 kDa	1
| organism=Plasmodium_berghei_ANKA | product=casein kinase 1 (CK1) | location=berg09:484699-486614(+) | length=323 | sequence_SO=chromosome | SO=protein_coding	PBANKA_091210	38 kDa	1
| organism=Plasmodium_berghei_ANKA | product=replication factor C, subunit 2, putative | location=berg03:515667-516659(+) | length=330 | sequence_SO=chromosome | SO=protein_coding	PBANKA_031470	38 kDa	1
| organism=Plasmodium_berghei_ANKA | product=polyadenylate-binding protein, putative (PABP) | location=berg14:1437456-1439960(+) | length=834 | sequence_SO=chromosome | SO=protein_coding	PBANKA_143920	93 kDa	1
Cluster of | organism=Plasmodium_berghei_ANKA | product=histidine--tRNA ligase, putative | location=berg13:401165-404371(-) | length=1068 | sequence_SO=chromosome | SO=protein_coding (PBANKA_130890)	PBANKA_130890 [2]	125 kDa	1
| organism=Plasmodium_falciparum_3D7 | product=conserved Plasmodium protein, unknown function | location=Pf3D7_13_v3:184845-212660(-) | length=9271 | sequence_SO=chromosome | SO=protein_coding	PF3D7_1303800	1112 kDa	1
| organism=Plasmodium_berghei_ANKA | product=26s proteasome subunit p55, putative | location=berg05:86988-88579(+) | length=467 | sequence_SO=chromosome | SO=protein_coding	PBANKA_050220	55 kDa	1
| organism=Plasmodium_berghei_ANKA | product=glycine--tRNA ligase, putative (GlyRS) | location=berg10:876175-878613(-) | length=812 | sequence_SO=chromosome | SO=protein_coding	PBANKA_102280	95 kDa	1
| organism=Plasmodium_berghei_ANKA | product=karyopherin alpha, putative (KARalpha) | location=berg14:908813-910450(+) | length=545 | sequence_SO=chromosome | SO=protein_coding	PBANKA_142510	61 kDa	1
| organism=Plasmodium_berghei_ANKA | product=tyrosine--tRNA ligase, putative | location=berg12:840860-842230(-) | length=372 | sequence_SO=chromosome | SO=protein_coding	PBANKA_122280	43 kDa	1
| organism=Plasmodium_berghei_ANKA | product=ribonucleotide reductase small subunit, putative | location=berg10:1448949-1449998(+) | length=349 | sequence_SO=chromosome | SO=protein_coding	PBANKA_103660	40 kDa	1
| organism=Plasmodium_berghei_ANKA | product=isoleucine--tRNA ligase, putative | location=berg13:1839409-1843236(-) | length=1275 | sequence_SO=chromosome | SO=protein_coding	PBANKA_134770	151 kDa	1
| organism=Plasmodium_berghei_ANKA | product=RuvB-like helicase, putative (RUVB3) | location=berg11:1425338-1426765(-) | length=475 | sequence_SO=chromosome | SO=protein_coding	PBANKA_113820 (+1)	54 kDa	1
| organism=Plasmodium_berghei_ANKA | product=26S proteasome regulatory subunit S14, putative | location=berg04:388725-389636(+) | length=303 | sequence_SO=chromosome | SO=protein_coding	PBANKA_041030	36 kDa	1
| organism=Plasmodium_berghei_ANKA | product=malate dehydrogenase, putative (MDH) | location=berg11:643252-644193(+) | length=313 | sequence_SO=chromosome | SO=protein_coding	PBANKA_111770	34 kDa	1
| organism=Plasmodium_berghei_ANKA | product=early transcripted membrane protein (SEP3) | location=berg05:52093-52557(+) | length=154 | sequence_SO=chromosome | SO=protein_coding	PBANKA_050110	17 kDa	1
| organism=Plasmodium_berghei_ANKA | product=leucine--tRNA ligase, putative | location=berg11:778894-782643(+) | length=1249 | sequence_SO=chromosome | SO=protein_coding	PBANKA_112170	147 kDa	1
| organism=Plasmodium_berghei_ANKA | product=flap endonuclease 1, putative | location=berg10:264300-265739(-) | length=479 | sequence_SO=chromosome | SO=protein_coding	PBANKA_100610	55 kDa	1
| organism=Plasmodium_falciparum_3D7 | product=conserved Plasmodium protein, unknown function | location=Pf3D7_05_v3:367022-376426(+) | length=3134 | sequence_SO=chromosome | SO=protein_coding	PF3D7_0508900-DECOY	?	1
| organism=Plasmodium_falciparum_3D7 | product=tRNA 1-methyladenosine methyltransferase subunit, putative | location=Pf3D7_09_v3:563329-565179(-) | length=616 | sequence_SO=chromosome | SO=protein_coding	PF3D7_0912800-DECOY	?	1
| organism=Plasmodium_berghei_ANKA | product=acyl-CoA synthetase, putative | location=berg14:1997540-1999804(+) | length=754 | sequence_SO=chromosome | SO=protein_coding	PBANKA_145330	87 kDa	1
| organism=Plasmodium_berghei_ANKA | product=conserved Plasmodium protein, unknown function | location=berg10:901015-902427(-) | length=470 | sequence_SO=chromosome | SO=protein_coding	PBANKA_102350	55 kDa	1
| organism=Plasmodium_berghei_ANKA | product=armadillo repeat protein PF16 (PF16) | location=berg09:687619-689408(-) | length=509 | sequence_SO=chromosome | SO=protein_coding	PBANKA_091740	58 kDa	1
| organism=Plasmodium_berghei_ANKA | product=RNA-binding protein, putative | location=berg01:146949-149156(+) | length=735 | sequence_SO=chromosome | SO=protein_coding	PBANKA_010390	82 kDa	1
| organism=Plasmodium_berghei_ANKA | product=eukaryotic translation initiation factor 2, beta, putative | location=berg12:321693-322458(-) | length=224 | sequence_SO=chromosome | SO=protein_coding	PBANKA_120900	25 kDa	1
| organism=Plasmodium_berghei_ANKA | product=Sec24 subunit, putative | location=berg11:1386906-1390593(+) | length=942 | sequence_SO=chromosome | SO=protein_coding	PBANKA_113720	106 kDa	1
| organism=Plasmodium_berghei_ANKA | product=ABC transporter, putative | location=berg04:51991-55815(+) | length=1274 | sequence_SO=chromosome | SO=protein_coding	PBANKA_040120	149 kDa	1
| organism=Plasmodium_berghei_ANKA | product=DNA ligase I, putative | location=berg14:119032-121858(-) | length=898 | sequence_SO=chromosome | SO=protein_coding	PBANKA_140260	103 kDa	0
| organism=Plasmodium_berghei_ANKA | product=oocyst capsule protein (Cap380) | location=berg12:666016-675630(+) | length=3204 | sequence_SO=chromosome | SO=protein_coding	PBANKA_121810	375 kDa	0
Cluster of | organism=Plasmodium_berghei_ANKA | product=GMP synthetase, putative (GMPS) | location=berg12:378055-379689(-) | length=544 | sequence_SO=chromosome | SO=protein_coding (PBANKA_121100)	PBANKA_121100 [2]	63 kDa	0
| organism=Plasmodium_berghei_ANKA | product=nucleosome assembly protein (NAPS) | location=berg08:783965-785397(-) | length=267 | sequence_SO=chromosome | SO=protein_coding	PBANKA_081990	32 kDa	0
| organism=Plasmodium_berghei_ANKA | product=aspartate--tRNA ligase, putative | location=berg02:378689-380749(+) | length=686 | sequence_SO=chromosome | SO=protein_coding	PBANKA_021020	81 kDa	0
| organism=Plasmodium_berghei_ANKA | product=heat shock protein, putative | location=berg09:1412500-1414161(+) | length=553 | sequence_SO=chromosome | SO=protein_coding	PBANKA_093830	63 kDa	0
| organism=Plasmodium_berghei_ANKA | product=chromosome assembly factor 1, putative | location=berg11:69373-72126(+) | length=917 | sequence_SO=chromosome | SO=protein_coding	PBANKA_110160	107 kDa	0
| organism=Plasmodium_berghei_ANKA | product=adenosine deaminase, putative (ADA) | location=berg05:523492-524583(+) | length=363 | sequence_SO=chromosome | SO=protein_coding	PBANKA_051360-DECOY	?	0
| organism=Plasmodium_berghei_ANKA | product=chitinase (CHT1) | location=berg08:17568-19514(+) | length=648 | sequence_SO=chromosome | SO=protein_coding	PBANKA_080050	72 kDa
| organism=Plasmodium_berghei_ANKA | product=LCCL domain-containing protein (CCp5) | location=berg02:169994-173221(-) | length=1049 | sequence_SO=chromosome | SO=protein_coding	PBANKA_020450	122 kDa
| organism=Plasmodium_berghei_ANKA | product=plasmepsin X | location=berg12:828222-829886(+) | length=554 | sequence_SO=chromosome | SO=protein_coding	PBANKA_122250	63 kDa
| organism=Plasmodium_berghei_ANKA | product=conserved Plasmodium protein, unknown function | location=berg13:626663-629538(-) | length=879 | sequence_SO=chromosome | SO=protein_coding	PBANKA_131530	102 kDa
Cluster of | organism=Plasmodium_falciparum_3D7 | product=chromosome condensation protein, putative | location=Pf3D7_05_v3:381077-386203(+) | length=1708 | sequence_SO=chromosome | SO=protein_coding (PF3D7_0509100)	PF3D7_0509100 [2]	202 kDa
| organism=Plasmodium_berghei_ANKA | product=vacuolar ATP synthase subunit h, putative | location=berg14:208806-210621(-) | length=455 | sequence_SO=chromosome | SO=protein_coding	PBANKA_140510	54 kDa
| organism=Plasmodium_berghei_ANKA | product=chromosome segregation protein, putative | location=berg14:620901-624719(-) | length=1227 | sequence_SO=chromosome | SO=protein_coding	PBANKA_141690	144 kDa
| organism=Plasmodium_berghei_ANKA | product=FACT complex subunit SSRP1, putative (FACT-S) | location=berg13:255543-257024(+) | length=493 | sequence_SO=chromosome | SO=protein_coding	PBANKA_130530	57 kDa
| organism=Plasmodium_berghei_ANKA | product=rab specific GDP dissociation inhibitor, putative (rabGDI) | location=berg14:2116418-2118403(-) | length=454 | sequence_SO=chromosome | SO=protein_coding	PBANKA_145620	52 kDa
| organism=Plasmodium_falciparum_3D7 | product=zinc finger, C3HC4 type, putative | location=Pf3D7_07_v3:1218426-1225473(+) | length=2162 | sequence_SO=chromosome | SO=protein_coding	PF3D7_0728600-DECOY	?
| organism=Plasmodium_falciparum_3D7 | product=phosphoenolpyruvate carboxylase, putative (PEPC) | location=Pf3D7_14_v3:1036137-1039583(-) | length=1148 | sequence_SO=chromosome | SO=protein_coding	PF3D7_1426700	134 kDa
| organism=Plasmodium_berghei_ANKA | product=vacuolar ATP synthase subunit g, putative | location=berg13:1501465-1502130(-) | length=121 | sequence_SO=chromosome | SO=protein_coding	PBANKA_133840	14 kDa
| organism=Plasmodium_berghei_ANKA | product=ribonucleotide reductase small subunit, putative | location=berg12:514310-515798(+) | length=335 | sequence_SO=chromosome | SO=protein_coding	PBANKA_121420	40 kDa
| organism=Plasmodium_berghei_ANKA | product=perforin like protein 2 (PPLP2) | location=berg14:1164534-1167533(+) | length=999 | sequence_SO=chromosome | SO=protein_coding	PBANKA_143240	114 kDa
| organism=Plasmodium_berghei_ANKA | product=actin-depolymerizing factor 2 (ADF2) | location=berg11:1400911-1401449(-) | length=143 | sequence_SO=chromosome | SO=protein_coding	PBANKA_113750	17 kDa
| organism=Plasmodium_berghei_ANKA | product=phosphoglucomutase, putative | location=berg12:374296-376077(-) | length=593 | sequence_SO=chromosome | SO=protein_coding	PBANKA_121090	68 kDa
| organism=Plasmodium_berghei_ANKA | product=conserved Plasmodium protein, unknown function | location=berg14:659922-664718(+) | length=1052 | sequence_SO=chromosome | SO=protein_coding	PBANKA_141790	124 kDa
| organism=Plasmodium_berghei_ANKA | product=mitogen-activated protein kinase 2 (MAP2) | location=berg09:1260721-1262292(+) | length=523 | sequence_SO=chromosome | SO=protein_coding	PBANKA_093370	61 kDa
| organism=Plasmodium_berghei_ANKA | product=aspartyl protease, putative | location=berg14:1847885-1850196(-) | length=577 | sequence_SO=chromosome | SO=protein_coding	PBANKA_144900	65 kDa
| organism=Plasmodium_berghei_ANKA | product=DNA primase large subunit, putative | location=berg08:525581-527380(-) | length=537 | sequence_SO=chromosome | SO=protein_coding	PBANKA_081200	64 kDa
| organism=Plasmodium_berghei_ANKA | product=subtilisin-like protease 2 (SUB2) | location=berg09:463266-467094(-) | length=1230 | sequence_SO=chromosome | SO=protein_coding	PBANKA_091170	141 kDa
| organism=Plasmodium_berghei_ANKA | product=conserved Plasmodium protein, unknown function | location=berg08:880858-884123(+) | length=797 | sequence_SO=chromosome | SO=protein_coding	PBANKA_082290	94 kDa
